# Supplementary material for: Antagonistic and synergistic interactions dominate GHGs fluxes, soil properties and yield responses to biochar and N addition
Source: Frontiers journal article supplement (doi:10.3389/fenvs.2023.1123897), 2023-03-17
Supplement: Data_Sheet_2.xlsx [file Data_Sheet_2.xlsx]

## Sheet: Database
Response ratios (RR) and variance (vi) (reciprocal of weighting factor) extracted from each of the papers
Ref. no.	Citation	Latitude	Longtitude	MAP(mm)	MAT(℃)	Experiment type	Duration	Texture	Land-use	Soil pH	SOC (g kg-1)	STN (g kg-1)	Bulk (g/cm3)	N rate (kg ha-1)	N type	B rate (t ha-1)	Feedstock	pyrolysis temperature (°C)	Biochar pH	B-TC (g kg-1)	B-TN (g kg-1)	B-C/N	Replication	RR of pH	RR of SOC	RR of DOC	RR of MBC	RR of TN	RR of NH4+-N	RR of NH3--N	RR of MBN	RR of CO2	RR of CH4 emission	RR of CH4 uptake	RR of N2Oemission	RR of GWP	RR of yield	RR of GHGI	RR of Bulk	RR of CEC	RR of AOA	RR of AOB	RR of nirK	RR of nirS	RR of nosZ
1	Cheng et al., 2016b	41.8	123.38	710	7.28	Field	0.356164	medium	Upland	7.6	10.91		1.21	160	IN	0	herbaceous	500	9.2	679	10.7	63.4579	3	-0.00394997	-0.0951907			0.0229895									0.543496		0.0082988
1	Cheng et al., 2016b	41.8	123.38	710	7.28	Field	0.356164	medium	Upland	7.6	10.91		1.21	160	IN	20	herbaceous	500	9.2	679	10.7	63.4579	3	0.036133	0.118712			0.0601685									0.60242		-0.0870114
1	Cheng et al., 2016b	41.8	123.38	710	7.28	Field	0.356164	medium	Upland	7.6	10.91		1.21	160	IN	40	herbaceous	500	9.2	679	10.7	63.4579	3	0.0562089	0.210882			0.110001									0.394049		-0.172371
1	Cheng et al., 2016b	41.8	123.38	710	7.28	Field	0.356164	medium	Upland	7.6	10.91		1.21	160	IN	20	herbaceous	500	9.2	679	10.7	63.4579	3	0.0400829	0.213903			0.037179									0.0589244		-0.0953102
1	Cheng et al., 2016b	41.8	123.38	710	7.28	Field	0.356164	medium	Upland	7.6	10.91		1.21	160	IN	40	herbaceous	500	9.2	679	10.7	63.4579	3	0.0601589	0.306073			0.0870114									-0.149446		-0.18067
2	Liu et al., 2012	31.03	104.1	807	16.5	Field	0.410959		Paddy	5.99	20.11	1.81	1.1	0	None	20	herbaceous	500	10.4	467		79.1525	3	0.042705	0.159137			0.0272496							0		-0.0241558		-0.04567
2	Liu et al., 2012	31.03	104.1	807	16.5	Field	0.410959		Paddy	5.99	20.11	1.81	1.1	0	None	40	herbaceous	500	10.4	467		79.1525	3	0.127624	0.435405			0.0326116							0.435318		-0.0107979		-0.0935261
2	Liu et al., 2012	30.99	104.1	807	16.5	Field	0.410959		Paddy	5.99	20.11	1.81	1.1	240	IN	0	herbaceous	500	10.4	467		79.1525	3												2.83855		0.0758113
2	Liu et al., 2012	27.51	111.53	1500	17.1	Field	0.410959		Paddy	6.21	18.76	1.79	0.91	240	IN	0	herbaceous	500	10.4	467		79.1525	3												1.84811		0.207345
2	Liu et al., 2012	28.37	116.27	1400	17.7	Field	0.410959		Paddy	4.89	17.7	1.59	1.24	300	IN	0	herbaceous	500	10.4	467		79.1525	3												2.79321		0.171771
2	Liu et al., 2012	30.99	104.1	807	16.5	Field	0.410959		Paddy	5.99	20.11	1.81	1.1	240	IN	20	herbaceous	500	10.4	467		79.1525	3												2.49245		0.0713767
2	Liu et al., 2012	30.99	104.1	807	16.5	Field	0.410959		Paddy	5.99	20.11	1.81	1.1	240	IN	40	herbaceous	500	10.4	467		79.1525	3												2.06801		0.0824265
2	Liu et al., 2012	27.51	111.53	1500	17.1	Field	0.410959		Paddy	6.21	18.76	1.79	0.91	240	IN	20	herbaceous	500	10.4	467		79.1525	3												1.52794		0.193234
2	Liu et al., 2012	27.51	111.53	1500	17.1	Field	0.410959		Paddy	6.21	18.76	1.79	0.91	240	IN	40	herbaceous	500	10.4	467		79.1525	3												1.14117		0.247301
2	Liu et al., 2012	28.37	116.27	1400	17.7	Field	0.410959		Paddy	4.89	17.7	1.59	1.24	300	IN	20	herbaceous	500	10.4	467		79.1525	3												2.17222		0.222244
2	Liu et al., 2012	28.37	116.27	1400	17.7	Field	0.410959		Paddy	4.89	17.7	1.59	1.24	300	IN	40	herbaceous	500	10.4	467		79.1525	3												2.02228		0.248311
2	Liu et al., 2012	31.03	104.1	807	16.5	Field	0.410959		Paddy	5.99	20.11	1.81	1.1	240	IN	20	herbaceous	500	10.4	467		79.1525	3	0.0612615	0.111696			0.0381518							-0.346093		-0.0044346		-0.018519
2	Liu et al., 2012	31.03	104.1	807	16.5	Field	0.410959		Paddy	5.99	20.11	1.81	1.1	240	IN	40	herbaceous	500	10.4	467		79.1525	3	0.122186	0.405796			0.0953102							-0.770534		0.00661524		-0.0279088
2	Liu et al., 2012	31.03	104.1	1500	17.1	Field	0.410959		Paddy	6.21	18.76	1.79	0.91	0	None	20	herbaceous	500	10.4	467		79.1525	3	0.0397403	0.10455			0.0425596							0.231802		-0.00313972		-0.10414
2	Liu et al., 2012	31.03	104.1	1500	17.1	Field	0.410959		Paddy	6.21	18.76	1.79	0.91	0	None	40	herbaceous	500	10.4	467		79.1525	3	0.0494335	0.306149			0.0543941							-0.93827		-0.00313972		-0.154151
2	Liu et al., 2012	31.03	104.1	1500	17.1	Field	0.410959		Paddy	6.21	18.76	1.79	0.91	240	IN	20	herbaceous	500	10.4	467		79.1525	3	0.0230273	0.243652			0.0814403							-0.320168		-0.0141118		-0.071459
2	Liu et al., 2012	31.03	104.1	1500	17.1	Field	0.410959		Paddy	6.21	18.76	1.79	0.91	240	IN	40	herbaceous	500	10.4	467		79.1525	3	0.0455363	0.44298			0.0473461							-0.706941		0.0399554		-0.0964603
2	Liu et al., 2012	31.03	104.1	1400	17.7	Field	0.410959		Paddy	4.89	17.7	1.59	1.24	0	None	20	herbaceous	500	10.4	467		79.1525	3	0.0038835	0.100462			0.0281709							-0.251314		-0.00601506		-0.0689929
2	Liu et al., 2012	31.03	104.1	1400	17.7	Field	0.410959		Paddy	4.89	17.7	1.59	1.24	0	None	40	herbaceous	500	10.4	467		79.1525	3	0.0603957	0.530664			0.0874875							-0.251314		0.0193028		-0.143101
2	Liu et al., 2012	31.03	104.1	1400	17.7	Field	0.410959		Paddy	4.89	17.7	1.59	1.24	300	IN	20	herbaceous	500	10.4	467		79.1525	3	0.0222907	0.157439			0.0322609							-0.620985		0.0504723		-0.0877756
2	Liu et al., 2012	31.03	104.1	1400	17.7	Field	0.410959		Paddy	4.89	17.7	1.59	1.24	300	IN	40	herbaceous	500	10.4	467		79.1525	3	0.0480092	0.433782			0.0322609							-0.770925		0.0765401		-0.0695933
3	Zhang et al., 2021	29.02	133.31	1577.4	16.8	incubation			Upland	4.44	24.2	1.37	1.13	0	None	22.5	herbaceous	600	8.63	415.27	11.8	35.1924	3	0.0376614		-0.294283	0.117162		-0.326936	0.0848287		0.435527	1.17866
3	Zhang et al., 2021	29.02	133.31	1577.4	16.8	incubation			Upland	4.44	24.2	1.37	1.13	0	None	67.5	herbaceous	600	8.63	415.27	11.8	35.1924	3	0.107065		0.0366026	-0.0430647		-0.5186	0.13178		0.690766	2.26437
3	Zhang et al., 2021	29.02	133.31	1577.4	16.8	incubation			Upland	4.44	24.2	1.37	1.13	0	None	112.5	herbaceous	600	8.63	415.27	11.8	35.1924	3	0.203767		0.455369	0.21268		-0.610457	0.147278		0.915576	2.84781
3	Zhang et al., 2021	29.02	133.31	1577.4	16.8	incubation			Upland	4.44	24.2	1.37	1.13	337.5	IN	0	herbaceous	600	8.63	415.27	11.8	35.1924	3	0.0699874		1.02349	0.217536		0.756376	-0.000707364		0.356319	-0.287682
3	Zhang et al., 2021	29.02	133.31	1577.4	16.8	incubation			Upland	4.44	24.2	1.37	1.13	337.5	IN	22.5	herbaceous	600	8.63	415.27	11.8	35.1924	3	0.127919		1.16284	0.171873		0.690463	0.0351547		0.652498	0.223148
3	Zhang et al., 2021	29.02	133.31	1577.4	16.8	incubation			Upland	4.44	24.2	1.37	1.13	337.5	IN	67.5	herbaceous	600	8.63	415.27	11.8	35.1924	3	0.196786		1.47803	0.394074		0.554875	0.0567655		0.889539	1.98101
3	Zhang et al., 2021	29.02	133.31	1577.4	16.8	incubation			Upland	4.44	24.2	1.37	1.13	337.5	IN	112.5	herbaceous	600	8.63	415.27	11.8	35.1924	3	0.247992		1.64836	0.572861		0.508883	0.226447		1.02885	2.21102
4	Sun et al., 2016b	52.63	12.8	503	8.7	Field	1	coarse	Upland	6	7.3	0.7		0	None	10	wood	850	9.35	780	7.2	108.333	3				-0.0278348		0.634498	-0.219544		0.175746			0.445941										-0.0654278
4	Sun et al., 2016b	52.63	12.8	503	8.7	Field	1	coarse	Upland	6	7.3	0.7		195	IN	10	wood	850	9.35	780	7.2	108.333	3				-0.246263		0.36546	-0.0543612		-0.0290912			-0.431527										0.0666091
4	Sun et al., 2016b	52.63	12.8	503	8.7	Field	1	coarse	Upland	6	7.3	0.7		195	IN	0	wood	850	9.35	780	7.2	108.333	3				0.0497234		-0.843087	0.597356		0.178334			1.18682										0.267479
4	Sun et al., 2016b	52.63	12.8	503	8.7	Field	1	coarse	Upland	6	7.3	0.7		195	IN	10	wood	850	9.35	780	7.2	108.333	3				-0.19654		-0.477628	0.542995		0.149243			0.755296										0.334088
4	Sun et al., 2016b	52.63	12.8	503	8.7	Field	1	coarse	Upland	6	7.3	0.7		195	IN	10	wood	850	9.35	780	7.2	108.333	3				-0.168705		-1.11213	0.762539		-0.0265027			0.309355										0.399516
5	Wang et al., 2019	35.28	104.44	390.9	6.4	Field	1		upland				1.17	50	IN	0	herbaceous			532.8	10.4	51.2308	3											0.0900704
5	Wang et al., 2019	35.28	104.44	390.9	6.4	Field	1		upland				1.17	100	IN	0	herbaceous			532.8	10.4	51.2308	3											0.126633
5	Wang et al., 2019	35.28	104.44	390.9	6.4	Field	1		upland				1.17	0	None	15	herbaceous			532.8	10.4	51.2308	3											-0.00176422
5	Wang et al., 2019	35.28	104.44	390.9	6.4	Field	1		upland				1.17	50	IN	15	herbaceous			532.8	10.4	51.2308	3											0.0545776
5	Wang et al., 2019	35.28	104.44	390.9	6.4	Field	1		upland				1.17	100	IN	15	herbaceous			532.8	10.4	51.2308	3											0.070777
6	Sherman et al., 2020	46.98	-116.48	1202.34	4.94	Field	1.5	medium	upland					0	None	2.5	wood	980					3									-0.0742907
6	Sherman et al., 2020	46.98	-116.48	1202.34	4.94	Field	1.5	medium	upland					224	IN	0	wood	980					3									-0.0563075
6	Sherman et al., 2020	46.98	-116.48	1202.34	4.94	Field	1.5	medium	upland					224	IN	2.5	wood	980					3									-0.0879936
6	Sherman et al., 2020	46.84	-116.85	1202.34	4.94	Field	2.9	medium	upland					0	None	2.5	wood	980					3									0.107535
6	Sherman et al., 2020	46.84	-116.85	1202.34	4.94	Field	2.9	medium	upland					224	IN	0	wood	980					3									0.110287
6	Sherman et al., 2020	46.84	-116.85	1202.34	4.94	Field	2.9	medium	upland					224	IN	2.5	wood	980					3									0.113032
7	Zhang et al., 2016	33.19	120.45	1045	16.06	Field	0.29589	coarse	upland	8.2	11.8	0.64	1.28	0	None	10	wood	400	9.6	596	6.8	87.6471	4									0.0735341			-1.50408		0.0815986
7	Zhang et al., 2016	33.19	120.45	1045	16.06	Field	0.29589	coarse	upland	8.2	11.8	0.64	1.28	225	IN	10	wood	400	9.6	596	6.8	87.6471	4									0.336079	-1.60944		-0.0276834	-0.039636	0.00788026	-0.0475162
7	Zhang et al., 2016	33.19	120.45	1045	16.06	Field	0.666667	coarse	upland	8.2	11.8	0.64	1.28	0	None	10	wood	400	9.6	596	6.8	87.6471	4									-0.241745		0.949081	-1.59505	0.542812
7	Zhang et al., 2016	33.19	120.45	1045	16.06	Field	0.666667	coarse	upland	8.2	11.8	0.64	1.28	225	IN	10	wood	400	9.6	596	6.8	87.6471	4									-0.414161	-1.2164		-0.12371	-0.132914
7	Zhang et al., 2016	33.19	120.45	1045	16.06	Field	0.29589	coarse	upland	8.2	11.8	0.64	1.28	225	IN	10	wood	400	9.6	596	6.8	87.6471	4									0.713029			1.84583
7	Zhang et al., 2016	33.19	120.45	1045	16.06	Field	0.666667	coarse	upland	8.2	11.8	0.64	1.28	225	IN	10	wood	400	9.6	596	6.8	87.6471	4									0.383866			1.25895
7	Zhang et al., 2016	33.19	120.45	1045	16.06	Field	0.29589	coarse	upland	8.2	11.8	0.64	1.28	225	IN	0	wood	400	9.6	596	6.8	87.6471	4									0.37695			1.87351		0.939501
7	Zhang et al., 2016	33.19	120.45	1045	16.06	Field	0.666667	coarse	upland	8.2	11.8	0.64	1.28	225	IN	0	wood	400	9.6	596	6.8	87.6471	4									0.798027			1.38266
7	Zhang et al., 2016	33.19	120.45	1045	16.06	Field	0.29589	coarse	upland	8.2	11.8	0.64	1.28	225	IN	10	wood	400	9.6	596	6.8	87.6471	4									0.639494			3.3499
7	Zhang et al., 2016	33.19	120.45	1045	16.06	Field	0.666667	coarse	upland	8.2	11.8	0.64	1.28	225	IN	10	wood	400	9.6	596	6.8	87.6471	4									0.625611			2.854
8	Clough et al., 2009	-43.38	172.26			incubation		fine	upland	4.9	40	4		0	None	20	wood	600	8.7	706	2	353	4												0.247836
8	Clough et al., 2009	-43.38	172.26			incubation		fine	upland	4.9	40	4		760	OF	20	wood	600	8.7	706	2	353	4												-0.781701
8	Clough et al., 2009	-43.38	172.26			incubation		fine	upland	4.9	40	4		760	OF	20	wood	600	8.7	706	2	353	4												1.03407
8	Clough et al., 2009	-43.38	172.26			incubation		fine	upland	4.9	40	4		760	OF	0	wood	600	8.7	706	2	353	4												1.81577
8	Clough et al., 2009	-43.38	172.26			incubation		fine	upland	4.9	40	4		760	OF	20	wood	600	8.7	706	2	353	4												0.786238
9	He et al., 2016	28.4	115.37			incubation		medium	upland	5.05	9.11	1.01		0	None	22.5	herbaceous	500	9.16	620	13.3	46.6165	3	0.0419037					0.00775829						-0.0870919
9	He et al., 2016	28.4	115.37			incubation		medium	upland	5.05	9.11	1.01		0	None	112.5	herbaceous	500	9.16	620	13.3	46.6165	3	0.287715					-0.00727652						-0.132568
9	He et al., 2016	28.4	115.37			incubation		medium	upland	5.05	9.11	1.01		250	IN	22.5	herbaceous	500	9.16	620	13.3	46.6165	3	0.0417569					-0.344418						-0.406565
9	He et al., 2016	28.4	115.37			incubation		medium	upland	5.05	9.11	1.01		250	IN	112.5	herbaceous	500	9.16	620	13.3	46.6165	3	0.340974					-0.0658134						-0.472377
9	He et al., 2016	28.4	115.37			incubation		medium	upland	5.05	9.11	1.01		250	IN	0	herbaceous	500	9.16	620	13.3	46.6165	3	-0.0987621					0.379208						1.062
9	He et al., 2016	28.4	115.37			incubation		medium	upland	5.05	9.11	1.01		250	IN	22.5	herbaceous	500	9.16	620	13.3	46.6165	3	-0.0570052					0.0347903						0.65544
9	He et al., 2016	28.4	115.37			incubation		medium	upland	5.05	9.11	1.01		250	IN	112.5	herbaceous	500	9.16	620	13.3	46.6165	3	0.242212					0.313395						0.589628
9	He et al., 2016	28.4	115.37			incubation		medium	upland	5.05	9.11	1.01		250	IN	22.5	herbaceous	500	9.16	620	13.3	46.6165	3	-0.0989089					0.027032						0.742532
9	He et al., 2016	28.4	115.37			incubation		medium	upland	5.05	9.11	1.01		250	IN	112.5	herbaceous	500	9.16	620	13.3	46.6165	3	-0.0455032					0.320671						0.722196
9	He et al., 2016	28.15	116.55			incubation		coarse	upland	4.9	4.72	0.43		0	None	22.5	herbaceous	500	9.16	620	13.3	46.6165	3	0.0782634					0.00482665						-0.508093
9	He et al., 2016	28.15	116.55			incubation		coarse	upland	4.9	4.72	0.43		0	None	112.5	herbaceous	500	9.16	620	13.3	46.6165	3	0.498314					0.0513934						-0.418321
9	He et al., 2016	28.15	116.55			incubation		coarse	upland	4.9	4.72	0.43		250	IN	22.5	herbaceous	500	9.16	620	13.3	46.6165	3	0.037889					-0.0422794						-0.164513
9	He et al., 2016	28.15	116.55			incubation		coarse	upland	4.9	4.72	0.43		250	IN	112.5	herbaceous	500	9.16	620	13.3	46.6165	3	0.40808					-1.55887						-0.625049
9	He et al., 2016	28.15	116.55			incubation		coarse	upland	4.9	4.72	0.43		250	IN	0	herbaceous	500	9.16	620	13.3	46.6165	3	0.000142814					1.54277						0.760046
9	He et al., 2016	28.15	116.55			incubation		coarse	upland	4.9	4.72	0.43		250	IN	22.5	herbaceous	500	9.16	620	13.3	46.6165	3	0.0380318					1.50049						0.595532
9	He et al., 2016	28.15	116.55			incubation		coarse	upland	4.9	4.72	0.43		250	IN	112.5	herbaceous	500	9.16	620	13.3	46.6165	3	0.408223					-0.0160975						0.134997
9	He et al., 2016	28.15	116.55			incubation		coarse	upland	4.9	4.72	0.43		250	IN	22.5	herbaceous	500	9.16	620	13.3	46.6165	3	-0.0402316					1.49566						1.10363
9	He et al., 2016	28.15	116.55			incubation		coarse	upland	4.9	4.72	0.43		250	IN	112.5	herbaceous	500	9.16	620	13.3	46.6165	3	-0.0900912					-0.0674909						0.553318
10	Bruun et al., 2011	55.41	12.05			incubation		coarse	upland	7		1.4		0	None	14	herbaceous	525	7.4	504	12	42	4									0.276574			-1.54045
10	Bruun et al., 2011	55.41	12.05			incubation		coarse	upland	7		1.4		0	None	42	herbaceous	525	7.4	504	12	42	4									0.715473			-0.693147
10	Bruun et al., 2011	55.41	12.05			incubation		coarse	upland	7		1.4		150	OF	14	herbaceous	525	7.4	504	12	42	4									0.393507			0.223144
10	Bruun et al., 2011	55.41	12.05			incubation		coarse	upland	7		1.4		150	OF	42	herbaceous	525	7.4	504	12	42	4									0.898402			-0.287682
10	Bruun et al., 2011	55.41	12.05			incubation		coarse	upland	7		1.4		150	OF	0	herbaceous	525	7.4	504	12	42	4									0.00642452			-0.559616
10	Bruun et al., 2011	55.41	12.05			incubation		coarse	upland	7		1.4		150	OF	14	herbaceous	525	7.4	504	12	42	4									0.399931			-0.336472
10	Bruun et al., 2011	55.41	12.05			incubation		coarse	upland	7		1.4		150	OF	42	herbaceous	525	7.4	504	12	42	4									0.904826			-0.847298
10	Bruun et al., 2011	55.41	12.05			incubation		coarse	upland	7		1.4		150	OF	14	herbaceous	525	7.4	504	12	42	4									0.123357			1.20397
10	Bruun et al., 2011	55.41	12.05			incubation		coarse	upland	7		1.4		150	OF	42	herbaceous	525	7.4	504	12	42	4									0.189354			-0.154151
10	Bruun et al., 2011	55.41	12.05			incubation		coarse	upland	7		1.4		0	None	14	herbaceous	525	7.4	504	12	42	4	0.0448521		0.356449	0.0804298			-0.565651		0.271038			1.44345
10	Bruun et al., 2011	55.41	12.05			incubation		coarse	upland	7		1.4		0	None	42	herbaceous	525	7.4	504	12	42	4	0.0492525		0.853312	-0.173291			-0.827739		0.850448			1.37148
10	Bruun et al., 2011	55.41	12.05			incubation		coarse	upland	7		1.4		150	OF	14	herbaceous	525	7.4	504	12	42	4	-0.00612663		0.0651442	0.228177			-0.27093		0.452803			0.21552
10	Bruun et al., 2011	55.41	12.05			incubation		coarse	upland	7		1.4		150	OF	42	herbaceous	525	7.4	504	12	42	4	-0.00884301		0.368079	0.301255			-0.877059		0.907407			-0.418204
10	Bruun et al., 2011	55.41	12.05			incubation		coarse	upland	7		1.4		150	OF	0	herbaceous	525	7.4	504	12	42	4	0.0272099		0.231301	-0.00241902			0.223881		-0.122059			1.53623
10	Bruun et al., 2011	55.41	12.05			incubation		coarse	upland	7		1.4		150	OF	14	herbaceous	525	7.4	504	12	42	4	0.0210833		0.296445	0.225758			-0.0470492		0.330743			1.75175
10	Bruun et al., 2011	55.41	12.05			incubation		coarse	upland	7		1.4		150	OF	42	herbaceous	525	7.4	504	12	42	4	0.0183669		0.59938	0.298836			-0.653179		0.785348			1.11803
10	Bruun et al., 2011	55.41	12.05			incubation		coarse	upland	7		1.4		150	OF	14	herbaceous	525	7.4	504	12	42	4	-0.0237688		-0.0600034	0.145329			0.518602		0.0597052			0.308301
10	Bruun et al., 2011	55.41	12.05			incubation		coarse	upland	7		1.4		150	OF	42	herbaceous	525	7.4	504	12	42	4	-0.0308856		-0.253932	0.472126			0.17456		-0.0651001			-0.253449
11	Lin et al., 2017	31.24	120.25			incubation			upland	5.95	23.59	1.68	1	0	None	20	herbaceous	400	10.74	492.67	11.64	42.3256	4	0.0428369					-0.293348	1.0143					0.10798						0.155057	0.517044	0.117128	0.0921715	-0.314403
11	Lin et al., 2017	31.24	120.25			incubation			upland	5.95	23.59	1.68	1	0	None	80	herbaceous	400	10.74	492.67	11.64	42.3256	4	0.332259					-1.04672	0.555367					1.3493						0.302727	0.0404841	0.182309	0.186465	-0.275557
11	Lin et al., 2017	31.24	120.25			incubation			upland	5.95	23.59	1.68	1	400	IN	20	herbaceous	400	10.74	492.67	11.64	42.3256	4	-0.00302175					-0.219629	0.636041					0.400399						-0.0797585	0.224029	0.0467238	0.0928322	0.229208
11	Lin et al., 2017	31.24	120.25			incubation			upland	5.95	23.59	1.68	1	400	IN	80	herbaceous	400	10.74	492.67	11.64	42.3256	4	0.197657					-1.49706	0.59413					1.26645						-0.283199	-0.512174	0.239086	0.0865924	0.318942
11	Lin et al., 2017	31.24	120.25			incubation			upland	5.95	23.59	1.68	1	400	IN	0	herbaceous	400	10.74	492.67	11.64	42.3256	4	-0.0942268					1.12961	1.72612					1.64061						0.328364	0.321958	0.139899	-0.100482	-0.415552
11	Lin et al., 2017	31.24	120.25			incubation			upland	5.95	23.59	1.68	1	400	IN	20	herbaceous	400	10.74	492.67	11.64	42.3256	4	-0.0972485					0.909976	2.36216					2.04101						0.248605	0.545987	0.186622	-0.00764951	-0.186344
11	Lin et al., 2017	31.24	120.25			incubation			upland	5.95	23.59	1.68	1	400	IN	80	herbaceous	400	10.74	492.67	11.64	42.3256	4	0.10343					-0.367456	2.32025					2.90706						0.0451651	-0.190216	0.378985	-0.0138893	-0.0966099
11	Lin et al., 2017	31.24	120.25			incubation			upland	5.95	23.59	1.68	1	400	IN	20	herbaceous	400	10.74	492.67	11.64	42.3256	4	-0.140085					1.20332	1.34786					1.93303						0.0935486	0.0289424	0.0694943	-0.099821	0.128059
11	Lin et al., 2017	31.24	120.25			incubation			upland	5.95	23.59	1.68	1	400	IN	80	herbaceous	400	10.74	492.67	11.64	42.3256	4	-0.22883					0.679261	1.76488					1.55776						-0.257562	-0.2307	0.196676	-0.200354	0.178947
12	Lan et al., 2018	-27.43	153.1	776	20	pot		coarse	upland	3.8	8.4	0.6	1.4	0	none	35.375	wood	600	6.88	637	0.9	724	3	0.126316	1.27887	-0.0676859	0.188921	0.0333364		-1.24599	0.209084				-0.610304
12	Lan et al., 2018	-27.43	153.1	776	20	pot		coarse	upland	3.8	8.4	0.6	1.4	0	none	35.375	wood	700	8.15	624	0.7	870	3	0.150885	1.26503	-0.159321	0.441933	0.0168071		-0.703393	0.288519				-0.451116
12	Lan et al., 2018	-27.43	153.1	776	20	pot		coarse	upland	3.8	8.4	0.6	1.4	0	none	35.375	wood	850	8.45	723	1.4	514	3	0.16529	1.31266	-0.121659	0.255405	0.0333364		-1.23037	0.405904				-0.494707
12	Lan et al., 2018	-27.43	153.1	776	20	pot		coarse	upland	3.8	8.4	0.6	1.4	0	none	35.375	wood	950	8.48	701	1.2	565	3	0.170225	1.29928	-0.178692	0.216732	0.0333364		-0.925393	0.246875				-0.400767
12	Lan et al., 2018	-27.43	153.1	776	20	pot		coarse	upland	3.8	8.4	0.6	1.4	150	IN	35.375	wood	600	6.88	637	0.9	724	3	0.0136159	1.30264	-0.0831077	0.572219	0.0571584		-0.184456	0.271571				-1.36748
12	Lan et al., 2018	-27.43	153.1	776	20	pot		coarse	upland	3.8	8.4	0.6	1.4	150	IN	35.375	wood	700	8.15	624	0.7	870	3	0.0463688	1.29928	-0.149252	0.558327	0.0571584		-0.0643976	-0.134004				-1.73006
12	Lan et al., 2018	-27.43	153.1	776	20	pot		coarse	upland	3.8	8.4	0.6	1.4	150	IN	35.375	wood	850	8.45	723	1.4	514	3	0.108505	1.32258	-0.150605	0.50696	0.0571584		-0.283428	-0.132845				-1.91086
12	Lan et al., 2018	-27.43	153.1	776	20	pot		coarse	upland	3.8	8.4	0.6	1.4	150	IN	35.375	wood	950	8.48	701	1.2	565	3	0.0900384	1.31266	-0.173438	0.707841	0.0571584		-0.0226436	0.397468				-1.83062
12	Lan et al., 2018	-27.43	153.1	776	20	pot		coarse	upland	3.8	8.4	0.6	1.4	150	IN	0							3	-0.0803771	0	0.0583239	-0.595198	0.14197		1.58159	-0.0633178				3.03222
12	Lan et al., 2018	-27.43	153.1	776	20	pot		coarse	upland	3.8	8.4	0.6	1.4	150	IN	35.375	wood	600	6.88	637	0.9	724	3	-0.0667612	1.30264	-0.0247838	-0.0229789	0.199129		1.39713	0.208253				1.66474
12	Lan et al., 2018	-27.43	153.1	776	20	pot		coarse	upland	3.8	8.4	0.6	1.4	150	IN	35.375	wood	700	8.15	624	0.7	870	3	-0.0340083	1.29928	-0.090928	-0.0368713	0.199129		1.51719	-0.197322				1.30217
12	Lan et al., 2018	-27.43	153.1	776	20	pot		coarse	upland	3.8	8.4	0.6	1.4	150	IN	35.375	wood	850	8.45	723	1.4	514	3	0.0281274	1.32258	-0.0922814	-0.0882385	0.199129		1.29816	-0.196163				1.12136
12	Lan et al., 2018	-27.43	153.1	776	20	pot		coarse	upland	3.8	8.4	0.6	1.4	150	IN	35.375	wood	950	8.48	701	1.2	565	3	0.00966125	1.31266	-0.115114	0.112643	0.199129		1.55894	0.33415				1.20161
12	Lan et al., 2018	-27.43	153.1	776	20	pot		coarse	upland	3.8	8.4	0.6	1.4	150	IN	35.375	wood	600	6.88	637	0.9	724	3	-0.193078	0.0237702	0.0429021	-0.2119	0.165792		2.64312	-0.000830875				2.27505
12	Lan et al., 2018	-27.43	153.1	776	20	pot		coarse	upland	3.8	8.4	0.6	1.4	150	IN	35.375	wood	700	8.15	624	0.7	870	3	-0.184893	0.0342499	0.068393	-0.478804	0.182322		2.22058	-0.48584				1.75328
12	Lan et al., 2018	-27.43	153.1	776	20	pot		coarse	upland	3.8	8.4	0.6	1.4	150	IN	35.375	wood	850	8.45	723	1.4	514	3	-0.137162	0.00991744	0.029378	-0.343643	0.165792		2.52853	-0.602067				1.61607
12	Lan et al., 2018	-27.43	153.1	776	20	pot		coarse	upland	3.8	8.4	0.6	1.4	150	IN	35.375	wood	950	8.48	701	1.2	565	3	-0.160563	0.0133781	0.063578	-0.104089	0.165792		2.48434	0.0872754				1.60237
13	Sistani et al., 2019	36.56	-86.28	1300	14.5	Field	1	medium	upland	4.7	13.05	1.4		0	None	21.28	wood	550	5.59	682.9	2.5	273.16	3									-0.025064			0.0596271		-0.142567
13	Sistani et al., 2019	36.56	-86.28	1300	14.5	Field	1	medium	upland	4.7	13.05	1.4		224	IN	0	wood	550	5.59	682.9	2.5	273.16	3									-0.030153			0.591781		-0.18566
13	Sistani et al., 2019	36.56	-86.28	1300	14.5	Field	1	medium	upland	4.7	13.05	1.4		224	IN	21.28	wood	550	5.59	682.9	2.5	273.16	3									-0.137784			0.266268		-0.319882
13	Sistani et al., 2019	36.56	-86.28	1300	14.5	Field	2	medium	upland	4.7	13.05	1.4		0	None	21.28	wood	550	5.59	682.9	2.5	273.16	3									-0.0702692			0.221307		-0.0827659
13	Sistani et al., 2019	36.56	-86.28	1300	14.5	Field	2	medium	upland	4.7	13.05	1.4		224	IN	0	wood	550	5.59	682.9	2.5	273.16	3									-0.259511			1.27991		-0.176478
13	Sistani et al., 2019	36.56	-86.28	1300	14.5	Field	2	medium	upland	4.7	13.05	1.4		224	IN	21.28	wood	550	5.59	682.9	2.5	273.16	3									-0.393043			1.14638		-0.282281
14	Zheng et al., 2012	37	-102			incubation		coarse	upland	8.95	6.1	0.7		0	None	292	wood	550	10.2	520	3.2	162.5	3							-0.965444		0.136071		-0.0625169	0.127096	0.137041
14	Zheng et al., 2012	37	-102			incubation		coarse	upland	8.95	6.1	0.7		0	None	292	wood	550	10.5	560.7	2.7	207.667	3							-0.34964		-0.0611448		-0.319328	-0.0307316	-0.0572603
14	Zheng et al., 2012	37	-102			incubation		coarse	upland	8.95	6.1	0.7		100	IN	292	wood	550	10.2	520	3.2	162.5	3						-0.226502	-0.0773075		0.103607		-0.00542075	-0.22052	0.0686449
14	Zheng et al., 2012	37	-102			incubation		coarse	upland	8.95	6.1	0.7		100	IN	292	wood	550	10.5	560.7	2.7	207.667	3						0.0468718	-0.0307778		-0.209582		-0.371307	0.0174949	-0.177414
14	Zheng et al., 2012	37	-102			incubation		coarse	upland	8.95	6.1	0.7		100	IN	0							3							2.40494		0.38095		-0.228895	1.14154	0.454138
14	Zheng et al., 2012	37	-102			incubation		coarse	upland	8.95	6.1	0.7		100	IN	292	wood	550	10.2	520	3.2	162.5	3							2.32763		0.484558		-0.234315	0.921015	0.522783
14	Zheng et al., 2012	37	-102			incubation		coarse	upland	8.95	6.1	0.7		100	IN	292	wood	550	10.5	560.7	2.7	207.667	3							2.37416		0.171368		-0.600202	1.15903	0.276724
14	Zheng et al., 2012	37	-102			incubation		coarse	upland	8.95	6.1	0.7		100	IN	292	wood	550	10.2	520	3.2	162.5	3							3.29308		0.348486		-0.171798	0.79392	0.385742
14	Zheng et al., 2012	37	-102			incubation		coarse	upland	8.95	6.1	0.7		100	IN	292	wood	550	10.5	560.7	2.7	207.667	3							2.7238		0.232513		-0.280874	1.18976	0.333985
14	Zheng et al., 2012	37	-102			incubation		medium	upland	6.27	19.7	1.9		0	None	292	wood	550	10.2	520	3.2	162.5	3							-0.766627		0.0919539	1.06363		-2.63549	-0.101077
14	Zheng et al., 2012	37	-102			incubation		medium	upland	6.27	19.7	1.9		0	None	292	wood	550	10.5	560.7	2.7	207.667	3							-0.44153		0.103788	0.135385		0.420802	0.171526
14	Zheng et al., 2012	37	-102			incubation		medium	upland	6.27	19.7	1.9		100	IN	292	wood	550	10.2	520	3.2	162.5	3						-0.0216195	-0.137029		0.224348	1.35281		-1.01118	-0.636705
14	Zheng et al., 2012	37	-102			incubation		medium	upland	6.27	19.7	1.9		100	IN	292	wood	550	10.5	560.7	2.7	207.667	3						0.0721989	-0.180098		0.240596	1.14916		-0.828275	-0.523808
14	Zheng et al., 2012	37	-102			incubation		medium	upland	6.27	19.7	1.9		100	IN	0							3							3.08676		-0.106824	0.758703		2.83266	1.36664
14	Zheng et al., 2012	37	-102			incubation		medium	upland	6.27	19.7	1.9		100	IN	292	wood	550	10.2	520	3.2	162.5	3							2.94973		0.117525	2.11151		1.82148	0.729933
14	Zheng et al., 2012	37	-102			incubation		medium	upland	6.27	19.7	1.9		100	IN	292	wood	550	10.5	560.7	2.7	207.667	3							2.90666		0.133773	1.90787		2.00439	0.842829
14	Zheng et al., 2012	37	-102			incubation		medium	upland	6.27	19.7	1.9		100	IN	292	wood	550	10.2	520	3.2	162.5	3							3.71636		0.0255709	1.04787		4.45697	0.83101
14	Zheng et al., 2012	37	-102			incubation		medium	upland	6.27	19.7	1.9		100	IN	292	wood	550	10.5	560.7	2.7	207.667	3							3.34819		0.0299853	1.77248		1.58359	0.671303
15	Wang et al., 2012	31.14	118.22			pot		fine	upland	7.8	4.8	0.42	1.16	0	None	25	lignocellulosic	450	9.1	465.4	6.2	75.0645	3									-0.18337	0.261904		-1.60944	-0.0902392	0.0689953	-0.159235
15	Wang et al., 2012	31.14	118.22			pot		fine	upland	7.8	4.8	0.42	1.16	0	None	50	lignocellulosic	450	9.1	465.4	6.2	75.0645	3									-0.238058	0.311352		-0.916291	-0.115244	0.208757	-0.324001
15	Wang et al., 2012	31.14	118.22			pot		fine	upland	7.8	4.8	0.42	1.16	375	IN	25	lignocellulosic	450	9.1	465.4	6.2	75.0645	3									-0.154384	0.305382		-0.182322	-0.100698	0.032521	-0.133219
15	Wang et al., 2012	31.14	118.22			pot		fine	upland	7.8	4.8	0.42	1.16	375	IN	50	lignocellulosic	450	9.1	465.4	6.2	75.0645	3									-0.144479	0.381368		-0.875469	-0.0843124	0.194642	-0.278954
15	Wang et al., 2012	31.14	118.22			pot		fine	upland	7.8	4.8	0.42	1.16	375	IN	0	lignocellulosic	450	9.1	465.4	6.2	75.0645	3									0.919516	0.160121		0.875469	0.238081	0.770441	-0.53236
15	Wang et al., 2012	31.14	118.22			pot		fine	upland	7.8	4.8	0.42	1.16	375	IN	25	lignocellulosic	450	9.1	465.4	6.2	75.0645	3									0.765132	0.465502		0.693147	0.485145	0.802962	-0.317817
15	Wang et al., 2012	31.14	118.22			pot		fine	upland	7.8	4.8	0.42	1.16	375	IN	25	lignocellulosic	450	9.1	465.4	6.2	75.0645	3									0.775038	0.541488		0	0.508506	0.965083	-0.456576
15	Wang et al., 2012	31.14	118.22			pot		fine	upland	7.8	4.8	0.42	1.16	375	IN	25	lignocellulosic	450	9.1	465.4	6.2	75.0645	3									0.948503	0.203599		2.30259	0.291148	0.733966	-0.442819
15	Wang et al., 2012	31.14	118.22			pot		fine	upland	7.8	4.8	0.42	1.16	375	IN	25	lignocellulosic	450	9.1	465.4	6.2	75.0645	3									1.0131	0.230137		0.916291	0.253578	0.756326	-0.502748
15	Wang et al., 2012	31.14	118.22			pot		fine	upland	7.8	4.8	0.42	1.16	0	None	25	lignocellulosic	450	9.1	465.4	6.2	75.0645	3	0.0164249					-0.236389	-0.0888312		-0.0937775			-0.81093		0.0472521
15	Wang et al., 2012	31.14	118.22			pot		fine	upland	7.8	4.8	0.42	1.16	0	None	50	lignocellulosic	450	9.1	465.4	6.2	75.0645	3	0.0101395					-0.305382	0.1441		0.117987			-1.09861		0.15645
15	Wang et al., 2012	31.14	118.22			pot		fine	upland	7.8	4.8	0.42	1.16	375	IN	25	lignocellulosic	450	9.1	465.4	6.2	75.0645	3	0.00772205					-0.405465	0.354545		-0.0668524			-0.523248		0.0789351
15	Wang et al., 2012	31.14	118.22			pot		fine	upland	7.8	4.8	0.42	1.16	375	IN	50	lignocellulosic	450	9.1	465.4	6.2	75.0645	3	0.00900328					-0.372675	0.473985		0.1316			-0.993252		0.12107
15	Wang et al., 2012	31.14	118.22			pot		fine	upland	7.8	4.8	0.42	1.16	375	IN	0	lignocellulosic	450	9.1	465.4	6.2	75.0645	3	-0.0141118					0.169076	-0.0618754		1.06209			1.09861		1.56069
15	Wang et al., 2012	31.14	118.22			pot		fine	upland	7.8	4.8	0.42	1.16	375	IN	25	lignocellulosic	450	9.1	465.4	6.2	75.0645	3	-0.0063898					-0.236389	0.29267		0.995234			0.575364		1.63962
15	Wang et al., 2012	31.14	118.22			pot		fine	upland	7.8	4.8	0.42	1.16	375	IN	25	lignocellulosic	450	9.1	465.4	6.2	75.0645	3	-0.00510857					-0.203599	0.41211		1.19369			0.105361		1.68176
15	Wang et al., 2012	31.14	118.22			pot		fine	upland	7.8	4.8	0.42	1.16	375	IN	25	lignocellulosic	450	9.1	465.4	6.2	75.0645	3	-0.0228147					0	0.381501		1.08901			1.38629		1.59237
15	Wang et al., 2012	31.14	118.22			pot		fine	upland	7.8	4.8	0.42	1.16	375	IN	25	lignocellulosic	450	9.1	465.4	6.2	75.0645	3	-0.0152481					0.101783	0.268009		1.0757			1.20397		1.52531
15	Wang et al., 2012	31.14	118.22			incubation		fine	upland	6.6	14.7	1.32	1.28	0	None	50	lignocellulosic	450	9.1	465.4	6.2	75.0645	4									0.253192			-4.16053
15	Wang et al., 2012	31.14	118.22			incubation		fine	upland	6.6	14.7	1.32	1.28	375	IN	50	lignocellulosic	450	9.1	465.4	6.2	75.0645	4									0.00516115			-0.0597997
15	Wang et al., 2012	31.14	118.22			incubation		fine	upland	6.6	14.7	1.32	1.28	375	IN	0	lignocellulosic	450	9.1	465.4	6.2	75.0645	4									0.132647			1.19258
15	Wang et al., 2012	31.14	118.22			incubation		fine	upland	6.6	14.7	1.32	1.28	375	IN	50	lignocellulosic	450	9.1	465.4	6.2	75.0645	4									0.137808			1.13278
15	Wang et al., 2012	31.14	118.22			incubation		fine	upland	6.6	14.7	1.32	1.28	375	IN	50	lignocellulosic	450	9.1	465.4	6.2	75.0645	4									-0.115385			5.2933
16	Lan et al., 2018	-27.43	153.1	776	20	Field	1	coarse	upland	4.48	5.4	0.4	1.4	0	none	10	wood	550	6.95	650	0.9	722	3	0.0220334		-0.0924357	0.348538				0.269457				0.109978						1.02585	0.248073		0.530628	0.250295
16	Lan et al., 2018	-27.43	153.1	776	20	Field	1	coarse	upland	4.48	5.4	0.4	1.4	0	none	30	wood	550	6.95	650	0.9	722	3	0.0716298		-0.0757337	0.203652				0.563833				0.369641						0.783661	1.36172		0.641854	0.292259
16	Lan et al., 2018	-27.43	153.1	776	20	Field	1	coarse	upland	4.48	5.4	0.4	1.4	0	none	10	lignocellulosic	550	7.52	600	21.8	28	3	0.0372528		-0.0924357	0.122491				0.178113				0.11033						0.749428	1.079		0.693147	0.390056
16	Lan et al., 2018	-27.43	153.1	776	20	Field	1	coarse	upland	4.48	5.4	0.4	1.4	0	none	30	lignocellulosic	550	7.52	600	21.8	28	3	0.183421		-0.175818	0.00577463				0.330834				0.191571						1.13986	2.79775		0.79493	0.264479
16	Lan et al., 2018	-27.43	153.1	776	20	Field	1	coarse	upland	4.48	5.4	0.4	1.4	150	IN	10	wood	550	6.95	650	0.9	722	3	0.0300253			0.343064			0.92317	0.751694				-0.198751						-0.743663	0.904456		0.566395	0.451275
16	Lan et al., 2018	-27.43	153.1	776	20	Field	1	coarse	upland	4.48	5.4	0.4	1.4	150	IN	30	wood	550	6.95	650	0.9	722	3	0.039259			0.112631			1.53301	0.513971				-0.0615087						-0.276253	0.693147		1.0245	0.624433
16	Lan et al., 2018	-27.43	153.1	776	20	Field	1	coarse	upland	4.48	5.4	0.4	1.4	150	IN	10	lignocellulosic	550	7.52	600	21.8	28	3	0.0433803			0.0384032				-0.00889117				0.231443						-0.472964	0.693147		1.1713	0.324119
16	Lan et al., 2018	-27.43	153.1	776	20	Field	1	coarse	upland	4.48	5.4	0.4	1.4	150	IN	30	lignocellulosic	550	7.52	600	21.8	28	3	0.157708			0.103848				-0.0861703				0.787055							1.92038		1.63529	1.33418
16	Lan et al., 2018	-27.43	153.1	776	20	Field	1	coarse	upland	4.48	5.4	0.4	1.4	150	IN	0							3	-0.0074537			0.081527				0.0037885				1.21256						1.45248	5.10624		0.182322	0.160682
16	Lan et al., 2018	-27.43	153.1	776	20	Field	1	coarse	upland	4.48	5.4	0.4	1.4	150	IN	10	wood	550	6.95	650	0.9	722	3	0.0225716			0.424591				0.755483				1.01381						0.708813	6.0107		0.748717	0.611957
16	Lan et al., 2018	-27.43	153.1	776	20	Field	1	coarse	upland	4.48	5.4	0.4	1.4	150	IN	30	wood	550	6.95	650	0.9	722	3	0.0318053			0.194158				0.51776				1.15105						1.17622	5.79939		1.20683	0.785116
16	Lan et al., 2018	-27.43	153.1	776	20	Field	1	coarse	upland	4.48	5.4	0.4	1.4	150	IN	10	lignocellulosic	550	7.52	600	21.8	28	3	0.0359266			0.11993				-0.00510267				1.44401						0.979513	5.79939		1.35362	0.484802
16	Lan et al., 2018	-27.43	153.1	776	20	Field	1	coarse	upland	4.48	5.4	0.4	1.4	150	IN	30	lignocellulosic	550	7.52	600	21.8	28	3	0.150255			0.185375				-0.0823818				1.99962							7.02662		1.81761	1.49486
16	Lan et al., 2018	-27.43	153.1	776	20	Field	1	coarse	upland	4.48	5.4	0.4	1.4	150	IN	10	wood	550	6.95	650	0.9	722	3	0.000538112			0.0760538				0.486026				0.903835						-0.31704	5.76262		0.218089	0.361662
16	Lan et al., 2018	-27.43	153.1	776	20	Field	1	coarse	upland	4.48	5.4	0.4	1.4	150	IN	30	wood	550	6.95	650	0.9	722	3	-0.0398245			-0.00949344				-0.046073				0.781414						0.392562	4.43766		0.564972	0.492857
16	Lan et al., 2018	-27.43	153.1	776	20	Field	1	coarse	upland	4.48	5.4	0.4	1.4	150	IN	10	lignocellulosic	550	7.52	600	21.8	28	3	-0.0013262			-0.0025612				-0.183216				1.33368						0.230085	4.72038		0.660476	0.0947454
16	Lan et al., 2018	-27.43	153.1	776	20	Field	1	coarse	upland	4.48	5.4	0.4	1.4	150	IN	30	lignocellulosic	550	7.52	600	21.8	28	3	-0.0331663			0.1796				-0.413216				1.80805							4.22886		1.02268	1.23038
17	Augustenborg et al., 2012	52.51	-6.54			incubation		fine	upland					0	None	61.6	herbaceous	550	8.7	864	4	216	4												-1.73125
17	Augustenborg et al., 2012	52.51	-6.54			incubation		fine	upland					100	IN	61.6	herbaceous	550	8.7	864	4	216	4												1.2331
17	Augustenborg et al., 2012	52.51	-6.54			incubation		fine	upland					100	IN	0	herbaceous	550	8.7	864	4	216	4												-1.82901
17	Augustenborg et al., 2012	52.51	-6.54			incubation		fine	upland					100	IN	61.6	herbaceous	550	8.7	864	4	216	4												-0.595915
17	Augustenborg et al., 2012	52.51	-6.54			incubation		fine	upland					100	IN	61.6	herbaceous	550	8.7	864	4	216	4												1.13534
18	Sánchez-García et al., 2014	38.23	-1.22			incubation		coarse	upland	8.01	16.8	2.4		0	None	30.21	biowaste	550	7.87	701.7	2.7	259.889	4						-0.221049	-0.00394604					-0.203828
18	Sánchez-García et al., 2014	38.23	-1.22			incubation		coarse	upland	8.01	16.8	2.4		200	IN	30.21	biowaste	550	7.87	701.7	2.7	259.889	4						-0.624643	0.578132					0.20418
18	Sánchez-García et al., 2014	38.23	-1.22			incubation		coarse	upland	8.01	16.8	2.4		200	IN	0	biowaste	550	7.87	701.7	2.7	259.889	4						-0.418784	0.033597					0.249737
18	Sánchez-García et al., 2014	38.23	-1.22			incubation		coarse	upland	8.01	16.8	2.4		200	IN	30.21	biowaste	550	7.87	701.7	2.7	259.889	4						-1.04343	0.611729					0.453917
18	Sánchez-García et al., 2014	38.23	-1.22			incubation		coarse	upland	8.01	16.8	2.4		200	IN	30.21	biowaste	550	7.87	701.7	2.7	259.889	4						-0.822378	0.615675					0.657745
18	Sánchez-García et al., 2014	38.23	-1.22			incubation		coarse	upland	8.01	16.8	2.4		0	None	30.21	biowaste	550	7.87	701.7	2.7	259.889	4						-0.221049	-0.00394604					-0.203828
18	Sánchez-García et al., 2014	38.23	-1.22			incubation		coarse	upland	8.01	16.8	2.4		200	IN	30.21	biowaste	550	7.87	701.7	2.7	259.889	4						-0.12112	-0.00477631					0.0355067
18	Sánchez-García et al., 2014	38.23	-1.22			incubation		coarse	upland	8.01	16.8	2.4		200	IN	0	biowaste	550	7.87	701.7	2.7	259.889	4						0.634852	-0.0987879					-0.529919
18	Sánchez-García et al., 2014	38.23	-1.22			incubation		coarse	upland	8.01	16.8	2.4		200	IN	30.21	biowaste	550	7.87	701.7	2.7	259.889	4						0.513732	-0.103564					-0.494413
18	Sánchez-García et al., 2014	38.23	-1.22			incubation		coarse	upland	8.01	16.8	2.4		200	IN	30.21	biowaste	550	7.87	701.7	2.7	259.889	4						0.734781	-0.0996182					-0.290585
19	Sun et al., 2014	31.59	118.51			pot		medium	upland	5.1	11.6	1.4	1	0	None	30	herbaceous	450	9.4	467	5.6	83.3929	3									0.240836			-0.20377
19	Sun et al., 2014	31.59	118.51			pot		medium	upland	5.1	11.6	1.4	1	60	IN	30	herbaceous	450	9.4	467	5.6	83.3929	3									-6.63946e-05			-0.189542
19	Sun et al., 2014	31.59	118.51			pot		medium	upland	5.1	11.6	1.4	1	120	IN	30	herbaceous	450	9.4	467	5.6	83.3929	3									-0.0264936			-0.260353
19	Sun et al., 2014	31.59	118.51			pot		medium	upland	5.1	11.6	1.4	1	60	IN	0							3									0.127489			0.254992
19	Sun et al., 2014	31.59	118.51			pot		medium	upland	5.1	11.6	1.4	1	120	IN	0							3									0.193962			0.714145
19	Sun et al., 2014	31.59	118.51			pot		medium	upland	5.1	11.6	1.4	1	60	IN	30							3									0.127423			0.0654499
19	Sun et al., 2014	31.59	118.51			pot		medium	upland	5.1	11.6	1.4	1	120	IN	30							3									0.167469			0.453792
19	Sun et al., 2014	31.59	118.51			pot		medium	upland	5.1	11.6	1.4	1	60	IN	30							3									-0.113413			0.26922
19	Sun et al., 2014	31.59	118.51			pot		medium	upland	5.1	11.6	1.4	1	120	IN	30							3									-0.0733673			0.657562
19	Sun et al., 2014	32.04	118.5			pot		coarse	upland	5.2	40.1	1.2	0.9	0	None	30	herbaceous	450	9.4	467	5.6	83.3929	3									-0.305014			-0.220136
19	Sun et al., 2014	32.04	118.5			pot		coarse	upland	5.2	40.1	1.2	0.9	60	IN	30	herbaceous	450	9.4	467	5.6	83.3929	3									-0.445804			-0.476675
19	Sun et al., 2014	32.04	118.5			pot		coarse	upland	5.2	40.1	1.2	0.9	120	IN	30	herbaceous	450	9.4	467	5.6	83.3929	3									-0.379222			-0.211915
19	Sun et al., 2014	32.04	118.5			pot		coarse	upland	5.2	40.1	1.2	0.9	60	IN	0							3									0.15288			0.986536
19	Sun et al., 2014	32.04	118.5			pot		coarse	upland	5.2	40.1	1.2	0.9	120	IN	0							3									0.11852			1.43852
19	Sun et al., 2014	32.04	118.5			pot		coarse	upland	5.2	40.1	1.2	0.9	60	IN	30							3									-0.292923			0.509861
19	Sun et al., 2014	32.04	118.5			pot		coarse	upland	5.2	40.1	1.2	0.9	120	IN	30							3									-0.260703			1.22661
19	Sun et al., 2014	32.04	118.5			pot		coarse	upland	5.2	40.1	1.2	0.9	60	IN	30							3									0.0120914			0.729997
19	Sun et al., 2014	32.04	118.5			pot		coarse	upland	5.2	40.1	1.2	0.9	120	IN	30							3									0.0443117			1.44674
20	Angst et al., 2013	55.95	-3.34		27.5	pot		coarse	upland	6.7	10.2	0.4		0	None	69	wood	500	6.3	746	4.7	158.723	4	0.0597192	0.725633				-0.693147	-0.559616					-1.67398					0.326853
20	Angst et al., 2013	55.95	-3.34		27.5	pot		coarse	upland	6.7	10.2	0.4		120	IN	69	wood	500	6.3	746	4.7	158.723	4	0.0157484	0.618387				0	-0.405465					-0.834798					0.298153
20	Angst et al., 2013	55.95	-3.34		27.5	pot		coarse	upland	6.7	10.2	0.4		120	OF	69	wood	500	6.3	746	4.7	158.723	4	0.0800427	0.826679				-0.847298	0.559616					-0.587787					0.287682
20	Angst et al., 2013	55.95	-3.34		27.5	pot		coarse	upland	6.7	10.2	0.4		120	OF	69	wood	500	6.3	746	4.7	158.723	4	0.0813456	0.814844				0.405465	0					-1.0229					0.269509
20	Angst et al., 2013	55.95	-3.34		27.5	pot		coarse	upland	6.7	10.2	0.4		120	IN	0	wood	500	6.3	746	4.7	158.723	4	-0.0312525	0.107246				-0.693147	0.251314					0.504556					-0.0208341
20	Angst et al., 2013	55.95	-3.34		27.5	pot		coarse	upland	6.7	10.2	0.4		120	OF	0	wood	500	6.3	746	4.7	158.723	4	-0.0800427	-0.232622				1.25276	-0.559616					-0.575364					0.187463
20	Angst et al., 2013	55.95	-3.34		27.5	pot		coarse	upland	6.7	10.2	0.4		120	OF	0	wood	500	6.3	746	4.7	158.723	4	-0.0968498	-0.220788				0	0.251314					1.0229					0.195974
20	Angst et al., 2013	55.95	-3.34		27.5	pot		coarse	upland	6.7	10.2	0.4		120	IN	69	wood	500	6.3	746	4.7	158.723	4	-0.0155042	0.725633				-0.693147	-0.154151					-0.330242					0.277319
20	Angst et al., 2013	55.95	-3.34		27.5	pot		coarse	upland	6.7	10.2	0.4		120	OF	69	wood	500	6.3	746	4.7	158.723	4	0	0.594056				0.405465	0					-1.16315					0.475145
20	Angst et al., 2013	55.95	-3.34		27.5	pot		coarse	upland	6.7	10.2	0.4		120	OF	69	wood	500	6.3	746	4.7	158.723	4	-0.0155042	0.594056				0.405465	0.251314					0					0.465483
20	Angst et al., 2013	55.95	-3.34		27.5	pot		coarse	upland	6.7	10.2	0.4		120	IN	69	wood	500	6.3	746	4.7	158.723	4	-0.0752234	0				0	0.405465					1.34373					-0.0495339
20	Angst et al., 2013	55.95	-3.34		27.5	pot		coarse	upland	6.7	10.2	0.4		120	OF	69	wood	500	6.3	746	4.7	158.723	4	-0.0597192	-0.131576				1.09861	0.559616					0.510826					0.148292
20	Angst et al., 2013	55.95	-3.34		27.5	pot		coarse	upland	6.7	10.2	0.4		120	OF	69	wood	500	6.3	746	4.7	158.723	4	-0.0752234	-0.131576				1.09861	0.81093					1.67398					0.13863
21	Li et al., 2015	32.01	118.52	1107	15.4	Field	0.246575	medium	upland	5.1	15.9	2.1		0	None	20	herbaceous	400	9.4	467	5.6	83.3929	3												0.375789
21	Li et al., 2015	32.01	118.52	1107	15.4	Field	0.246575	medium	upland	5.1	15.9	2.1		0	None	40	herbaceous	400	9.4	467	5.6	83.3929	3												0.552069
21	Li et al., 2015	32.01	118.52	1107	15.4	Field	0.246575	medium	upland	5.1	15.9	2.1		312.5	IN	20	herbaceous	400	9.4	467	5.6	83.3929	3												0.0317487
21	Li et al., 2015	32.01	118.52	1107	15.4	Field	0.246575	medium	upland	5.1	15.9	2.1		312.5	IN	40	herbaceous	400	9.4	467	5.6	83.3929	3												-0.13815
21	Li et al., 2015	32.01	118.52	1107	15.4	Field	0.246575	medium	upland	5.1	15.9	2.1		416.7	IN	20	herbaceous	400	9.4	467	5.6	83.3929	3												-0.108481
21	Li et al., 2015	32.01	118.52	1107	15.4	Field	0.246575	medium	upland	5.1	15.9	2.1		416.7	IN	40	herbaceous	400	9.4	467	5.6	83.3929	3												-0.108481
21	Li et al., 2015	32.01	118.52	1107	15.4	Field	0.246575	medium	upland	5.1	15.9	2.1		312.5	IN	0	herbaceous	400	9.4	467	5.6	83.3929	3												0.489548
21	Li et al., 2015	32.01	118.52	1107	15.4	Field	0.246575	medium	upland	5.1	15.9	2.1		416.7	IN	0	herbaceous	400	9.4	467	5.6	83.3929	3												0.629778
21	Li et al., 2015	32.01	118.52	1107	15.4	Field	0.246575	medium	upland	5.1	15.9	2.1		312.5	IN	20	herbaceous	400	9.4	467	5.6	83.3929	3												0.521297
21	Li et al., 2015	32.01	118.52	1107	15.4	Field	0.246575	medium	upland	5.1	15.9	2.1		312.5	IN	40	herbaceous	400	9.4	467	5.6	83.3929	3												0.351398
21	Li et al., 2015	32.01	118.52	1107	15.4	Field	0.246575	medium	upland	5.1	15.9	2.1		416.7	IN	20	herbaceous	400	9.4	467	5.6	83.3929	3												0.521297
21	Li et al., 2015	32.01	118.52	1107	15.4	Field	0.246575	medium	upland	5.1	15.9	2.1		416.7	IN	40	herbaceous	400	9.4	467	5.6	83.3929	3												0.521297
21	Li et al., 2015	32.01	118.52	1107	15.4	Field	0.246575	medium	upland	5.1	15.9	2.1		312.5	IN	20	herbaceous	400	9.4	467	5.6	83.3929	3												0.145508
21	Li et al., 2015	32.01	118.52	1107	15.4	Field	0.246575	medium	upland	5.1	15.9	2.1		312.5	IN	40	herbaceous	400	9.4	467	5.6	83.3929	3												-0.200671
21	Li et al., 2015	32.01	118.52	1107	15.4	Field	0.246575	medium	upland	5.1	15.9	2.1		416.7	IN	20	herbaceous	400	9.4	467	5.6	83.3929	3												0.145508
21	Li et al., 2015	32.01	118.52	1107	15.4	Field	0.246575	medium	upland	5.1	15.9	2.1		416.7	IN	40	herbaceous	400	9.4	467	5.6	83.3929	3												-0.0307717
21	Li et al., 2015	32.01	118.52	1107	15.4	Field	0.328767	medium	upland	5.1	15.9	2.1		0	None	20	herbaceous	400	9.4	467	5.6	83.3929	3												0.00790518
21	Li et al., 2015	32.01	118.52	1107	15.4	Field	0.328767	medium	upland	5.1	15.9	2.1		0	None	40	herbaceous	400	9.4	467	5.6	83.3929	3												0.00790518
21	Li et al., 2015	32.01	118.52	1107	15.4	Field	0.328767	medium	upland	5.1	15.9	2.1		600	IN	20	herbaceous	400	9.4	467	5.6	83.3929	3												0.22437
21	Li et al., 2015	32.01	118.52	1107	15.4	Field	0.328767	medium	upland	5.1	15.9	2.1		600	IN	40	herbaceous	400	9.4	467	5.6	83.3929	3												0.248584
21	Li et al., 2015	32.01	118.52	1107	15.4	Field	0.328767	medium	upland	5.1	15.9	2.1		800	IN	20	herbaceous	400	9.4	467	5.6	83.3929	3												-0.015326
21	Li et al., 2015	32.01	118.52	1107	15.4	Field	0.328767	medium	upland	5.1	15.9	2.1		800	IN	40	herbaceous	400	9.4	467	5.6	83.3929	3												-0.368147
21	Li et al., 2015	32.01	118.52	1107	15.4	Field	0.328767	medium	upland	5.1	15.9	2.1		600	IN	0	herbaceous	400	9.4	467	5.6	83.3929	3												0.257468
21	Li et al., 2015	32.01	118.52	1107	15.4	Field	0.328767	medium	upland	5.1	15.9	2.1		800	IN	0	herbaceous	400	9.4	467	5.6	83.3929	3												0.735872
21	Li et al., 2015	32.01	118.52	1107	15.4	Field	0.328767	medium	upland	5.1	15.9	2.1		600	IN	20	herbaceous	400	9.4	467	5.6	83.3929	3												0.481838
21	Li et al., 2015	32.01	118.52	1107	15.4	Field	0.328767	medium	upland	5.1	15.9	2.1		600	IN	40	herbaceous	400	9.4	467	5.6	83.3929	3												0.506052
21	Li et al., 2015	32.01	118.52	1107	15.4	Field	0.328767	medium	upland	5.1	15.9	2.1		800	IN	20	herbaceous	400	9.4	467	5.6	83.3929	3												0.720546
21	Li et al., 2015	32.01	118.52	1107	15.4	Field	0.328767	medium	upland	5.1	15.9	2.1		800	IN	40	herbaceous	400	9.4	467	5.6	83.3929	3												0.367725
21	Li et al., 2015	32.01	118.52	1107	15.4	Field	0.328767	medium	upland	5.1	15.9	2.1		600	IN	20	herbaceous	400	9.4	467	5.6	83.3929	3												0.473933
21	Li et al., 2015	32.01	118.52	1107	15.4	Field	0.328767	medium	upland	5.1	15.9	2.1		600	IN	40	herbaceous	400	9.4	467	5.6	83.3929	3												0.498147
21	Li et al., 2015	32.01	118.52	1107	15.4	Field	0.328767	medium	upland	5.1	15.9	2.1		800	IN	20	herbaceous	400	9.4	467	5.6	83.3929	3												0.712641
21	Li et al., 2015	32.01	118.52	1107	15.4	Field	0.328767	medium	upland	5.1	15.9	2.1		800	IN	40	herbaceous	400	9.4	467	5.6	83.3929	3												0.35982
21	Li et al., 2015	32.01	118.52	1107	15.4	Field	0.328767	medium	upland	5.1	15.9	2.1		0	None	20	herbaceous	400	9.4	467	5.6	83.3929	3												0.154151
21	Li et al., 2015	32.01	118.52	1107	15.4	Field	0.328767	medium	upland	5.1	15.9	2.1		0	None	40	herbaceous	400	9.4	467	5.6	83.3929	3												0.510826
21	Li et al., 2015	32.01	118.52	1107	15.4	Field	0.328767	medium	upland	5.1	15.9	2.1		250	IN	20	herbaceous	400	9.4	467	5.6	83.3929	3												-0.241162
21	Li et al., 2015	32.01	118.52	1107	15.4	Field	0.328767	medium	upland	5.1	15.9	2.1		250	IN	40	herbaceous	400	9.4	467	5.6	83.3929	3												-0.441833
21	Li et al., 2015	32.01	118.52	1107	15.4	Field	0.328767	medium	upland	5.1	15.9	2.1		333.3	IN	20	herbaceous	400	9.4	467	5.6	83.3929	3												0.485508
21	Li et al., 2015	32.01	118.52	1107	15.4	Field	0.328767	medium	upland	5.1	15.9	2.1		333.3	IN	40	herbaceous	400	9.4	467	5.6	83.3929	3												-0.0645385
21	Li et al., 2015	32.01	118.52	1107	15.4	Field	0.328767	medium	upland	5.1	15.9	2.1		250	IN	0	herbaceous	400	9.4	467	5.6	83.3929	3												0.847298
21	Li et al., 2015	32.01	118.52	1107	15.4	Field	0.328767	medium	upland	5.1	15.9	2.1		333.3	IN	0	herbaceous	400	9.4	467	5.6	83.3929	3												0.980829
21	Li et al., 2015	32.01	118.52	1107	15.4	Field	0.328767	medium	upland	5.1	15.9	2.1		250	IN	20	herbaceous	400	9.4	467	5.6	83.3929	3												0.606136
21	Li et al., 2015	32.01	118.52	1107	15.4	Field	0.328767	medium	upland	5.1	15.9	2.1		250	IN	40	herbaceous	400	9.4	467	5.6	83.3929	3												0.405465
21	Li et al., 2015	32.01	118.52	1107	15.4	Field	0.328767	medium	upland	5.1	15.9	2.1		333.3	IN	20	herbaceous	400	9.4	467	5.6	83.3929	3												1.46634
21	Li et al., 2015	32.01	118.52	1107	15.4	Field	0.328767	medium	upland	5.1	15.9	2.1		333.3	IN	40	herbaceous	400	9.4	467	5.6	83.3929	3												0.916291
21	Li et al., 2015	32.01	118.52	1107	15.4	Field	0.328767	medium	upland	5.1	15.9	2.1		250	IN	20	herbaceous	400	9.4	467	5.6	83.3929	3												0.451985
21	Li et al., 2015	32.01	118.52	1107	15.4	Field	0.328767	medium	upland	5.1	15.9	2.1		250	IN	40	herbaceous	400	9.4	467	5.6	83.3929	3												-0.105361
21	Li et al., 2015	32.01	118.52	1107	15.4	Field	0.328767	medium	upland	5.1	15.9	2.1		333.3	IN	20	herbaceous	400	9.4	467	5.6	83.3929	3												1.31219
21	Li et al., 2015	32.01	118.52	1107	15.4	Field	0.328767	medium	upland	5.1	15.9	2.1		333.3	IN	40	herbaceous	400	9.4	467	5.6	83.3929	3												0.405465
21	Li et al., 2015	32.01	118.52	1107	15.4	Field	0.164384	medium	upland	5.1	15.9	2.1		0	None	20	herbaceous	400	9.4	467	5.6	83.3929	3												0.154151
21	Li et al., 2015	32.01	118.52	1107	15.4	Field	0.164384	medium	upland	5.1	15.9	2.1		0	None	40	herbaceous	400	9.4	467	5.6	83.3929	3												0.154151
21	Li et al., 2015	32.01	118.52	1107	15.4	Field	0.164384	medium	upland	5.1	15.9	2.1		312.5	IN	20	herbaceous	400	9.4	467	5.6	83.3929	3												-0.241162
21	Li et al., 2015	32.01	118.52	1107	15.4	Field	0.164384	medium	upland	5.1	15.9	2.1		312.5	IN	40	herbaceous	400	9.4	467	5.6	83.3929	3												-0.336472
21	Li et al., 2015	32.01	118.52	1107	15.4	Field	0.164384	medium	upland	5.1	15.9	2.1		416.7	IN	20	herbaceous	400	9.4	467	5.6	83.3929	3												-0.0571584
21	Li et al., 2015	32.01	118.52	1107	15.4	Field	0.164384	medium	upland	5.1	15.9	2.1		416.7	IN	40	herbaceous	400	9.4	467	5.6	83.3929	3												-0.492476
21	Li et al., 2015	32.01	118.52	1107	15.4	Field	0.164384	medium	upland	5.1	15.9	2.1		312.5	IN	0	herbaceous	400	9.4	467	5.6	83.3929	3												0.847298
21	Li et al., 2015	32.01	118.52	1107	15.4	Field	0.164384	medium	upland	5.1	15.9	2.1		416.7	IN	0	herbaceous	400	9.4	467	5.6	83.3929	3												1.79176
21	Li et al., 2015	32.01	118.52	1107	15.4	Field	0.164384	medium	upland	5.1	15.9	2.1		312.5	IN	20	herbaceous	400	9.4	467	5.6	83.3929	3												0.606136
21	Li et al., 2015	32.01	118.52	1107	15.4	Field	0.164384	medium	upland	5.1	15.9	2.1		312.5	IN	40	herbaceous	400	9.4	467	5.6	83.3929	3												0.510826
21	Li et al., 2015	32.01	118.52	1107	15.4	Field	0.164384	medium	upland	5.1	15.9	2.1		416.7	IN	20	herbaceous	400	9.4	467	5.6	83.3929	3												1.7346
21	Li et al., 2015	32.01	118.52	1107	15.4	Field	0.164384	medium	upland	5.1	15.9	2.1		416.7	IN	40	herbaceous	400	9.4	467	5.6	83.3929	3												1.29928
21	Li et al., 2015	32.01	118.52	1107	15.4	Field	0.164384	medium	upland	5.1	15.9	2.1		312.5	IN	20	herbaceous	400	9.4	467	5.6	83.3929	3												0.451985
21	Li et al., 2015	32.01	118.52	1107	15.4	Field	0.164384	medium	upland	5.1	15.9	2.1		312.5	IN	40	herbaceous	400	9.4	467	5.6	83.3929	3												0.356675
21	Li et al., 2015	32.01	118.52	1107	15.4	Field	0.164384	medium	upland	5.1	15.9	2.1		416.7	IN	20	herbaceous	400	9.4	467	5.6	83.3929	3												1.58045
21	Li et al., 2015	32.01	118.52	1107	15.4	Field	0.164384	medium	upland	5.1	15.9	2.1		416.7	IN	40	herbaceous	400	9.4	467	5.6	83.3929	3												1.14513
21	Li et al., 2015	32.01	118.52	1107	15.4	Field	1.10959	medium	upland	5.1	15.9	2.1		0	None	20	herbaceous	400	9.4	467	5.6	83.3929	3										0.704576		0.138646	0.150473
21	Li et al., 2015	32.01	118.52	1107	15.4	Field	1.10959	medium	upland	5.1	15.9	2.1		0	None	40	herbaceous	400	9.4	467	5.6	83.3929	3										0.615496		0.220062	0.227615
21	Li et al., 2015	32.01	118.52	1107	15.4	Field	1.10959	medium	upland	5.1	15.9	2.1		1475	IN	20	herbaceous	400	9.4	467	5.6	83.3929	3										1.16227		0.0909718	0.107194
21	Li et al., 2015	32.01	118.52	1107	15.4	Field	1.10959	medium	upland	5.1	15.9	2.1		1475	IN	40	herbaceous	400	9.4	467	5.6	83.3929	3										1.57213		0.0497615	0.0798389
21	Li et al., 2015	32.01	118.52	1107	15.4	Field	1.10959	medium	upland	5.1	15.9	2.1		1967	IN	20	herbaceous	400	9.4	467	5.6	83.3929	3										0.413976		-0.0167268	-0.0114804
21	Li et al., 2015	32.01	118.52	1107	15.4	Field	1.10959	medium	upland	5.1	15.9	2.1		1967	IN	40	herbaceous	400	9.4	467	5.6	83.3929	3										0.658361		-0.292433	-0.277037
21	Li et al., 2015	32.01	118.52	1107	15.4	Field	1.10959	medium	upland	5.1	15.9	2.1		1475	IN	0	herbaceous	400	9.4	467	5.6	83.3929	3										-0.203228		0.41058	0.403384
21	Li et al., 2015	32.01	118.52	1107	15.4	Field	1.10959	medium	upland	5.1	15.9	2.1		1967	IN	0	herbaceous	400	9.4	467	5.6	83.3929	3										0.296266		0.772006	0.766071
21	Li et al., 2015	32.01	118.52	1107	15.4	Field	1.10959	medium	upland	5.1	15.9	2.1		312.5	IN	20	herbaceous	400	9.4	467	5.6	83.3929	3										0.959042		0.501552	0.510579
21	Li et al., 2015	32.01	118.52	1107	15.4	Field	1.10959	medium	upland	5.1	15.9	2.1		312.5	IN	40	herbaceous	400	9.4	467	5.6	83.3929	3										1.3689		0.460342	0.483223
21	Li et al., 2015	32.01	118.52	1107	15.4	Field	1.10959	medium	upland	5.1	15.9	2.1		416.7	IN	20	herbaceous	400	9.4	467	5.6	83.3929	3										0.710242		0.755279	0.75459
21	Li et al., 2015	32.01	118.52	1107	15.4	Field	1.10959	medium	upland	5.1	15.9	2.1		416.7	IN	40	herbaceous	400	9.4	467	5.6	83.3929	3										0.954627		0.479573	0.489033
21	Li et al., 2015	32.01	118.52	1107	15.4	Field	1.10959	medium	upland	5.1	15.9	2.1		312.5	IN	20	herbaceous	400	9.4	467	5.6	83.3929	3										0.254466		0.362905	0.360106
21	Li et al., 2015	32.01	118.52	1107	15.4	Field	1.10959	medium	upland	5.1	15.9	2.1		312.5	IN	40	herbaceous	400	9.4	467	5.6	83.3929	3										0.753406		0.24028	0.255609
21	Li et al., 2015	32.01	118.52	1107	15.4	Field	1.10959	medium	upland	5.1	15.9	2.1		416.7	IN	20	herbaceous	400	9.4	467	5.6	83.3929	3										0.00566574		0.616632	0.604118
21	Li et al., 2015	32.01	118.52	1107	15.4	Field	1.10959	medium	upland	5.1	15.9	2.1		416.7	IN	40	herbaceous	400	9.4	467	5.6	83.3929	3										0.339131		0.259511	0.261419
22	Hawthorne et al., 2017	49.52	-125.2			incubation		coarse	upland					0	None	18	wood	420	6.86				4									0.150874	-0.402756		0.0267622	0.148532
22	Hawthorne et al., 2017	49.52	-125.2			incubation		coarse	upland					0	None	180	wood	420	6.86				4									0.398052	-2.02928		1.07911	0.397879
22	Hawthorne et al., 2017	49.52	-125.2			incubation		coarse	upland					200	IN	18	wood	420	6.86				4									0.103708	-0.138777		-0.332408	0.100169
22	Hawthorne et al., 2017	49.52	-125.2			incubation		coarse	upland					200	IN	180	wood	420	6.86				4									0.285653	-1.32943		0.0255187	0.282274
22	Hawthorne et al., 2017	49.52	-125.2			incubation		coarse	upland					200	IN	0	wood	420	6.86				4									0.149306	-0.840323		0.974702	0.660779
22	Hawthorne et al., 2017	49.52	-125.2			incubation		coarse	upland					200	IN	18	wood	420	6.86				4									0.253014	-0.9791		0.642294	0.343579
22	Hawthorne et al., 2017	49.52	-125.2			incubation		coarse	upland					200	IN	180	wood	420	6.86				4									0.434959	-2.16976		1.00022	0.631601
22	Hawthorne et al., 2017	49.52	-125.2			incubation		coarse	upland					200	IN	18	wood	420	6.86				4									0.10214	-0.576344		0.615532	0.436024
22	Hawthorne et al., 2017	49.52	-125.2			incubation		coarse	upland					200	IN	180	wood	420	6.86				4									0.0369071	-0.140473		-0.0788883	-0.080129
23	Chen et al., 2015	36	127	1226.5	12.5	Field	1.41667	coarse	upland	7.2	4.23	0.58	1.27	0	None	3.3	lignocellulosic	600	10.3	429	11	39	3				-0.0892457								-0.0632488
23	Chen et al., 2015	36	127	1226.5	12.5	Field	1.41667	coarse	upland	7.2	4.23	0.58	1.27	51.8	IN	3.3	lignocellulosic	600	10.3	429	11	39	3				-0.0289755								0.0364174
23	Chen et al., 2015	36	127	1226.5	12.5	Field	1.41667	coarse	upland	7.2	4.23	0.58	1.27	11.3	OF	3.3	lignocellulosic	600	10.3	429	11	39	3				1.20013								0.400678
23	Chen et al., 2015	36	127	1226.5	12.5	Field	1.41667	coarse	upland	7.2	4.23	0.58	1.27	51.8	IN	0	lignocellulosic	600	10.3	429	11	39	3				0.284187								0.16058
23	Chen et al., 2015	36	127	1226.5	12.5	Field	1.41667	coarse	upland	7.2	4.23	0.58	1.27	11.3	OF	0	lignocellulosic	600	10.3	429	11	39	3				-0.278056								0.453738
23	Chen et al., 2015	36	127	1226.5	12.5	Field	1.41667	coarse	upland	7.2	4.23	0.58	1.27	51.8	IN	3.3	lignocellulosic	600	10.3	429	11	39	3				0.2552								0.197
23	Chen et al., 2015	36	127	1226.5	12.5	Field	1.41667	coarse	upland	7.2	4.23	0.58	1.27	11.3	OF	3.3	lignocellulosic	600	10.3	429	11	39	3				0.9221								0.8544
23	Chen et al., 2015	36	127	1226.5	12.5	Field	1.41667	coarse	upland	7.2	4.23	0.58	1.27	51.8	IN	3.3	lignocellulosic	600	10.3	429	11	39	3				0.3445								0.2603
23	Chen et al., 2015	36	127	1226.5	12.5	Field	1.41667	coarse	upland	7.2	4.23	0.58	1.27	11.3	OF	3.3	lignocellulosic	600	10.3	429	11	39	3				1.0113								0.9177
24	Li et al., 2015	31.58	118.48	1050	15.7	Field	1	fine	upland	5.7	25.3	1.32		0	None	20	herbaceous	500	9.4	467	5.6	83.3929	3												-0.029853		0.226593
24	Li et al., 2015	31.58	118.48	1050	15.7	Field	1	fine	upland	5.7	25.3	1.32		250	IN	20	herbaceous	500	9.4	467	5.6	83.3929	3										-0.0376263		-0.0625928	-0.0532216	0.195529	-0.248751
24	Li et al., 2015	31.58	118.48	1050	15.7	Field	1	fine	upland	5.7	25.3	1.32		250	IN	40	herbaceous	500	9.4	467	5.6	83.3929	3										-0.119688		-0.234443	-0.190152	0.095482	-0.285634
24	Li et al., 2015	31.58	118.48	1050	15.7	Field	1	fine	upland	5.7	25.3	1.32		250	IN	0	herbaceous	500	9.4	467	5.6	83.3929	3												1.87857		0.603179
24	Li et al., 2015	31.58	118.48	1050	15.7	Field	1	fine	upland	5.7	25.3	1.32		250	IN	20	herbaceous	500	9.4	467	5.6	83.3929	3												1.81597		0.798708
24	Li et al., 2015	31.58	118.48	1050	15.7	Field	1	fine	upland	5.7	25.3	1.32		250	IN	40	herbaceous	500	9.4	467	5.6	83.3929	3												1.64412		0.698661
25	Li et al., 2016	35.12	107.4	578	9.1	Field	0.493151	medium	upland					225	IN	50	herbaceous	450					3									-0.0357206		-0.122602			0.106483
25	Li et al., 2016	35.12	107.4	578	9.1	Field	0.493151	medium	upland					225	IN	0	herbaceous	450					3									-0.0317179		-0.0253178			1.17082
25	Li et al., 2016	35.12	107.4	578	9.1	Field	0.493151	medium	upland					225	IN	50	herbaceous	450					3									-0.085638		-0.14792			1.2773
25	Li et al., 2016	35.12	107.4	578	9.1	Field	0.493151	medium	upland					225	IN	50	herbaceous	450					3									-0.0214011		-0.0294139			0.0623703
25	Li et al., 2016	35.12	107.4	578	9.1	Field	0.493151	medium	upland					225	IN	0	herbaceous	450					3									-0.0583747		-0.0143887			0.988116
25	Li et al., 2016	35.12	107.4	578	9.1	Field	0.493151	medium	upland					225	IN	50	herbaceous	450					3									-0.0797759		-0.0438026			1.05049
26	Wei et al., 2016	40.12	116.49			incubation			upland	7.22	23.58	1.44		0	None	48			9.76	374.4	2.25	166.4	4									-0.0992437
26	Wei et al., 2016	40.12	116.49			incubation			upland	7.22	23.58	1.44		0	None	96			9.76	374.4	2.25	166.4	4									0.0404217
26	Wei et al., 2016	40.12	116.49			incubation			upland	7.22	23.58	1.44			OF	48			9.76	374.4	2.25	166.4	4									0.0731488
26	Wei et al., 2016	40.12	116.49			incubation			upland	7.22	23.58	1.44			OF	96			9.76	374.4	2.25	166.4	4									0.145181
26	Wei et al., 2016	40.12	116.49			incubation			upland	7.22	23.58	1.44			IN	48			9.76	374.4	2.25	166.4	4									0.188738
26	Wei et al., 2016	40.12	116.49			incubation			upland	7.22	23.58	1.44			IN	96			9.76	374.4	2.25	166.4	4									0.171414
26	Wei et al., 2016	40.12	116.49			incubation			upland	7.22	23.58	1.44			IN+OF	48			9.76	374.4	2.25	166.4	4									0.258569
26	Wei et al., 2016	40.12	116.49			incubation			upland	7.22	23.58	1.44			IN+OF	96			9.76	374.4	2.25	166.4	4									0.328948
26	Wei et al., 2016	40.12	116.49			incubation			upland	7.22	23.58	1.44			OF	0			9.76	374.4	2.25	166.4	4									0.293654
26	Wei et al., 2016	40.12	116.49			incubation			upland	7.22	23.58	1.44			IN	0			9.76	374.4	2.25	166.4	4									-0.162148
26	Wei et al., 2016	40.12	116.49			incubation			upland	7.22	23.58	1.44			IN+OF	0			9.76	374.4	2.25	166.4	4									-0.00209497
26	Wei et al., 2016	40.12	116.49			incubation			upland	7.22	23.58	1.44			OF	48			9.76	374.4	2.25	166.4	4									0.366803
26	Wei et al., 2016	40.12	116.49			incubation			upland	7.22	23.58	1.44			OF	96			9.76	374.4	2.25	166.4	4									0.438835
26	Wei et al., 2016	40.12	116.49			incubation			upland	7.22	23.58	1.44			IN	48			9.76	374.4	2.25	166.4	4									0.0265898
26	Wei et al., 2016	40.12	116.49			incubation			upland	7.22	23.58	1.44			IN	96			9.76	374.4	2.25	166.4	4									0.00926562
26	Wei et al., 2016	40.12	116.49			incubation			upland	7.22	23.58	1.44			IN+OF	48			9.76	374.4	2.25	166.4	4									0.256474
26	Wei et al., 2016	40.12	116.49			incubation			upland	7.22	23.58	1.44			IN+OF	96			9.76	374.4	2.25	166.4	4									0.326853
27	Li et al.,2014	32.01	118.52	1107	15.3	Field	1	medium	upland	5.5	15.6	1.9	1.2	0	None	20	herbaceous		9.4		5.6		3										0.704576		0.138646	0.150473
27	Li et al.,2014	32.01	118.52	1107	15.3	Field	1	medium	upland	5.5	15.6	1.9	1.2	0	None	40	herbaceous		9.4		5.6		3										0.615496		0.220062	0.227615
27	Li et al.,2014	32.01	118.52	1107	15.3	Field	1	medium	upland	5.5	15.6	1.9	1.2		IN	20	herbaceous		9.4		5.6		3										0.413976		-0.0167268	-0.0114804
27	Li et al.,2014	32.01	118.52	1107	15.3	Field	1	medium	upland	5.5	15.6	1.9	1.2		IN	40	herbaceous		9.4		5.6		3										0.658361		-0.279814	-0.264731
27	Li et al.,2014	32.01	118.52	1107	15.3	Field	1	medium	upland	5.5	15.6	1.9	1.2			0	herbaceous		9.4		5.6		3										0.296266		0.772006	0.766071
27	Li et al.,2014	32.01	118.52	1107	15.3	Field	1	medium	upland	5.5	15.6	1.9	1.2		IN	20	herbaceous		9.4		5.6		3										0.710242		0.755279	0.75459
27	Li et al.,2014	32.01	118.52	1107	15.3	Field	1	medium	upland	5.5	15.6	1.9	1.2		IN	40	herbaceous		9.4		5.6		3										0.954627		0.492192	0.501339
27	Li et al.,2014	32.01	118.52	1107	15.3	Field	1	medium	upland	5.5	15.6	1.9	1.2		IN	20	herbaceous		9.4		5.6		3										0.00566574		0.616632	0.604118
27	Li et al.,2014	32.01	118.52	1107	15.3	Field	1	medium	upland	5.5	15.6	1.9	1.2		IN	40	herbaceous		9.4		5.6		3										0.339131		0.27213	0.273725
28	Zhang et al.,2012	31.03	104.1	890	16.3	Field	0.328767		upland	5.99	20.11	1.81		0	None	20	herbaceous	550	10.4	467	5.9	79.1525	3	0.042705	0.159137			0.0272496					0.62165		0	0.583026	-0.0241558	0.607182	-0.04567
28	Zhang et al.,2012	31.03	104.1	890	16.3	Field	0.328767		upland	5.99	20.11	1.81		0	None	40	herbaceous	550	10.4	467	5.9	79.1525	3	0.127624	0.435086			0.0326116					-0.693827		0.435318	-0.535717	-0.0107979	-0.524919	-0.0935261
28	Zhang et al.,2012	31.03	104.1	890	16.3	Field	0.328767		upland	5.99	20.11	1.81		240	IN	20	herbaceous	550	10.4	467	5.9	79.1525	3	0.0612615	0.111696			0.0381518					-0.556865		-0.346093	-0.434969	-0.0044346	-0.430535	0
28	Zhang et al.,2012	31.03	104.1	890	16.3	Field	0.328767		upland	5.99	20.11	1.81		240	IN	40	herbaceous	550	10.4	467	5.9	79.1525	3	0.122186	0.405796			0.0953102					-1.12033		-0.770534	-0.912197	0.00661524	-0.918812	-0.018519
28	Zhang et al.,2012	31.03	104.1	890	16.3	Field	0.328767		upland	5.99	20.11	1.81		240	IN	0	herbaceous	550	10.4	467	5.9	79.1525	3	-0.033721	-0.00742027			-0.00554018					0.210143		2.83855	0.92886	0.0758113	0.853048	-0.027151
28	Zhang et al.,2012	31.03	104.1	890	16.3	Field	0.328767		upland	5.99	20.11	1.81		240	IN	20	herbaceous	550	10.4	467	5.9	79.1525	3	0.0275405	0.104276			0.0326116					-0.346722		2.49245	0.49389	0.0713767	0.422514	-0.027151
28	Zhang et al.,2012	31.03	104.1	890	16.3	Field	0.328767		upland	5.99	20.11	1.81		240	IN	40	herbaceous	550	10.4	467	5.9	79.1525	3	0.0884647	0.398376			0.08977					-0.910191		2.06801	0.0166631	0.0824265	-0.0657634	-0.04567
28	Zhang et al.,2012	31.03	104.1	890	16.3	Field	0.328767		upland	5.99	20.11	1.81		240	IN	20	herbaceous	550	10.4	467	5.9	79.1525	3	-0.0151646	-0.0548615			0.00536194					-0.968372		2.49245	-0.0891358	0.0955324	-0.184668	0.018519
28	Zhang et al.,2012	31.03	104.1	890	16.3	Field	0.328767		upland	5.99	20.11	1.81		240	IN	40	herbaceous	550	10.4	467	5.9	79.1525	3	-0.0391593	-0.0367103			0.0571584					-0.216364		1.63269	0.55238	0.0932244	0.459156	0.047856
28	Zhang et al.,2012	31.03	104.1	890	16.3	Field	0.328767		upland	5.99	20.11	1.81		0	None	20	herbaceous	550	10.4	467	5.9	79.1525	3	0.0701184	0.113659			0.0106384					-0.817997		-1.33829	-1.1945	-0.0519815	-1.14252	-0.0616936
28	Zhang et al.,2012	31.03	104.1	890	16.3	Field	0.328767		upland	5.99	20.11	1.81		0	None	40	herbaceous	550	10.4	467	5.9	79.1525	3	0.0872929	0.436567			0.0967676					-0.645774		-1.47182	-1.21642	-0.138211	-1.07821	-0.127445
28	Zhang et al.,2012	31.03	104.1	890	16.3	Field	0.328767		upland	5.99	20.11	1.81		240	IN	20	herbaceous	550	10.4	467	5.9	79.1525	3	0.00817666	0.212313			0.105919					1.06873		-0.297694	-0.214595	-0.0109771	-0.203618	-0.0444518
28	Zhang et al.,2012	31.03	104.1	890	16.3	Field	0.328767		upland	5.99	20.11	1.81		240	IN	40	herbaceous	550	10.4	467	5.9	79.1525	3	0.0879688	0.427251			0.12582					1.44301		-1.0714	-0.781023	-0.0231926	-0.75783	-0.0628009
28	Zhang et al.,2012	31.03	104.1	890	16.3	Field	0.328767		upland	5.99	20.11	1.81		240	IN	0	herbaceous	550	10.4	467	5.9	79.1525	3	0.0283116	-0.0192472			-0.0437228					-1.39415		0.86586	0.639054	0.403284	0.23577	-0.0172418
28	Zhang et al.,2012	31.03	104.1	890	16.3	Field	0.328767		upland	5.99	20.11	1.81		240	IN	20	herbaceous	550	10.4	467	5.9	79.1525	3	0.0364883	0.193066			0.0621962					-0.325422		0.568166	0.424458	0.392307	0.0321514	-0.0616936
28	Zhang et al.,2012	31.03	104.1	890	16.3	Field	0.328767		upland	5.99	20.11	1.81		240	IN	40	herbaceous	550	10.4	467	5.9	79.1525	3	0.11628	0.408004			0.0820974					0.0488647		-0.20554	-0.141969	0.380091	-0.52206	-0.0800427
28	Zhang et al.,2012	31.03	104.1	890	16.3	Field	0.328767		upland	5.99	20.11	1.81		240	IN	20	herbaceous	550	10.4	467	5.9	79.1525	3	-0.0336301	0.0794068			0.0515578					0.492575		1.90645	1.61896	0.444289	1.17467	0
28	Zhang et al.,2012	31.03	104.1	890	16.3	Field	0.328767		upland	5.99	20.11	1.81		240	IN	40	herbaceous	550	10.4	467	5.9	79.1525	3	0.0289875	-0.0285632			-0.0146702					0.694639		1.26628	1.07445	0.518302	0.556151	0.0474022
29	Wang et al., 2020	32.07	118.86			incubation		fine	upland	4.69	13.91	1.35	1.27	0	None	#REF!	herbaceous	500					3	0.213574		0.337271			-0.815957	-1.00133		-0.0975443		-0.174041	-0.450834	-1.42674
29	Wang et al., 2020	32.07	118.86			incubation		fine	upland	4.69	13.91	1.35	1.27		IN		herbaceous	500					3	-0.13415		0.184197			0.720236	1.24996		0.113796		-0.756374	1.25965	-0.660812
29	Wang et al., 2020	32.07	118.86			incubation		fine	upland	4.69	13.91	1.35	1.27		IN	72	herbaceous	500					3	0.135424		0.395041			0.353518	0.562266		0.0393452		-0.309061	0.676887	-1.24488
30	Barracosa et al.,2020	40.64	-7.91			pot		coarse	upland	5.5	15.196		1.1	0	None	10	wood	900	10	806	1.9	424.211	3									-0.160414	0.92301		0.701515	0.353276
30	Barracosa et al.,2020	40.64	-7.91			pot		coarse	upland	5.5	15.196		1.1	25	IN	10	wood	900	10	806	1.9	424.211	3									0.0849069	0.15802		-0.442853	0.127658
30	Barracosa et al.,2020	40.64	-7.91			pot		coarse	upland	5.5	15.196		1.1	25	IN	0	wood	900	10	806	1.9	424.211	3									-0.0897183	0.989917		1.01084	0.990307
30	Barracosa et al.,2020	40.64	-7.91			pot		coarse	upland	5.5	15.196		1.1	25	IN	10	wood	900	10	806	1.9	424.211	3									-0.00481137	1.14794		0.567984	1.13979
30	Barracosa et al.,2020	40.64	-7.91			pot		coarse	upland	5.5	15.196		1.1	25	IN	10	wood	900	10	806	1.9	424.211	3									0.155603	0.224928		-0.133531	0.220451
31	Rizhiya et al.,2020	48.19	18.09			incubation		medium	upland	6.1	13	1.38	1.31	0	None	3	biowaste	550	8.5	531	14	37.9286	5									0.113338			0.214216
31	Rizhiya et al.,2020	48.19	18.09			incubation		medium	upland	6.1	13	1.38	1.31		OF	3	biowaste	550	8.5	531	14	37.9286	5									-0.0112278			-0.586584
31	Rizhiya et al.,2020	48.19	18.09			incubation		medium	upland	6.1	13	1.38	1.31	115	IN	3	biowaste	550	8.5	531	14	37.9286	5									-0.0856036			-0.164327
31	Rizhiya et al.,2020	48.19	18.09			incubation		medium	upland	6.1	13	1.38	1.31	115	IN+OF	3	biowaste	550	8.5	531	14	37.9286	5									-0.763612			-1.26485
31	Rizhiya et al.,2020	48.19	18.09			incubation		medium	upland	6.1	13	1.38	1.31		OF	0	biowaste	550	8.5	531	14	37.9286	5									0.206416			1.01764
31	Rizhiya et al.,2020	48.19	18.09			incubation		medium	upland	6.1	13	1.38	1.31	115	IN	0	biowaste	550	8.5	531	14	37.9286	5									1.0016			2.07387
31	Rizhiya et al.,2020	48.19	18.09			incubation		medium	upland	6.1	13	1.38	1.31	115	IN+OF	0	biowaste	550	8.5	531	14	37.9286	5									1.0404			2.22463
31	Rizhiya et al.,2020	48.19	18.09			incubation		medium	upland	6.1	13	1.38	1.31		OF	3	biowaste	550	8.5	531	14	37.9286	5									0.195189			0.431061
31	Rizhiya et al.,2020	48.19	18.09			incubation		medium	upland	6.1	13	1.38	1.31	115	IN+OF	3	biowaste	550	8.5	531	14	37.9286	5									0.915992			1.90954
31	Rizhiya et al.,2020	48.19	18.09			incubation		medium	upland	6.1	13	1.38	1.31	115	IN	3	biowaste	550	8.5	531	14	37.9286	5									0.27679			0.959776
31	Rizhiya et al.,2020	48.19	18.09			incubation		medium	upland	6.1	13	1.38	1.31	0	None	6	biowaste	550	8.5	531	14	37.9286	5									0.220884			0.225339
31	Rizhiya et al.,2020	48.19	18.09			incubation		medium	upland	6.1	13	1.38	1.31		OF	6	biowaste	550	8.5	531	14	37.9286	5									-0.0845246			-0.443932
31	Rizhiya et al.,2020	48.19	18.09			incubation		medium	upland	6.1	13	1.38	1.31	230	IN	6	biowaste	550	8.5	531	14	37.9286	5									-0.0804953			-0.204593
31	Rizhiya et al.,2020	48.19	18.09			incubation		medium	upland	6.1	13	1.38	1.31	230	IN+OF	6	biowaste	550	8.5	531	14	37.9286	5									-1.02733			-1.45141
31	Rizhiya et al.,2020	48.19	18.09			incubation		medium	upland	6.1	13	1.38	1.31		OF	0	biowaste	550	8.5	531	14	37.9286	5									0.469718			1.16418
31	Rizhiya et al.,2020	48.19	18.09			incubation		medium	upland	6.1	13	1.38	1.31	230	IN	0	biowaste	550	8.5	531	14	37.9286	5									1.30228			2.7767
31	Rizhiya et al.,2020	48.19	18.09			incubation		medium	upland	6.1	13	1.38	1.31	230	IN+OF	0	biowaste	550	8.5	531	14	37.9286	5									1.4146			2.80702
31	Rizhiya et al.,2020	48.19	18.09			incubation		medium	upland	6.1	13	1.38	1.31		OF	6	biowaste	550	8.5	531	14	37.9286	5									0.385193			0.720248
31	Rizhiya et al.,2020	48.19	18.09			incubation		medium	upland	6.1	13	1.38	1.31	230	IN	6	biowaste	550	8.5	531	14	37.9286	5									1.22178			2.57211
31	Rizhiya et al.,2020	48.19	18.09			incubation		medium	upland	6.1	13	1.38	1.31	230	IN+OF	6	biowaste	550	8.5	531	14	37.9286	5									0.387274			1.35561
32	Sun et al.,2020	34.57	119.45	930	13.7	Field	0.328767	fine	upland	8.5	11.5	0.9		0	None	20	herbaceous	450	9.4	467	5.6	83.3929	3	0.0197796	0.209157			0.245122				0.208733			0.19671		0.229574			0.320389
32	Sun et al.,2020	34.57	119.45	930	13.7	Field	0.328767	fine	upland	8.5	11.5	0.9		0	None	40	herbaceous	450	9.4	467	5.6	83.3929	3	0.0186268	0.27061			0.352221				0.26983			0.265703		0.291706			0.40697
32	Sun et al.,2020	34.57	119.45	930	13.7	Field	0.328767	fine	upland	8.5	11.5	0.9		300	IN	20	herbaceous	450	9.4	467	5.6	83.3929	3	0.0174322	0.25185			0.276632				0.0733433			0.0901511		0.296266			0.300081
32	Sun et al.,2020	34.57	119.45	930	13.7	Field	0.328767	fine	upland	8.5	11.5	0.9		300	IN	40	herbaceous	450	9.4	467	5.6	83.3929	3	0.0185836	0.351648			0.284931				0.0194295			0.333773		0.304777			0.378978
32	Sun et al.,2020	34.57	119.45	930	13.7	Field	0.328767	fine	upland	8.5	11.5	0.9		300	IN	0	herbaceous	450	9.4	467	5.6	83.3929	3	0.00234742	-0.105168			0.0110498				0.246908			0.834798		0.338774			-0.00388099
32	Sun et al.,2020	34.57	119.45	930	13.7	Field	0.328767	fine	upland	8.5	11.5	0.9		300	IN	20	herbaceous	450	9.4	467	5.6	83.3929	3	0.0197796	0.146682			0.287682				0.320251			0.924949		0.63504			0.2962
32	Sun et al.,2020	34.57	119.45	930	13.7	Field	0.328767	fine	upland	8.5	11.5	0.9		300	IN	40	herbaceous	450	9.4	467	5.6	83.3929	3	0.020931	0.24648			0.295981				0.266337			1.16857		0.64355			0.375097
32	Sun et al.,2020	34.57	119.45	930	13.7	Field	0.328767	fine	upland	8.5	11.5	0.9		300	IN	20	herbaceous	450	9.4	467	5.6	83.3929	3	0	-0.0624749			0.0425596				0.111518			0.728239		0.405465			-0.024189
32	Sun et al.,2020	34.57	119.45	930	13.7	Field	0.328767	fine	upland	8.5	11.5	0.9		300	IN	40	herbaceous	450	9.4	467	5.6	83.3929	3	0.00230415	-0.0241299			-0.0562397				-0.00349244			0.902868		0.351844			-0.0318735
33	Zhou et al.,2016	31.58	118.48	1050.2	15.7	Field	0.493151	medium	upland	6.7	15.3	1.32	1.15	0	None	20	herbaceous	550	9.4	467	5.6	83.3929	3												0.0555699
33	Zhou et al.,2016	31.58	118.48	1050.2	15.7	Field	0.493151	medium	upland	6.7	15.3	1.32	1.15	250	IN	20	herbaceous	550	9.4	467	5.6	83.3929	3												-0.171392
33	Zhou et al.,2016	31.58	118.48	1050.2	15.7	Field	0.493151	medium	upland	6.7	15.3	1.32	1.15	250	IN	40	herbaceous	550	9.4	467	5.6	83.3929	3												-0.2204
33	Zhou et al.,2016	31.58	118.48	1050.2	15.7	Field	0.493151	medium	upland	6.7	15.3	1.32	1.15	250	IN	0	herbaceous	550	9.4	467	5.6	83.3929	3												2.05412
33	Zhou et al.,2016	31.58	118.48	1050.2	15.7	Field	0.493151	medium	upland	6.7	15.3	1.32	1.15	250	IN	20	herbaceous	550	9.4	467	5.6	83.3929	3												1.88273
33	Zhou et al.,2016	31.58	118.48	1050.2	15.7	Field	0.493151	medium	upland	6.7	15.3	1.32	1.15	250	IN	40	herbaceous	550	9.4	467	5.6	83.3929	3												1.83372
33	Zhou et al.,2016	31.58	118.48	1050.2	15.7	Field	0.575342	medium	upland	6.7	15.3	1.32	1.15	0	None	20	herbaceous	550	9.4	467	5.6	83.3929	3												0.292136
33	Zhou et al.,2016	31.58	118.48	1050.2	15.7	Field	0.575342	medium	upland	6.7	15.3	1.32	1.15	250	IN	20	herbaceous	550	9.4	467	5.6	83.3929	3												-0.408949
33	Zhou et al.,2016	31.58	118.48	1050.2	15.7	Field	0.575342	medium	upland	6.7	15.3	1.32	1.15	250	IN	40	herbaceous	550	9.4	467	5.6	83.3929	3												-0.723158
33	Zhou et al.,2016	31.58	118.48	1050.2	15.7	Field	0.575342	medium	upland	6.7	15.3	1.32	1.15	250	IN	0	herbaceous	550	9.4	467	5.6	83.3929	3												2.32902
33	Zhou et al.,2016	31.58	118.48	1050.2	15.7	Field	0.575342	medium	upland	6.7	15.3	1.32	1.15	250	IN	20	herbaceous	550	9.4	467	5.6	83.3929	3												1.92007
33	Zhou et al.,2016	31.58	118.48	1050.2	15.7	Field	0.575342	medium	upland	6.7	15.3	1.32	1.15	250	IN	40	herbaceous	550	9.4	467	5.6	83.3929	3												1.60586
33	Zhou et al.,2016	31.58	118.48	1050.2	15.7	Field	1	medium	upland	6.7	15.3	1.32	1.15	0	None	20	herbaceous	550	9.4	467	5.6	83.3929	3												0.244197
33	Zhou et al.,2016	31.58	118.48	1050.2	15.7	Field	1	medium	upland	6.7	15.3	1.32	1.15	250	IN	20	herbaceous	550	9.4	467	5.6	83.3929	3												-0.382427
33	Zhou et al.,2016	31.58	118.48	1050.2	15.7	Field	1	medium	upland	6.7	15.3	1.32	1.15	250	IN	40	herbaceous	550	9.4	467	5.6	83.3929	3												-0.615715
33	Zhou et al.,2016	31.58	118.48	1050.2	15.7	Field	1	medium	upland	6.7	15.3	1.32	1.15	250	IN	0	herbaceous	550	9.4	467	5.6	83.3929	3												2.30683
33	Zhou et al.,2016	31.58	118.48	1050.2	15.7	Field	1	medium	upland	6.7	15.3	1.32	1.15	250	IN	20	herbaceous	550	9.4	467	5.6	83.3929	3												1.9244
33	Zhou et al.,2016	31.58	118.48	1050.2	15.7	Field	1	medium	upland	6.7	15.3	1.32	1.15	250	IN	40	herbaceous	550	9.4	467	5.6	83.3929	3												1.69112
34	Rogovska et al.,2011	36.12	-81.4			pot		fine	upland	6.4				0	None	#REF!	wood	500	7.6	715	7.2	99.3056	6									0.176711
34	Rogovska et al.,2011	36.12	-81.4			pot		fine	upland	6.4				0	None	#REF!	wood	500	7.6	715	7.2	99.3056	6									0.319883
34	Rogovska et al.,2011	36.12	-81.4			pot		fine	upland	6.4				0	None	#REF!	wood	500	7.6	715	7.2	99.3056	6									0.4604
34	Rogovska et al.,2011	36.12	-81.4			pot		fine	upland	6.4					OF	#REF!	wood	500	7.6	715	7.2	99.3056	6									0.0512335
34	Rogovska et al.,2011	36.12	-81.4			pot		fine	upland	6.4					OF	#REF!	wood	500	7.6	715	7.2	99.3056	6									0.0968299
34	Rogovska et al.,2011	36.12	-81.4			pot		fine	upland	6.4					OF	#REF!	wood	500	7.6	715	7.2	99.3056	6									0.197642
34	Rogovska et al.,2011	36.12	-81.4			pot		fine	upland	6.4					OF	0	wood	500	7.6	715	7.2	99.3056	6									0.310558
34	Rogovska et al.,2011	36.12	-81.4			pot		fine	upland	6.4					OF	#REF!	wood	500	7.6	715	7.2	99.3056	6									0.361792
34	Rogovska et al.,2011	36.12	-81.4			pot		fine	upland	6.4					OF	#REF!	wood	500	7.6	715	7.2	99.3056	6									0.407388
34	Rogovska et al.,2011	36.12	-81.4			pot		fine	upland	6.4					OF	#REF!	wood	500	7.6	715	7.2	99.3056	6									0.5082
34	Rogovska et al.,2011	36.12	-81.4			pot		fine	upland	6.4					OF	#REF!	wood	500	7.6	715	7.2	99.3056	6									0.18508
34	Rogovska et al.,2011	36.12	-81.4			pot		fine	upland	6.4					OF	#REF!	wood	500	7.6	715	7.2	99.3056	6									0.0875055
34	Rogovska et al.,2011	36.12	-81.4			pot		fine	upland	6.4					OF	#REF!	wood	500	7.6	715	7.2	99.3056	6									0.0478003
35	Xiao et al.,2019	32.733	119.717			incubation			upland	4.38	12.22	1.55		200	IN	0	herbaceous	500	10.2	434.8	8.7	49.98	3			0.00114943	0.0524869		0.48091	0.0864013	0.0255215	-0.139514	-0.580473		1.56723	1.32722
35	Xiao et al.,2019	32.733	119.717			incubation			upland	4.38	12.22	1.55		400	IN	0	herbaceous	500	10.2	434.8	8.7	49.98	3			0.0310149	0.011468		0.760486	0.0840625		-0.206503	-0.930146		2.54018	2.27352
35	Xiao et al.,2019	32.733	119.717			incubation			upland	4.38	12.22	1.55		200	IN	30	herbaceous	500	10.2	434.8	8.7	49.98	3			0.0232138	0.118245		0.331889	-0.236952	0.0541733	0.00959876	-1.36098		1.88183	1.69373
35	Xiao et al.,2019	32.733	119.717			incubation			upland	4.38	12.22	1.55		400	IN	30	herbaceous	500	10.2	434.8	8.7	49.98	3			0.231815	0.0733497		0.535658	0.475478		-0.077526	-2.05412		2.61771	2.4232
35	Xiao et al.,2019	32.733	119.717			incubation			upland	4.38	12.22	1.55		200	IN	30	herbaceous	500	10.2	434.8	8.7	49.98	3			0.278974	0.462529		-0.0267006	-1.04259		-0.108609	-2.38876		1.237	0.968927
35	Xiao et al.,2019	32.733	119.717			incubation			upland	4.38	12.22	1.55		400	IN	30	herbaceous	500	10.2	434.8	8.7	49.98	3			0.487575	0.417633		0.177068	-0.330165		-0.195734	-3.08191		1.97289	1.6984
35	Xiao et al.,2019	32.733	119.717			incubation			upland	4.38	12.22	1.55		0	None	30	herbaceous	500	10.2	434.8	8.7	49.98	3			0.25576	0.344283		-0.35859	-0.805642		-0.118208	-1.02779		-0.644826	-0.724802
35	Xiao et al.,2019	32.733	119.717			incubation			upland	4.38	12.22	1.55		200	IN	0	herbaceous	500	10.2	434.8	8.7	49.98	3			0.0780328	-0.0233153		0.484873	-0.16397	0.0616364	-0.092706	-1.69418		1.64512	1.60746
35	Xiao et al.,2019	32.733	119.717			incubation			upland	4.38	12.22	1.55		400	IN	0	herbaceous	500	10.2	434.8	8.7	49.98	3			0.507575	-0.0949072		1.1614	0.361599	-0.4037	-0.28714	-3.7184		2.08871	2.04975
35	Xiao et al.,2019	32.733	119.717			incubation			upland	4.38	12.22	1.55		200	IN	30	herbaceous	500	10.2	434.8	8.7	49.98	3			0.198452	-0.147914		0.196996	0.478331	0.118621	-0.0193949	-0.142274		2.33698	2.33291
35	Xiao et al.,2019	32.733	119.717			incubation			upland	4.38	12.22	1.55		400	IN	30	herbaceous	500	10.2	434.8	8.7	49.98	3			0.0480602	0.0214116		0.0464002	0.753028	0.579453	-0.158165	-0.412512		3.06899	3.06468
35	Xiao et al.,2019	32.733	119.717			incubation			upland	4.38	12.22	1.55		200	IN	30	herbaceous	500	10.2	434.8	8.7	49.98	3			0.720052	0.225199		-0.352141	0.843393	-0.20447	-0.0955349	-3.41329		1.25621	1.21751
35	Xiao et al.,2019	32.733	119.717			incubation			upland	4.38	12.22	1.55		400	IN	30	herbaceous	500	10.2	434.8	8.7	49.98	3			0.569659	0.394525		-0.502736	1.11809	0.256362	-0.234305	-3.68353		1.98822	1.94929
35	Xiao et al.,2019	32.733	119.717			incubation			upland	4.38	12.22	1.55		0	None	30	herbaceous	500	10.2	434.8	8.7	49.98	3			0.521599	0.373113		-0.549137	0.365063	-0.323091	-0.07614	-3.27102		-1.08077	-1.11539
35	Xiao et al.,2019	32.733	119.717			incubation			upland	4.38	12.22	1.55		200	IN	0	herbaceous	500	10.2	434.8	8.7	49.98	3			0.127564	-0.13621		0.247389	0.825608	-0.00121453	-0.173653			0.974381
35	Xiao et al.,2019	32.733	119.717			incubation			upland	4.38	12.22	1.55		400	IN	0	herbaceous	500	10.2	434.8	8.7	49.98	3			0.261364	-0.34103		1.13488	2.5315	0.362139	-0.256881			1.66817
35	Xiao et al.,2019	32.733	119.717			incubation			upland	4.38	12.22	1.55		200	IN	30	herbaceous	500	10.2	434.8	8.7	49.98	3			0.204195	-0.205764		-0.226896	3.47958	-0.431009	-0.0743409			1.16527
35	Xiao et al.,2019	32.733	119.717			incubation			upland	4.38	12.22	1.55		400	IN	30	herbaceous	500	10.2	434.8	8.7	49.98	3			0.355368	-0.391037		0.839297	4.57556	-1.07894	-0.0101798			1.83217
35	Xiao et al.,2019	32.733	119.717			incubation			upland	4.38	12.22	1.55		200	IN	30	herbaceous	500	10.2	434.8	8.7	49.98	3			0.906312	0.147507		-0.705029	2.03354	-0.239811	-0.140796			0.553806
35	Xiao et al.,2019	32.733	119.717			incubation			upland	4.38	12.22	1.55		400	IN	30	herbaceous	500	10.2	434.8	8.7	49.98	3			1.05749	-0.0377663		0.361164	3.12952	-0.88774	-0.0766349			1.2207
35	Xiao et al.,2019	32.733	119.717			incubation			upland	4.38	12.22	1.55		0	None	30	herbaceous	500	10.2	434.8	8.7	49.98	3			0.702117	0.353271		-0.478133	-1.44603	0.191197	-0.0664551			-0.611469
36	Hangs et al.,2016	52.2	-106.7			incubation		medium	upland	7.2	12	2		0	None	20	wood	475	9.7	813	7	116.14	5									-0.0420718		0.644304	-0.119347
36	Hangs et al.,2016	52.2	-106.7			incubation		medium	upland	7.2	12	2		100	IN	20	wood	475	9.7	813	7	116.14	5									0.0482583		0.625074	-1.63787	-2.33727
36	Hangs et al.,2016	52.2	-106.7			incubation		medium	upland	7.2	12	2		100	IN	0	wood	475	9.7	813	7	116.14	5									-0.29325		-0.876179	2.62648
36	Hangs et al.,2016	52.2	-106.7			incubation		medium	upland	7.2	12	2		100	IN	20	wood	475	9.7	813	7	116.14	5									-0.244992		-0.251105	0.988613
36	Hangs et al.,2016	52.2	-106.7			incubation		medium	upland	7.2	12	2		100	IN	20	wood	475	9.7	813	7	116.14	5									-0.20292		-0.895409	1.10796
36	Hangs et al.,2016	50.446	-104.619			incubation		medium	upland	7.1	38	3		0	None	20	wood	475	9.7	813	7	116.14	5									-0.288576		0.862053	-1.0003
36	Hangs et al.,2016	50.446	-104.619			incubation		medium	upland	7.1	38	3		100	IN	20	wood	475	9.7	813	7	116.14	5									-0.183197		0.688841	-0.900315	-1.92112
36	Hangs et al.,2016	50.446	-104.619			incubation		medium	upland	7.1	38	3		100	IN	0	wood	475	9.7	813	7	116.14	5									-0.256896		-0.861149	1.68425	-4.19631
36	Hangs et al.,2016	50.446	-104.619			incubation		medium	upland	7.1	38	3		100	IN	20	wood	475	9.7	813	7	116.14	5									-0.440093		-0.172308	0.783936
36	Hangs et al.,2016	50.446	-104.619			incubation		medium	upland	7.1	38	3		100	IN	20	wood	475	9.7	813	7	116.14	5									-0.151517		-1.03436	1.78424
37	Kang et al.,2018	34.939	127.565	1400	12.5	Field	0.252	medium	upland	5.18	10.32	1.61		0	None	10	herbaceous	400	8.02	715	13	55	6												0.667241
37	Kang et al.,2018	34.939	127.565	1400	12.5	Field	0.252	medium	upland	5.18	10.32	1.61		320	IN	0	herbaceous	400	8.02	715	13	55	6												1.59844
37	Kang et al.,2018	34.939	127.565	1400	12.5	Field	0.252	medium	upland	5.18	10.32	1.61		320	IN	10	herbaceous	400	8.02	715	13	55	6												1.34672
38	Li et al.,2017	31.59	118.51	1107	15.3	Field	2	fine	upland	5.5	15.6	1.9	1.2	0	None	20	herbaceous	400	9.4	467	5.9	79.15	3	0.0215483	0.0400053			0.0133335							0.803768		0.134783		-0.0327898
38	Li et al.,2017	31.59	118.51	1107	15.3	Field	2	fine	upland	5.5	15.6	1.9	1.2	0	None	40	herbaceous	400	9.4	467	5.9	79.15	3	0.0445379	0.151231			0.0199342							-0.179065		0.0742852		-0.0495969
38	Li et al.,2017	31.59	118.51	1107	15.3	Field	2	fine	upland	5.5	15.6	1.9	1.2	1223	IN	0	herbaceous	400	9.4	467	5.9	79.15	3	-0.144625	-0.146246			0.0712275							-0.135313		0.0497677		0.0549158
38	Li et al.,2017	31.59	118.51	1107	15.3	Field	2	fine	upland	5.5	15.6	1.9	1.2	1644	IN	0	herbaceous	400	9.4	467	5.9	79.15	3	-0.205965	-0.0777777			0.0898039							-0.423362		0.10653		0.0472529
38	Li et al.,2017	31.59	118.51	1107	15.3	Field	2	fine	upland	5.5	15.6	1.9	1.2	1223	IN	20	herbaceous	400	9.4	467	5.9	79.15	3	-0.198692	0.208064			0.131852							-0.240549		0.233019		0.0395308
38	Li et al.,2017	31.59	118.51	1107	15.3	Field	2	fine	upland	5.5	15.6	1.9	1.2	1223	IN	40	herbaceous	400	9.4	467	5.9	79.15	3	-0.189077	0.246009			0.183439				0.365238			0.324496		0.401697		0.0395308
38	Li et al.,2017	31.59	118.51	1107	15.3	Field	2	fine	upland	5.5	15.6	1.9	1.2	1644	IN	20	herbaceous	400	9.4	467	5.9	79.15	3	-0.223144	0.115513			0.108041				0.372673			0.90287		0.216113		0.0472529
38	Li et al.,2017	31.59	118.51	1107	15.3	Field	2	fine	upland	5.5	15.6	1.9	1.2	1644	IN	40	herbaceous	400	9.4	467	5.9	79.15	3	-0.210843	0.127561			0.243078				0.287681			0.448951		0.311081		0.0395308
39	Fuertes et al.,2019	43.17	-2.52			incubation		medium	upland	6	34.2	4.3		0	None	40	wood	500	7.6	800.3	5.6	142.91	6	0.0353283					-0.421993	0.0173917					-0.810933						-0.345394	-0.0652571	-0.101974	-0.13878
39	Fuertes et al.,2019	43.17	-2.52			incubation		medium	upland	6	34.2	4.3		180	IN	0	wood	500	7.6	800.3	5.6	142.91	6	-0.138913					0.926079	0.666479					2.19103						-2.6403	0.244351	-0.413125	-1.49474
39	Fuertes et al.,2019	43.17	-2.52			incubation		medium	upland	6	34.2	4.3		180	IN	40	wood	500	7.6	800.3	5.6	142.91	6	-0.129671					0.771928	0.654394					1.29928						-1.74019	0.692151	-0.0891348	-1.23484
39	Fuertes et al.,2019	43.17	-2.52			incubation		medium	upland	6	34.2	4.3		0	None	40	wood	500	7.6	800.3	5.6	142.91	6	0.0662633					-0.203604	-0.664748					0.595224						0.410744	0.195646	0.252139	0.173295
39	Fuertes et al.,2019	43.17	-2.52			incubation		medium	upland	6	34.2	4.3		180	IN	0	wood	500	7.6	800.3	5.6	142.91	6	-0.10643					1.39936	1.56827					2.32381						0.413161	0.408655	0.123125	-0.0729231
39	Fuertes et al.,2019	43.17	-2.52			incubation		medium	upland	6	34.2	4.3		180	IN	40	wood	500	7.6	800.3	5.6	142.91	6	-0.0709697					0.744437	1.02165					2.37615						0.541427	0.642015	0.290769	0.241526
40	Fungo et al.,2019	0.09	34.57	1724.41	36	Field	2.87	fine	upland	6				75	OF	0	wood	550	6.3	868		32.15	3												0.563553
40	Fungo et al.,2019	0.09	34.57	1724.41	36	Field	2.87	fine	upland	6				150	OF	0	wood	550	6.3	868		32.15	3												0.631306
40	Fungo et al.,2019	0.09	34.57	1724.41	36	Field	2.87	fine	upland	6				195	IN+OF	0	wood	550	6.3	868		32.15	3												1.07533
40	Fungo et al.,2019	0.09	34.57	1724.41	36	Field	2.87	fine	upland	6				270	IN+OF	0	wood	550	6.3	868		32.15	3												1.08822
40	Fungo et al.,2019	0.09	34.57	1724.41	36	Field	2.87	fine	upland	6				120	IN	0	wood	550	6.3	868		32.15	3												0.857353
40	Fungo et al.,2019	0.09	34.57	1724.41	36	Field	2.87	fine	upland	6				0	None	2.5	wood	550	6.3	868		32.15	3												-0.621231
40	Fungo et al.,2019	0.09	34.57	1724.41	36	Field	2.87	fine	upland	6				75	OF	2.5	wood	550	6.3	868		32.15	3												-0.378638
40	Fungo et al.,2019	0.09	34.57	1724.41	36	Field	2.87	fine	upland	6				150	OF	2.5	wood	550	6.3	868		32.15	3												-0.0597108
40	Fungo et al.,2019	0.09	34.57	1724.41	36	Field	2.87	fine	upland	6				120	IN	2.5	wood	550	6.3	868		32.15	3												0.820669
40	Fungo et al.,2019	0.09	34.57	1724.41	36	Field	2.87	fine	upland	6				195	IN+OF	2.5	wood	550	6.3	868		32.15	3												1.0287
40	Fungo et al.,2019	0.09	34.57	1724.41	36	Field	2.87	fine	upland	6				270	IN+OF	2.5	wood	550	6.3	868		32.15	3												1.19343
41	Lu et al.,2018	30.26	120.24			pot			upland	6.03	6.09	0.8		133	IN	0							4	-0.00938974	0.106483	0.0403606		0.143101	0.494603	0.2455		0.365238	-0.742681		0.803768	-0.646854	0.229357	-0.876211
41	Lu et al.,2018	30.26	120.24			pot			upland	6.03	6.09	0.8		0	None	40	herbaceous	600	9.84	709	4.1	172.927	4	0.0396999	1.1891	0.0244113		0.0908502	0.343563	0.203828		0.372673	-1.04084		-0.179065	-1.00429	0.045038	-1.04933
41	Lu et al.,2018	30.26	120.24			pot			upland	6.03	6.09	0.8		133	IN	40	herbaceous	600	9.84	709	4.1	172.927	4	0.04567	1.23961	0.0521578		0.296732	0.373016	0.7189		0.287681	-1.93115		-0.135313	-1.80297	0.387585	-2.19055
41	Lu et al.,2018	30.26	120.24			pot			upland	6.03	6.09	0.8		133	IN	40	herbaceous		8.98	692.8	3.6	192.444	4	0.053083	1.24886	0.112828		0.104801	0.243622	0.224881		0.295712	-1.17587		-0.423362	-1.14578	0.14646	-1.29224
41	Lu et al.,2018	30.26	120.24			pot			upland	6.03	6.09	0.8		133	IN	40	herbaceous		8.98	692.8	3.6	192.444	4	0.0411958	1.17779	0.112828		0.283126	0.375651	0.573188			-2.70434		-0.240549	-2.4477	0.405552	-2.85325
42	Xu et al.,2018	31.58	118.48	1061.2	16.5	Field	1	medium	upland	5.91	16.23	0.86	1.41	250	IN	0	herbaceous	400	9.4	467	5.6	83.3929	3										1.64964
42	Xu et al.,2018	31.58	118.48	1061.2	16.5	Field	1	medium	upland	5.91	16.23	0.86	1.41	0	None	20	herbaceous	400	9.4	467	5.6	83.3929	3										0.53364
42	Xu et al.,2018	31.58	118.48	1061.2	16.5	Field	1	medium	upland	5.91	16.23	0.86	1.41	250	IN	20	herbaceous	400	9.4	467	5.6	83.3929	3										1.58346
42	Xu et al.,2018	31.58	118.48	1061.2	16.5	Field	1	medium	upland	5.91	16.23	0.86	1.41	251	IN	40	herbaceous	400	9.4	467	5.6	83.3929	3										1.33365
42	Xu et al.,2018	31.58	118.48	1061.2	16.5	Field	2	medium	upland	5.91	16.23	0.86	1.41	250	IN	0	herbaceous	400	9.4	467	5.6	83.3929	3										2.00006
42	Xu et al.,2018	31.58	118.48	1061.2	16.5	Field	2	medium	upland	5.91	16.23	0.86	1.41	0	None	20	herbaceous	400	9.4	467	5.6	83.3929	3										0.182322
42	Xu et al.,2018	31.58	118.48	1061.2	16.5	Field	2	medium	upland	5.91	16.23	0.86	1.41	250	IN	20	herbaceous	400	9.4	467	5.6	83.3929	3										1.71142
42	Xu et al.,2018	31.58	118.48	1061.2	16.5	Field	2	medium	upland	5.91	16.23	0.86	1.41	251	IN	40	herbaceous	400	9.4	467	5.6	83.3929	3										1.37038
42	Xu et al.,2018	31.58	118.48	1061.2	16.5	Field	1	medium	upland	5.91	16.23	0.86	1.41	250	IN	0	herbaceous	400	9.4	467	5.6	83.3929	3										-0.146603
42	Xu et al.,2018	31.58	118.48	1061.2	16.5	Field	1	medium	upland	5.91	16.23	0.86	1.41	0	None	20	herbaceous	400	9.4	467	5.6	83.3929	3										0.50627
42	Xu et al.,2018	31.58	118.48	1061.2	16.5	Field	1	medium	upland	5.91	16.23	0.86	1.41	250	IN	20	herbaceous	400	9.4	467	5.6	83.3929	3										-0.146603
42	Xu et al.,2018	31.58	118.48	1061.2	16.5	Field	1	medium	upland	5.91	16.23	0.86	1.41	251	IN	40	herbaceous	400	9.4	467	5.6	83.3929	3										-0.0706176
42	Xu et al.,2018	31.58	118.48	1061.2	16.5	Field	2	medium	upland	5.91	16.23	0.86	1.41	250	IN	0	herbaceous	400	9.4	467	5.6	83.3929	3										0.470004
42	Xu et al.,2018	31.58	118.48	1061.2	16.5	Field	2	medium	upland	5.91	16.23	0.86	1.41	0	None	20	herbaceous	400	9.4	467	5.6	83.3929	3										0.336472
42	Xu et al.,2018	31.58	118.48	1061.2	16.5	Field	2	medium	upland	5.91	16.23	0.86	1.41	250	IN	20	herbaceous	400	9.4	467	5.6	83.3929	3										-0.192372
42	Xu et al.,2018	31.58	118.48	1061.2	16.5	Field	2	medium	upland	5.91	16.23	0.86	1.41	251	IN	40	herbaceous	400	9.4	467	5.6	83.3929	3										0.371564
43	Horak et al.,2017	48.19	18.09	539	9.8	Field	0.657534	medium	upland	5.71	9.13			0		10	biowaste	550	8.8	531	14	37.9	3	0.071656					0.00156372	-0.0860746					-0.420347				-0.0291992
43	Horak et al.,2017	48.19	18.09	539	9.8	Field	0.657534	medium	upland	5.71	9.13			0		20	biowaste	550	8.8	531	14	37.9	3	0.113329					0.0782354	-0.0917084					-0.395433				-0.0824437
43	Horak et al.,2017	48.19	18.09	539	9.8	Field	0.657534	medium	upland	5.71	9.13			40	IN	0	biowaste	550	8.8	531	14	37.9	3	-0.0172915					0.292366	0.0768656					-0.0661588				0.0283707
43	Horak et al.,2017	48.19	18.09	539	9.8	Field	0.657534	medium	upland	5.71	9.13			80	IN	0	biowaste	550	8.8	531	14	37.9	3	-0.0329168					0.352441	0.313757					0.197586				-0.0366341
43	Horak et al.,2017	48.19	18.09	539	9.8	Field	0.657534	medium	upland	5.71	9.13			40	IN	10	biowaste	550	8.8	531	14	37.9	3	0.109922					0.20195	0.0329561					-0.343161				-0.014493
43	Horak et al.,2017	48.19	18.09	539	9.8	Field	0.657534	medium	upland	5.71	9.13			40	IN	20	biowaste	550	8.8	531	14	37.9	3	0.111627					0.157499	-0.100219					-0.347422				-0.130453
43	Horak et al.,2017	48.19	18.09	539	9.8	Field	0.657534	medium	upland	5.71	9.13			80	IN	10	biowaste	550	8.8	531	14	37.9	3	0.076961					0.387039	-0.0666025					-0.0916479				0.0213531
43	Horak et al.,2017	48.19	18.09	539	9.8	Field	0.657534	medium	upland	5.71	9.13			80	IN	20	biowaste	550	8.8	531	14	37.9	3	0.128519					0.24818	-0.0208341					-0.179224				-0.114192
43	Horak et al.,2017	48.19	18.09	539	9.8	Field	0.657534	medium	upland	5.71	9.13			40	IN	10	biowaste	550	8.8	531	14	37.9	3	0.127213					-0.0904156	-0.0439095					-0.277002				-0.0428637
43	Horak et al.,2017	48.19	18.09	539	9.8	Field	0.657534	medium	upland	5.71	9.13			40	IN	20	biowaste	550	8.8	531	14	37.9	3	0.128918					-0.134867	-0.177085					-0.281263				-0.158824
43	Horak et al.,2017	48.19	18.09	539	9.8	Field	0.657534	medium	upland	5.71	9.13			80	IN	10	biowaste	550	8.8	531	14	37.9	3	0.109878					0.034598	-0.380359					-0.289234				0.0579873
43	Horak et al.,2017	48.19	18.09	539	9.8	Field	0.657534	medium	upland	5.71	9.13			80	IN	20	biowaste	550	8.8	531	14	37.9	3	0.161436					-0.104261	-0.334591					-0.37681				-0.0775582
44	Zhao et al.,2015	27.02	118.01	1300	17	incubation		fine	upland	4.84	4.2	0.28		150	IN	0							3	-0.118574		-0.152145	-0.105981		2.1202	2.53373		-0.119909
44	Zhao et al.,2015	27.02	118.01	1300	17	incubation		fine	upland	4.84	4.2	0.28		0	None	10	wood	450	5.01	704.6	1.3	542	3	0.0125788		-0.286696	0.623006		-0.187883	0.255679		0.479562
44	Zhao et al.,2015	27.02	118.01	1300	17	incubation		fine	upland	4.84	4.2	0.28		0	None	10	wood	450	4.88	712.1	3.2	222.531	3	0.00630917		-0.178878	0.591298		-0.0298035	0.226288		0.577403
44	Zhao et al.,2015	27.02	118.01	1300	17	incubation		fine	upland	4.84	4.2	0.28		0	None	20	wood	450	5.01	704.6	1.3	542	3	0.0104933		-0.260413	0.720471		-0.302473	0.10102		0.648088
44	Zhao et al.,2015	27.02	118.01	1300	17	incubation		fine	upland	4.84	4.2	0.28		0	None	20	wood	450	4.88	712.1	3.2	222.531	3	0.00210748		-0.0755722	0.597977		-0.265632	0.196007		0.673969
44	Zhao et al.,2015	27.02	118.01	1300	17	incubation		fine	upland	4.84	4.2	0.28		150	IN	10	wood	450	5.01	704.6	1.3	542	3	-0.0904696		-0.160398	0.586907		2.59766	2.84048		0.261645
44	Zhao et al.,2015	27.02	118.01	1300	17	incubation		fine	upland	4.84	4.2	0.28		150	IN	10	wood	450	4.88	712.1	3.2	222.531	3	-0.0950992		-0.102603	0.680262		2.60021	2.80824		0.203557
44	Zhao et al.,2015	27.02	118.01	1300	17	incubation		fine	upland	4.84	4.2	0.28		150	IN	20	wood	450	5.01	704.6	1.3	542	3	-0.0950992		-0.0688932	0.586389		2.57519	2.85916		0.379937
44	Zhao et al.,2015	27.02	118.01	1300	17	incubation		fine	upland	4.84	4.2	0.28		150	IN	20	wood	450	4.88	712.1	3.2	222.531	3	-0.0904696		-0.188274	0.676482		2.59023	2.87261		0.309621
44	Zhao et al.,2015	27.02	118.01	1300	17	incubation		fine	upland	4.84	4.2	0.28		150	IN	10	wood	450	5.01	704.6	1.3	542	3	0.0281049		-0.00825287	0.692888		0.477464	0.306754		0.381554
44	Zhao et al.,2015	27.02	118.01	1300	17	incubation		fine	upland	4.84	4.2	0.28		150	IN	10	wood	450	4.88	712.1	3.2	222.531	3	0.0234753		0.0495422	0.786243		0.480011	0.274512		0.323467
44	Zhao et al.,2015	27.02	118.01	1300	17	incubation		fine	upland	4.84	4.2	0.28		150	IN	20	wood	450	5.01	704.6	1.3	542	3	0.0234753		0.0832517	0.69237		0.454988	0.325431		0.499846
44	Zhao et al.,2015	27.02	118.01	1300	17	incubation		fine	upland	4.84	4.2	0.28		150	IN	20	wood	450	4.88	712.1	3.2	222.531	3	0.0281049		-0.0361289	0.782464		0.470028	0.33888		0.42953
45	Ferndez et al., 2014	40.19	-3.29	437	14	incubation				8.8	10	1.2	1.15	75	IN	0	wood	600	10.06	597	4.1	145.61	3		0.0598291		-0.0975834					-0.0953086
45	Ferndez et al., 2014	40.19	-3.29	437	14	incubation				8.8	10	1.2	1.15	150	IN	0	wood	600	10.06	597	4.1	145.61	3		0.0410682		-0.184155					-0.134972
45	Ferndez et al., 2014	40.19	-3.29	437	14	incubation				8.8	10	1.2	1.15	225	IN	0	wood	600	10.06	597	4.1	145.61	3		0.0591641		-0.317325					-0.270986
45	Ferndez et al., 2014	40.19	-3.29	437	14	incubation				8.8	10	1.2	1.15	0	None	20	wood	600	10.06	597	4.1	145.61	3		0.52482		-0.0817303					-0.11212
45	Ferndez et al., 2014	40.19	-3.29	437	14	incubation				8.8	10	1.2	1.15	75	IN	20	wood	600	10.06	597	4.1	145.61	3		0.565089		-0.297076					-0.11086
45	Ferndez et al., 2014	40.19	-3.29	437	14	incubation				8.8	10	1.2	1.15	150	IN	20	wood	600	10.06	597	4.1	145.61	3		0.531236		-0.184353					-0.181647
45	Ferndez et al., 2014	40.19	-3.29	437	14	incubation				8.8	10	1.2	1.15	225	IN	20	wood	600	10.06	597	4.1	145.61	3		0.533326		-0.420459					-0.206857
45	Ferndez et al., 2014	40.19	-3.29	437	14	incubation				8.8	10	1.2	1.15	75	OF	0	wood	600	10.06	597	4.1	145.61	3		0.103316		0.0629014					0.772615
45	Ferndez et al., 2014	40.19	-3.29	437	14	incubation				8.8	10	1.2	1.15	150	OF	0	wood	600	10.06	597	4.1	145.61	3		0.174294		0.0697092					1.14895
45	Ferndez et al., 2014	40.19	-3.29	437	14	incubation				8.8	10	1.2	1.15	225	OF	0	wood	600	10.06	597	4.1	145.61	3		0.240502		0.212666					1.36162
45	Ferndez et al., 2014	40.19	-3.29	437	14	incubation				8.8	10	1.2	1.15	0	None	20	wood	600	10.06	597	4.1	145.61	3		0.520151		-0.367512					-0.0811808
45	Ferndez et al., 2014	40.19	-3.29	437	14	incubation				8.8	10	1.2	1.15	75	OF	20	wood	600	10.06	597	4.1	145.61	3		0.567468		-0.0847372					0.767057
45	Ferndez et al., 2014	40.19	-3.29	437	14	incubation				8.8	10	1.2	1.15	150	OF	20	wood	600	10.06	597	4.1	145.61	3		0.560604		-0.0204031					1.09492
45	Ferndez et al., 2014	40.19	-3.29	437	14	incubation				8.8	10	1.2	1.15	225	OF	20	wood	600	10.06	597	4.1	145.61	3		0.663926		0.231024					1.41884
46	Zhang et al.,2019	35	113.43	542.15	15.6	Field	0.33	medium	upland	5.82	13.55	0.71	1.4	165	IN	0	lignocellulosic	500	9.16	647		42.52	3						0.743106	0.612768					1.42139
46	Zhang et al.,2019	35	113.43	542.15	15.6	Field	0.33	medium	upland	5.82	13.55	0.71	1.4	0	None	22.5	lignocellulosic	500	9.16	647		42.52	3						0.088065	0.0791819					0.538997
46	Zhang et al.,2019	35	113.43	542.15	15.6	Field	0.33	medium	upland	5.82	13.55	0.71	1.4	165	IN	22.5	lignocellulosic	500	9.16	647		42.52	3						0.552289	0.819779					1.21534
46	Zhang et al.,2019	35	113.43	542.15	15.6	Field	0.33	fine	upland	6.64	18.87	1.42	1.13	165	IN	0	lignocellulosic	500	9.16	647		42.52	3						0.595927	1.26737					0.774054
46	Zhang et al.,2019	35	113.43	542.15	15.6	Field	0.33	fine	upland	6.64	18.87	1.42	1.13	0	None	22.5	lignocellulosic	500	9.16	647		42.52	3						0.0736611	0.19511					-0.225956
46	Zhang et al.,2019	35	113.43	542.15	15.6	Field	0.33	fine	upland	6.64	18.87	1.42	1.13	165	IN	22.5	lignocellulosic	500	9.16	647		42.52	3						0.572208	1.47326					0.467191
46	Zhang et al.,2019	35	113.43	542.15	15.6	Field	0.33	medium	upland	7.12	12.36	0.51	1.31	165	IN	0	lignocellulosic	500	9.16	647		42.52	3						0.371515	0.923112					1.22481
46	Zhang et al.,2019	35	113.43	542.15	15.6	Field	0.33	medium	upland	7.12	12.36	0.51	1.31	0	None	22.5	lignocellulosic	500	9.16	647		42.52	3						-0.0527935	-0.0216791					0.411296
46	Zhang et al.,2019	35	113.43	542.15	15.6	Field	0.33	medium	upland	7.12	12.36	0.51	1.31	165	IN	22.5	lignocellulosic	500	9.16	647		42.52	3						0.301283	1.19988					1.06894
46	Zhang et al.,2019	35	113.43	542.15	15.6	Field	0.33	coarse	upland	8.14	10.69	0.44	1.18	165	IN	0	lignocellulosic	500	9.16	647		42.52	3						0.538661	1.29626					1.33904
46	Zhang et al.,2019	35	113.43	542.15	15.6	Field	0.33	coarse	upland	8.14	10.69	0.44	1.18	0	None	22.5	lignocellulosic	500	9.16	647		42.52	3						0.0555474	0.296631					0.291521
46	Zhang et al.,2020	35	113.43	542.15	15.6	Field	0.33	coarse	upland	8.14	10.69	0.44	1.18	165	IN	22.5	lignocellulosic	500	9.16	647		42.52	3						0.440564	1.51219					1.13388
47	Zhang et al.,2019	30.14	119.42	1613.9	15.6	Field	1		upland	5.3	26.1	2.1	1.3	30	IN	0	herbaceous	450	9.8	425.3	5.2	81.7885	3	0.0165293	0.109845		-0.100269	0.313658	-0.825075	0.506818		0.41184
47	Zhang et al.,2019	30.14	119.42	1613.9	15.6	Field	1		upland	5.3	26.1	2.1	1.3	60	IN	0	herbaceous	450	9.8	425.3	5.2	81.7885	3	-0.0870114	0.0475409		-0.0238084	0.233615	-0.802539	0.257959		0.492785
47	Zhang et al.,2019	30.14	119.42	1613.9	15.6	Field	1		upland	5.3	26.1	2.1	1.3	0	None	20	herbaceous	450	9.8	425.3	5.2	81.7885	3	0.0953102	0.139599		-0.0392948	0.489548	-0.926959	0.628228		0.283119
47	Zhang et al.,2019	30.14	119.42	1613.9	15.6	Field	1		upland	5.3	26.1	2.1	1.3	0	None	40	herbaceous	450	9.8	425.3	5.2	81.7885	3	0.154151	0.247562		-0.145726	0.422857	-0.845219	0.877847		0.329887
47	Zhang et al.,2019	30.14	119.42	1613.9	15.6	Field	1		upland	5.3	26.1	2.1	1.3	30	IN	20	herbaceous	450	9.8	425.3	5.2	81.7885	3	0.182322	0.235797		-0.331225	0.233615	-0.892847	0.118418		0.503559
47	Zhang et al.,2019	30.14	119.42	1613.9	15.6	Field	1		upland	5.3	26.1	2.1	1.3	30	IN	40	herbaceous	450	9.8	425.3	5.2	81.7885	3	0.209721	0.460124		-0.283615	0.191055	-0.512075	-0.0896122		0.546536
47	Zhang et al.,2019	30.14	119.42	1613.9	15.6	Field	1		upland	5.3	26.1	2.1	1.3	60	IN	20	herbaceous	450	9.8	425.3	5.2	81.7885	3	0.154151	0.309905		-0.26292	0.387766	-0.385075	-0.549665		0.530516
47	Zhang et al.,2019	30.14	119.42	1613.9	15.6	Field	1		upland	5.3	26.1	2.1	1.3	60	IN	40	herbaceous	450	9.8	425.3	5.2	81.7885	3	0.262364	0.320834		-0.281894	0.456758	-0.86875	-0.237532		0.592706
47	Zhang et al.,2019	30.14	119.42	1613.9	15.6	Field	2		upland	5.3	26.1	2.1	1.3	30	IN	0	herbaceous	450	9.8	425.3	5.2	81.7885	3									0.328533
47	Zhang et al.,2019	30.14	119.42	1613.9	15.6	Field	2		upland	5.3	26.1	2.1	1.3	60	IN	0	herbaceous	450	9.8	425.3	5.2	81.7885	3									0.271166
47	Zhang et al.,2019	30.14	119.42	1613.9	15.6	Field	2		upland	5.3	26.1	2.1	1.3	0	None	20	herbaceous	450	9.8	425.3	5.2	81.7885	3									0.0432155
47	Zhang et al.,2019	30.14	119.42	1613.9	15.6	Field	2		upland	5.3	26.1	2.1	1.3	0	None	40	herbaceous	450	9.8	425.3	5.2	81.7885	3									0.0351995
47	Zhang et al.,2019	30.14	119.42	1613.9	15.6	Field	2		upland	5.3	26.1	2.1	1.3	30	IN	20	herbaceous	450	9.8	425.3	5.2	81.7885	3									0.372015
47	Zhang et al.,2019	30.14	119.42	1613.9	15.6	Field	2		upland	5.3	26.1	2.1	1.3	30	IN	40	herbaceous	450	9.8	425.3	5.2	81.7885	3									0.389932
47	Zhang et al.,2019	30.14	119.42	1613.9	15.6	Field	2		upland	5.3	26.1	2.1	1.3	60	IN	20	herbaceous	450	9.8	425.3	5.2	81.7885	3									0.291982
47	Zhang et al.,2019	30.14	119.42	1613.9	15.6	Field	2		upland	5.3	26.1	2.1	1.3	60	IN	40	herbaceous	450	9.8	425.3	5.2	81.7885	3									0.305042
47	Zhang et al.,2019	30.14	119.42	1613.9	15.6	Field	3		upland	5.3	26.1	2.1	1.3	30	IN	0	herbaceous	450	9.8	425.3	5.2	81.7885	3									0.476051
47	Zhang et al.,2019	30.14	119.42	1613.9	15.6	Field	3		upland	5.3	26.1	2.1	1.3	60	IN	0	herbaceous	450	9.8	425.3	5.2	81.7885	3									0.262598
47	Zhang et al.,2019	30.14	119.42	1613.9	15.6	Field	3		upland	5.3	26.1	2.1	1.3	0	None	20	herbaceous	450	9.8	425.3	5.2	81.7885	3									0.103639
47	Zhang et al.,2019	30.14	119.42	1613.9	15.6	Field	3		upland	5.3	26.1	2.1	1.3	0	None	40	herbaceous	450	9.8	425.3	5.2	81.7885	3									0.103639
47	Zhang et al.,2019	30.14	119.42	1613.9	15.6	Field	3		upland	5.3	26.1	2.1	1.3	30	IN	20	herbaceous	450	9.8	425.3	5.2	81.7885	3									0.476051
47	Zhang et al.,2019	30.14	119.42	1613.9	15.6	Field	3		upland	5.3	26.1	2.1	1.3	30	IN	40	herbaceous	450	9.8	425.3	5.2	81.7885	3									0.476051
47	Zhang et al.,2019	30.14	119.42	1613.9	15.6	Field	3		upland	5.3	26.1	2.1	1.3	60	IN	20	herbaceous	450	9.8	425.3	5.2	81.7885	3									0.241378
47	Zhang et al.,2019	30.14	119.42	1613.9	15.6	Field	3		upland	5.3	26.1	2.1	1.3	60	IN	40	herbaceous	450	9.8	425.3	5.2	81.7885	3									0.248501
48	Zhang et al.,2012	34.32	115.3	780	13.9	Field	0.33	medium	upland	8.38	9.87	0.94	1.46	0	None	20	herbaceous	450	10.4	467	5.9	79.1525	3	0.0109824	0.364898			0.216223	0.226216	-0.00491401		0.0283046			0.133531	0.267262	0.146386	0.119263	-0.107797
48	Zhang et al.,2012	34.32	115.3	780	13.9	Field	0.33	medium	upland	8.38	9.87	0.94	1.46	0	None	40	herbaceous	450	10.4	467	5.9	79.1525	3	0.02783	0.456147			0.27029	0.420733	-0.0198026		0.113286		1.52243	0.0909718	-0.031337	0.0706899	-0.0979804	-0.228633
48	Zhang et al.,2012	34.32	115.3	780	13.9	Field	0.33	medium	upland	8.38	9.87	0.94	1.46	300	IN	20	herbaceous	450	10.4	467	5.9	79.1525	3	0.0120049	0.223144			0.074108	-0.00743498	-0.0446503		0.0123765		-1.09861	-0.112673	-0.102345	0.16717	-0.268814	-0.100471
48	Zhang et al.,2012	34.32	115.3	780	13.9	Field	0.33	medium	upland	8.38	9.87	0.94	1.46	300	IN	40	herbaceous	450	10.4	467	5.9	79.1525	3	-0.00605695	0.352355			0.0651393	0.169899	-0.110712		-0.0246077		-1.26567	-0.541341	-0.536547	0.109562	-0.646627	-0.133531
48	Zhang et al.,2012	34.32	115.3	780	13.9	Field	0.33	medium	upland	8.38	9.87	0.94	1.46	300	IN	0	herbaceous	450	10.4	467	5.9	79.1525	3	0.015825	0.0622423			0.178483	0.0377403	0.115602		-0.10119		1.17865	1.7595	1.78321	0.0572469	1.72277	-0.00732604
48	Zhang et al.,2012	34.32	115.3	780	13.9	Field	0.33	medium	upland	8.38	9.87	0.94	1.46	300	IN	20	herbaceous	450	10.4	467	5.9	79.1525	3	0.02783	0.285386			0.252591	0.0303053	0.0709517		-0.0888131		0.0800427	1.64683	1.68087	0.224417	1.45395	-0.107797
48	Zhang et al.,2012	34.32	115.3	780	13.9	Field	0.33	medium	upland	8.38	9.87	0.94	1.46	300	IN	40	herbaceous	450	10.4	467	5.9	79.1525	3	0.00976809	0.414598			0.243622	0.207639	0.00488999		-0.125797		-0.0870114	1.21816	1.24667	0.166809	1.07614	-0.140857
49	Zhang et al.,2016	31.24	119.41	1177	15.7	Field	0.33	medium	Paddy	6.5	24	1.8	1.01	0	None	10	herbaceous	450	10.4	467	5.9	79.1525	3	0.0288993	0.0972425			0.174803					0.499904		-0.3234	0.426255	0.110001	0.316254	-0.030153
49	Zhang et al.,2016	31.24	119.41	1177	15.7	Field	0.33	medium	Paddy	6.5	24	1.8	1.01	0	None	40	herbaceous	450	10.4	467	5.9	79.1525	3	0.0685813	0.451211			0.331645					0.516242		-0.236389	0.445729	0.13062	0.315109	-0.126484
49	Zhang et al.,2016	31.24	119.41	1177	15.7	Field	0.33	medium	Paddy	6.5	24	1.8	1.01	300	IN	10	herbaceous	450	10.4	467	5.9	79.1525	3	0.0331356	0.155381			0.0563529					-0.0307717		-0.514181	-0.133654	0.0842603	-0.217915	-0.0307717
49	Zhang et al.,2016	31.24	119.41	1177	15.7	Field	0.33	medium	Paddy	6.5	24	1.8	1.01	300	IN	40	herbaceous	450	10.4	467	5.9	79.1525	3	0.0360941	0.439367			0.204615					0.434384		-0.708337	0.243064	0.114113	0.128951	-0.106483
49	Zhang et al.,2016	31.24	119.41	1177	15.7	Field	0.33	medium	Paddy	6.5	24	1.8	1.01	300	IN	0	herbaceous	450	10.4	467	5.9	79.1525	3	0.00768643	-0.0128481			0.150935					0.10168		0.962571	0.26026	0.0565122	0.203748	-0.0200007
49	Zhang et al.,2016	31.24	119.41	1177	15.7	Field	0.33	medium	Paddy	6.5	24	1.8	1.01	300	IN	10	herbaceous	450	10.4	467	5.9	79.1525	3	0.040822	0.142533			0.207288					0.070908		0.44839	0.126606	0.140773	-0.0141669	-0.0507723
49	Zhang et al.,2016	31.24	119.41	1177	15.7	Field	0.33	medium	Paddy	6.5	24	1.8	1.01	300	IN	40	herbaceous	450	10.4	467	5.9	79.1525	3	0.0437806	0.426519			0.355551					0.536064		0.254234	0.503324	0.170626	0.332699	-0.126484
50	Wu et al.,2019	31.52	118.5	1050	15.7	Field	6	medium	U-P	5.7	14.6	1.32	1.28	0	None	20	herbaceous	500	9.4	467	5.9	79.1525	3	0.00312419	0.276557		0.0951251	0.00101396					0.030043		0.245122	0.0574061	-0.0223185	0.0797246			0.0294547	0.0672737
50	Wu et al.,2019	31.52	118.5	1050	15.7	Field	6	medium	U-P	5.7	14.6	1.32	1.28	0	None	40	herbaceous	500	9.4	467	5.9	79.1525	3	0.0404698	0.461612		0.119592	0.000681497					-0.0256559		0.105361	-0.00960209	-0.0205839	0.0109818			0.0339113	0.0807368
50	Wu et al.,2019	31.52	118.5	1050	15.7	Field	6	medium	U-P	5.7	14.6	1.32	1.28	250	IN	20	herbaceous	500	9.4	467	5.9	79.1525	3	0.0661982	0.256635		0.104416	0.0165626					-0.118714		-0.217494	-0.171201	0.0756737	-0.246875			0.0434952	0.0645548
50	Wu et al.,2019	31.52	118.5	1050	15.7	Field	6	medium	U-P	5.7	14.6	1.32	1.28	250	IN	40	herbaceous	500	9.4	467	5.9	79.1525	3	0.111403	0.424348		0.180085	0.09965					-0.191782		-0.305786	-0.252143	0.0883055	-0.340448			0.0456202	0.0712308
50	Wu et al.,2019	31.52	118.5	1050	15.7	Field	6	medium	U-P	5.7	14.6	1.32	1.28	250	IN	0	herbaceous	500	9.4	467	5.9	79.1525	3	-0.177645	0.0690404		0.134259	0.0677412					0.766387		2.9761	1.428	0.61917	0.808833			0.0339113	0.196768
50	Wu et al.,2019	31.52	118.5	1050	15.7	Field	6	medium	U-P	5.7	14.6	1.32	1.28	250	IN	20	herbaceous	500	9.4	467	5.9	79.1525	3	-0.111447	0.325675		0.238674	0.0843038					0.647673		2.7586	1.2568	0.694844	0.561958			0.0774065	0.261323
50	Wu et al.,2019	31.52	118.5	1050	15.7	Field	6	medium	U-P	5.7	14.6	1.32	1.28	250	IN	40	herbaceous	500	9.4	467	5.9	79.1525	3	-0.0662421	0.493388		0.314343	0.167391					0.574605		2.67031	1.17586	0.707475	0.468385			0.0795315	0.267999
51	Azeem et al.,2019	33.1	73.3	769.92	22.54	Field	1	coarse	upland	8.25	5.07	1.03	1.46	0	None	5	biowaste	350	6.68		1.4		3	-0.00364299	0.0821947	0.0425596		0.126909				-0.018602					0.0226181		-0.0348467
51	Azeem et al.,2019	33.1	73.3	769.92	22.54	Field	1	coarse	upland	8.25	5.07	1.03	1.46	0	None	10	biowaste	350	6.68		1.4		3	-0.0171153	0.207536	0.103184		0.242105				0.0172564					0.0694285		-0.0491327
51	Azeem et al.,2019	33.1	73.3	769.92	22.54	Field	1	coarse	upland	8.25	5.07	1.03	1.46	23	IN	0	biowaste	350	6.68		1.4		3	-0.0195845	0.0211907	0.0215062		0.19977				0.037184					0.119959		-0.00687288
51	Azeem et al.,2019	33.1	73.3	769.92	22.54	Field	1	coarse	upland	8.25	5.07	1.03	1.46	23	IN	5	biowaste	350	6.68		1.4		3	-0.00852105	0.0745786	0.0631789		0.223803				0.0226094					0.163907		-0.0277796
51	Azeem et al.,2019	33.1	73.3	769.92	22.54	Field	1	coarse	upland	8.25	5.07	1.03	1.46	23	IN	10	biowaste	350	6.68		1.4		3	0.00483677	0.180398	0.122602		0.218512				0.0496024					0.204673		-0.0491327
51	Azeem et al.,2019	33.1	73.3	769.92	22.54	Field	1	coarse	upland	8.25	5.07	1.03	1.46	0	None	5	biowaste	350	6.68		1.4		3	0.002442	0.10813	-0.0219789		0.0897046				-0.368374					0.0597059		-0.0141846
51	Azeem et al.,2019	33.1	73.3	769.92	22.54	Field	1	coarse	upland	8.25	5.07	1.03	1.46	0	None	10	biowaste	350	6.68		1.4		3	0.00609386	0.210998	-0.0444518		0.141589				-0.190651					0.11482		-0.0358461
51	Azeem et al.,2019	33.1	73.3	769.92	22.54	Field	1	coarse	upland	8.25	5.07	1.03	1.46	23	IN	0	biowaste	350	6.68		1.4		3	-0.007362	0.0257663	0.0425596		0.0504839				0.0596302					0.183622		0.00701757
51	Azeem et al.,2019	33.1	73.3	769.92	22.54	Field	1	coarse	upland	8.25	5.07	1.03	1.46	23	IN	5	biowaste	350	6.68		1.4		3	-0.00490197	0.0844251	0		0.144395				-0.264702					0.238272		-0.0141846
51	Azeem et al.,2019	33.1	73.3	769.92	22.54	Field	1	coarse	upland	8.25	5.07	1.03	1.46	23	IN	10	biowaste	350	6.68		1.4		3	0.00487806	0.199038	0.0425596		0.225083				-0.237454					0.284233		-0.0431722
51	Azeem et al.,2019	33.1	73.3	706.64	22.58	Field	1	coarse	upland	8.25	5.07	1.03	1.46	0	None	5	biowaste	350	6.68		1.4		3	-0.00486028	0.117066	-0.0219789		0.0641029				-0.238183					0.0577834		-0.0279739
51	Azeem et al.,2019	33.1	73.3	706.64	22.58	Field	1	coarse	upland	8.25	5.07	1.03	1.46	0	None	10	biowaste	350	6.68		1.4		3	-0.0171153	0.263604	-0.0444518		0.240415				-0.142752					0.0906222		-0.0494801
51	Azeem et al.,2019	33.1	73.3	706.64	22.58	Field	1	coarse	upland	8.25	5.07	1.03	1.46	23	IN	0	biowaste	350	6.68		1.4		3	-0.0195845	0.0223295	0.0425596		0.0575455				0.064233					0.139342		-0.0209067
51	Azeem et al.,2019	33.1	73.3	706.64	22.58	Field	1	coarse	upland	8.25	5.07	1.03	1.46	23	IN	5	biowaste	350	6.68		1.4		3	-0.00852105	0.229574	0.0215062		0.102569				-0.159811					0.187133		-0.0279739
51	Azeem et al.,2019	33.1	73.3	706.64	22.58	Field	1	coarse	upland	8.25	5.07	1.03	1.46	23	IN	10	biowaste	350	6.68		1.4		3	0.00362977	0.27592	0.0425596		0.212636				-0.092103					0.228915		-0.0567528
51	Azeem et al.,2019	33.1	73.3	706.64	22.58	Field	1	coarse	upland	8.25	5.07	1.03	1.46	0	None	5	biowaste	350	6.68		1.4		3	0.00243605	0.138358	-0.0434851		-0.0850185				-0.567822					0.0656897		-0.014286
51	Azeem et al.,2019	33.1	73.3	706.64	22.58	Field	1	coarse	upland	8.25	5.07	1.03	1.46	0	None	10	biowaste	350	6.68		1.4		3	-0.00734397	0.271012	-0.065958		-0.00628933				-0.49156					0.200186		-0.0434851
51	Azeem et al.,2019	33.1	73.3	706.64	22.58	Field	1	coarse	upland	8.25	5.07	1.03	1.46	23	IN	0	biowaste	350	6.68		1.4		3	-0.0122701	0.0160003	0.0210534		0.0339016				0.155067					0.275484		0.00706717
51	Azeem et al.,2019	33.1	73.3	706.64	22.58	Field	1	coarse	upland	8.25	5.07	1.03	1.46	23	IN	5	biowaste	350	6.68		1.4		3	-0.009804	0.15092	0		-0.0680976				-0.463972					0.216721		-0.0215062
51	Azeem et al.,2019	33.1	73.3	706.64	22.58	Field	1	coarse	upland	8.25	5.07	1.03	1.46	23	IN	10	biowaste	350	6.68		1.4		3	-0.00488999	0.290501	0.0210534		0.00312989				-0.379231					0.359484		-0.036105
52	Edwards et al.,2018	40.06	-88.23	653	22	Field	1	medium	upland	6.4	40	1.9		0	None	100	wood	550	8.89	808	6.3	128.254	4												-0.731726
52	Edwards et al.,2018	40.06	-88.23	653	22	Field	1	medium	upland	6.4	40	1.9		265	IN	0	wood	550	8.89	808	6.3	128.254	4												0.542089
52	Edwards et al.,2018	40.06	-88.23	653	22	Field	1	medium	upland	6.4	40	1.9		265	IN	100	wood	550	8.89	808	6.3	128.254	4												0.125587
53	Fungo et al., 2017	0.09	34.57	2000	26	Field	2	fine	Upland	6	23.3			2.5	OF	0	wood	550	6.3	868	27	32.1481	3									0.280902		-0.0678226	0	-0.161641	0.0200676	-0.181709
53	Fungo et al., 2017	0.09	34.57	2000	26	Field	2	fine	Upland	6	23.3			5	OF	0	wood	550	6.3	868	27	32.1481	3									0.260283		-0.0504309	0	-0.127155	0.00673403	-0.133889
53	Fungo et al., 2017	0.09	34.57	2000	26	Field	2	fine	Upland	6	23.3			120	IN	0	wood	550	6.3	868	27	32.1481	3									0.102654		-0.0678226	0	-0.110348	0.0716919	-0.18204
53	Fungo et al., 2017	0.09	34.57	2000	26	Field	2	fine	Upland	6	23.3			120+2.5	IN+OF	0	wood	550	6.3	868	27	32.1481	3									0.301105		-0.15963	0	-0.354545	0.217723	-0.572269
53	Fungo et al., 2017	0.09	34.57	2000	26	Field	2	fine	Upland	6	23.3			120+5	IN+OF	0	wood	550	6.3	868	27	32.1481	3									0.280902		-0.140582	-0.405465	-0.127155	0.255061	-0.382216
53	Fungo et al., 2017	0.09	34.57	2000	26	Field	2	fine	Upland	6	23.3			0	None	2.5	wood	550	6.3	868	27	32.1481	3									0.0779615		-0.15963	-0.405465	-0.127155	-0.145182	0.0180268
53	Fungo et al., 2017	0.09	34.57	2000	26	Field	2	fine	Upland	6	23.3			2.5	OF	2.5	wood	550	6.3	868	27	32.1481	3									0.173272		-0.198851	0	-0.467023	-0.16093	-0.306093
53	Fungo et al., 2017	0.09	34.57	2000	26	Field	2	fine	Upland	6	23.3			5	OF	2.5	wood	550	6.3	868	27	32.1481	3									0.301105		-0.282232	-0.405465	-0.354545	0.161843	-0.516388
53	Fungo et al., 2017	0.09	34.57	2000	26	Field	2	fine	Upland	6	23.3			120	IN	2.5	wood	550	6.3	868	27	32.1481	3									0.217723		-0.260726	-0.405465	-0.420503	0.291055	-0.711558
53	Fungo et al., 2017	0.09	34.57	2000	26	Field	2	fine	Upland	6	23.3			120+2.5	IN+OF	2.5	wood	550	6.3	868	27	32.1481	3									0.217723		-0.103541	0	-0.14425	0.138586	-0.282836
53	Fungo et al., 2017	0.09	34.57	2000	26	Field	2	fine	Upland	6	23.3			120+5	IN+OF	2.5	wood	550	6.3	868	27	32.1481	3									0.173272		-0.584513	-0.405465	-0.946596	0.132686	-1.07928
54	Gao et al.,2019	41.5	123.24	500	8.3	pot			paddy	6.8	15.39	1.87	1.46	210	IN	0	herbaceous	400	9.8	624.2	20	31.2	3						-0.170022						0.536348		1.60964		-0.0623039
54	Gao et al.,2019	41.5	123.24	500	8.3	pot			paddy	6.8	15.39	1.87	1.46	168	IN	0	herbaceous	400	9.8	624.2	20	31.2	3						-0.422548						0.464651		1.47167		-0.0551864
54	Gao et al.,2019	41.5	123.24	500	8.3	pot			paddy	6.8	15.39	1.87	1.46	0	None	15	herbaceous	400	9.8	624.2	20	31.2	3						0.0159555						-0.386206		0.109864		-0.0481192
54	Gao et al.,2019	41.5	123.24	500	8.3	pot			paddy	6.8	15.39	1.87	1.46	210	IN	15	herbaceous	400	9.8	624.2	20	31.2	3						-0.452032						-0.0557391		1.48197		-0.0766926
54	Gao et al.,2019	41.5	123.24	500	8.3	pot			paddy	6.8	15.39	1.87	1.46	168	IN	15	herbaceous	400	9.8	624.2	20	31.2	3						-0.286024						-0.263515		1.38908		-0.0986715
54	Gao et al.,2019	41.5	123.24	500	8.3	pot			paddy	6.8	15.39	1.87	1.46	0	None	45	herbaceous	400	9.8	624.2	20	31.2	3						-0.200477						-0.69864		0.236042		-0.167664
54	Gao et al.,2019	41.5	123.24	500	8.3	pot			paddy	6.8	15.39	1.87	1.46	210	IN	45	herbaceous	400	9.8	624.2	20	31.2	3						-0.446828						-0.526091		1.40463		-0.128749
54	Gao et al.,2019	41.5	123.24	500	8.3	pot			paddy	6.8	15.39	1.87	1.46	168	IN	45	herbaceous	400	9.8	624.2	20	31.2	3						-0.165922						-0.534468		1.33211		-0.151916
54	Gao et al.,2019	41.5	123.24	500	8.3	pot			paddy	6.8	15.39	1.87	1.46	210	IN	0	herbaceous	800	10.4	665.5	16.4	40.6	3						-0.112768						0.113858		1.50686		0.0481192
54	Gao et al.,2019	41.5	123.24	500	8.3	pot			paddy	6.8	15.39	1.87	1.46	168	IN	0	herbaceous	800	10.4	665.5	16.4	40.6	3						-0.14304						0.216071		1.44292		0.00701757
54	Gao et al.,2019	41.5	123.24	500	8.3	pot			paddy	6.8	15.39	1.87	1.46	0	None	15	herbaceous	800	10.4	665.5	16.4	40.6	3						-0.104134						-0.958096		-0.120986		0
54	Gao et al.,2019	41.5	123.24	500	8.3	pot			paddy	6.8	15.39	1.87	1.46	210	IN	15	herbaceous	800	10.4	665.5	16.4	40.6	3						-0.215804						-0.276004		1.35811		0.00701757
54	Gao et al.,2019	41.5	123.24	500	8.3	pot			paddy	6.8	15.39	1.87	1.46	168	IN	15	herbaceous	800	10.4	665.5	16.4	40.6	3						-0.169583						-0.0550902		1.36811		-0.0285734
54	Gao et al.,2019	41.5	123.24	500	8.3	pot			paddy	6.8	15.39	1.87	1.46	0	None	45	herbaceous	800	10.4	665.5	16.4	40.6	3						-0.038494						-1.12221		-0.058911		-0.11164
54	Gao et al.,2019	41.5	123.24	500	8.3	pot			paddy	6.8	15.39	1.87	1.46	210	IN	45	herbaceous	800	10.4	665.5	16.4	40.6	3						-0.279018						-0.826179		1.41755		-0.0505523
54	Gao et al.,2019	41.5	123.24	500	8.3	pot			paddy	6.8	15.39	1.87	1.46	168	IN	45	herbaceous	800	10.4	665.5	16.4	40.6	3						-0.112364						-0.648028		1.2799		-0.0431722
55	Grutzmacher et al.,2018	-22.71	-46.98			incubation		coarse		5.1	13.34			0	None	5	biowaste	400	7.4	205	23	9	4												0.133117
55	Grutzmacher et al.,2018	-22.71	-46.98			incubation		coarse		5.1	13.34			0	None	5	biowaste	400	10.8	340	37	9.1	4												0.826265
55	Grutzmacher et al.,2018	-22.71	-46.98			incubation		coarse		5.1	13.34			0	None	5	wood	400	9.5	25.8	15	16.7	4												0.364919
55	Grutzmacher et al.,2018	-22.71	-46.98			incubation		coarse		5.1	13.34			0	None	5	biowaste	400	8.3	759	3	150	4												-0.303255
55	Grutzmacher et al.,2018	-22.71	-46.98			incubation		coarse		5.1	13.34			140	IN	0		400					4												2.55187
55	Grutzmacher et al.,2018	-22.71	-46.98			incubation		coarse		5.1	13.34			140	IN	5	biowaste	400	7.4	205	23	9	4												0.539548
55	Grutzmacher et al.,2018	-22.71	-46.98			incubation		coarse		5.1	13.34			140	IN	5	biowaste	400	10.8	340	37	9.1	4												1.38547
55	Grutzmacher et al.,2018	-22.71	-46.98			incubation		coarse		5.1	13.34			140	IN	5	biowaste	400	9.5	25.8	15	16.7	4												0.961606
55	Grutzmacher et al.,2018	-22.71	-46.98			incubation		coarse		5.1	13.34			140	IN	5	biowaste	400	8.3	759	3	150	4												1.52951
55	Grutzmacher et al.,2018	-22.71	-46.98			incubation		coarse		5.1	13.34			140	IN	5	biowaste	400	7.4	205	23	9	4												-2.01233
55	Grutzmacher et al.,2018	-22.71	-46.98			incubation		coarse		5.1	13.34			140	IN	5	biowaste	400	10.8	340	37	9.1	4												-1.16641
55	Grutzmacher et al.,2018	-22.71	-46.98			incubation		coarse		5.1	13.34			140	IN	5	biowaste	400	9.5	25.8	15	16.7	4												-1.59027
55	Grutzmacher et al.,2018	-22.71	-46.98			incubation		coarse		5.1	13.34			140	IN	5	biowaste	400	8.3	759	3	150	4												-1.02237
56	Cheng et al.,2020	31.14	119.46	1177	15.7	incubation		fine		4.82	20.23	1.83		0	None	40	herbaceous	450	10.9	503	9.37	53.682	3	0.135424		0.464906			-0.0716746	-0.0550093					0.0225954						-0.0348186	0.023753	0.010978	0.0126339	0.0121523
56	Cheng et al.,2020	31.14	119.46	1177	15.7	incubation		fine		4.82	20.23	1.83		200	IN	0							3	0.0689929		0.480484			1.53239	0.394001					3.06312						0.0205943	0.050477	0.0081728	-0.00784659	-0.00582577
56	Cheng et al.,2020	31.14	119.46	1177	15.7	incubation		fine		4.82	20.23	1.83		200	IN	40							3	0.157854		0.966334			1.26078	0.636251					1.84918						0.013391	0.108532	0.0251776	0.0141211	0.0269326
56	Cheng et al.,2020	31.44	118.46	1106	15.4	incubation		fine		7.39	11.2	1.3		0	None	40							3	0.0228045		0.0460408			0.010837	0.0495522					-0.447373						-0.0485995	-0.00397131	-0.00876923	-0.00275938	0.00389718
56	Cheng et al.,2020	31.44	118.46	1106	15.4	incubation		fine		7.39	11.2	1.3		200	IN	0							3	-0.0233367		-0.0297841			1.99254	1.20649					2.18105						0.0510133	0.0633219	-0.00541512	-0.00644516	-0.013527
56	Cheng et al.,2020	31.44	118.46	1106	15.4	incubation		fine		7.39	11.2	1.3		200	IN	40							3	0.0188178		0.0410947			1.86395	1.19609					3.42027						-0.0122051	0.110533	0.00179946	-0.00431844	0.00287015
56	Cheng et al.,2020	33.19	120.45	1045	16	incubation		fine		8.05	17.83	0.7		0	None	40							3	0.0436433		0.233365			-0.14105	-0.108801					0.0261816						-0.0132184	-0.00209589	-0.00328508	-0.000693992	0.0121921
56	Cheng et al.,2020	33.19	120.45	1045	16	incubation		fine		8.05	17.83	0.7		200	IN	0							3	-0.0175004		0.132864			1.47713	1.17884					5.68845						0.0119047	0.112696	0.00549178	-0.00136824	-0.0117659
56	Cheng et al.,2020	33.19	120.45	1045	16	incubation		fine		8.05	17.83	0.7		200	IN	40							3	0.0135387		0.26508			1.36315	1.10393					3.96658						3.39391e-05	0.147606	0.0257518	0.00230905	0.00800253
57	Li et al., 2018	32.01	118.52			incubation		fine	upland	5.5	15.6	1.9	1.2	0	None	40	herbaceous	500	9.4	467	5.6	83.3929	3						-0.154819	-0.0281103					-0.130201						0.515217	0.18358	-0.250356	0.072558	-0.0604525
57	Li et al., 2018	32.01	118.52			incubation		fine	upland	5.5	15.6	1.9	1.2	1250	IN	40	herbaceous	500	9.4	467	5.6	83.3929	3						-0.233905	0.879389					-0.287676						-0.626972	0.34212	0.691421	0.66929	0.277235
57	Li et al., 2018	32.01	118.52			incubation		fine	upland	5.5	15.6	1.9	1.2	1250	IN	0	herbaceous	500	9.4	467	5.6	83.3929	3						1.85495	-2.74535					1.9501						0.317728	-0.838576	1.53593	0.550446	0.734587
57	Li et al., 2018	32.01	118.52			incubation		fine	upland	5.5	15.6	1.9	1.2	1250	IN	40	herbaceous	500	9.4	467	5.6	83.3929	3						1.62104	-1.86596					1.66242						-0.309243	-0.496457	2.22735	1.21974	1.01182
57	Li et al., 2018	32.01	118.52			incubation		fine	upland	5.5	15.6	1.9	1.2	1250	IN	40	herbaceous	500	9.4	467	5.6	83.3929	3						1.77586	-1.83785					1.79263						-0.824461	-0.680036	2.47771	1.14718	1.07227
58	Li et al., 2017	34.17	108.04			incubation		medium		7.01	3.32	0.47		0	None	10	wood	450	9.67	670.15	5.7	117.57	3									-0.100083
58	Li et al., 2017	34.17	108.04			incubation		medium		7.01	3.32	0.47		0	None	20	wood	450	9.67	670.15	5.7	117.57	3									0.0909718
58	Li et al., 2017	34.17	108.04			incubation		medium		7.01	3.32	0.47		0	None	40	wood	450	9.67	670.15	5.7	117.57	3									0.322773
58	Li et al., 2017	34.17	108.04			incubation		medium		7.01	3.32	0.47		200	IN	0	wood	450	9.67	670.15	5.7	117.57	3									0.0909718
58	Li et al., 2017	34.17	108.04			incubation		medium		7.01	3.32	0.47		200	IN	10	wood	450	9.67	670.15	5.7	117.57	3									0.0689929
58	Li et al., 2017	34.17	108.04			incubation		medium		7.01	3.32	0.47		200	IN	20	wood	450	9.67	670.15	5.7	117.57	3									0.194156
58	Li et al., 2017	34.17	108.04			incubation		medium		7.01	3.32	0.47		200	IN	40	wood	450	9.67	670.15	5.7	117.57	3									0.356675
59	Li et al., 2020	34.18	108.02	599	14	Field	3	medium	upland	7.01	3.32	0.47		0	None	20	wood	450	9.67	670.15	5.7	117.57	3									0.0362935
59	Li et al., 2020	34.18	108.02	599	14	Field	3	medium	upland	7.01	3.32	0.47		0	None	40	wood	450	9.67	670.15	5.7	117.57	3									-0.00326345
59	Li et al., 2020	34.18	108.02	599	14	Field	3	medium	upland	7.01	3.32	0.47		120	IN	0	wood	450	9.67	670.15	5.7	117.57	3									0.119497
59	Li et al., 2020	34.18	108.02	599	14	Field	3	medium	upland	7.01	3.32	0.47		120	IN	20	wood	450	9.67	670.15	5.7	117.57	3									0.0522809
59	Li et al., 2020	34.18	108.02	599	14	Field	3	medium	upland	7.01	3.32	0.47		120	IN	40	wood	450	9.67	670.15	5.7	117.57	3									0.0262531
59	Li et al., 2020	34.18	108.02	599	14	Field	3	medium	upland	7.01	3.32	0.47		240	IN	0	wood	450	9.67	670.15	5.7	117.57	3									0.122684
59	Li et al., 2020	34.18	108.02	599	14	Field	3	medium	upland	7.01	3.32	0.47		240	IN	20	wood	450	9.67	670.15	5.7	117.57	3									0.193658
59	Li et al., 2020	34.18	108.02	599	14	Field	3	medium	upland	7.01	3.32	0.47		240	IN	40	wood	450	9.67	670.15	5.7	117.57	3									0.181372
60	Feng et al., 2017	30.18	120.3			pot		medium		7.32	1.7	0.5		0	None	17.4	herbaceous	300	8.9	495.7	17.5	28.33	3	0.0493105											-0.308884
60	Feng et al., 2017	30.18	120.3			pot		medium		7.32	1.7	0.5		0	None	17.4	herbaceous	500	10.43	584.1	14.9	39.2	3	0.0825616											-1.07102
60	Feng et al., 2017	30.18	120.3			pot		medium		7.32	1.7	0.5		0	None	17.4	herbaceous	700	11.06	565.9	11.7	48.37	3	0.0647946											-1.35193
60	Feng et al., 2017	30.18	120.3			pot		medium		7.32	1.7	0.5		87	IN	0							3	-0.0109891											0.530217
60	Feng et al., 2017	30.18	120.3			pot		medium		7.32	1.7	0.5		87	IN	17.4	herbaceous	300	8.9	495.7	17.5	28.33	3	0.0414775											0.020762
60	Feng et al., 2017	30.18	120.3			pot		medium		7.32	1.7	0.5		87	IN	17.4	herbaceous	500	10.43	584.1	14.9	39.2	3	0.0749858											-0.83571
60	Feng et al., 2017	30.18	120.3			pot		medium		7.32	1.7	0.5		87	IN	17.4	herbaceous	700	11.06	565.9	11.7	48.37	3	0.0711763											-1.1127
60	Feng et al., 2017	30.18	120.3			pot		medium		7.32	1.7	0.5		174	IN	0							3	0.0202847											1.4797
60	Feng et al., 2017	30.18	120.3			pot		medium		7.32	1.7	0.5		174	IN	17.4	herbaceous	300	8.9	495.7	17.5	28.33	3	0.0375379											1.66122
60	Feng et al., 2017	30.18	120.3			pot		medium		7.32	1.7	0.5		174	IN	17.4	herbaceous	500	10.43	584.1	14.9	39.2	3	0.0660742											1.41728
60	Feng et al., 2017	30.18	120.3			pot		medium		7.32	1.7	0.5		174	IN	17.4	herbaceous	700	11.06	565.9	11.7	48.37	3	0.0850742											1.46202
60	Feng et al., 2017	30.18	120.3			pot		medium		7.32	1.7	0.5		348	IN	0							3	0.0149155											1.8777
60	Feng et al., 2017	30.18	120.3			pot		medium		7.32	1.7	0.5		348	IN	17.4	herbaceous	700	8.9	495.7	17.5	28.33	3	0.0699032											2.59828
60	Feng et al., 2017	30.18	120.3			pot		medium		7.32	1.7	0.5		174	IN	34.8	herbaceous	700	10.43	584.1	14.9	39.2	3	0.0963032											1.20257
60	Feng et al., 2017	30.18	120.3			pot		medium		7.32	1.7	0.5		174	IN	8.7	herbaceous	700	11.06	565.9	11.7	48.37	3	0.0467063											2.1347
61	Liu et al., 2019	31.03	104.1	890	16.3	Field	1	medium	paddy	6	20.1	1.8		0	None	20	herbaceous	450	10.4	470	6	78.3333	3	0.0404532	0.103484		-0.112309	0.0160708			0.0356318		0.569176		0.0101065	0.556676	-0.023351	0.580027	-0.0454649
61	Liu et al., 2019	31.03	104.1	890	16.3	Field	1	medium	paddy	6	20.1	1.8		0	None	40	herbaceous	450	10.4	470	6	78.3333	3	0.125904	0.333954		-0.238742	0.0318874			-0.0562607		-0.743735		0.516732	-0.635314	-0.015435	-0.619879	-0.0931152
61	Liu et al., 2019	31.03	104.1	890	16.3	Field	1	medium	paddy	6	20.1	1.8		150	IN	0	herbaceous	450	10.4	470	6	78.3333	3	-0.0336771	0.0293037		-0.279747	0.0240131			-0.115806		0.216842		3.20477	1.01552	0.0671914	0.948329	-0.029978
61	Liu et al., 2019	31.03	104.1	890	16.3	Field	1	medium	paddy	6	20.1	1.8		150	IN	20	herbaceous	450	10.4	470	6	78.3333	3	0.0258897	0.0854481		-0.0481009	0.0358068			0.119531		-0.332002		2.69265	0.596686	0.0744025	0.522284	-0.0449053
61	Liu et al., 2019	31.03	104.1	890	16.3	Field	1	medium	paddy	6	20.1	1.8		150	IN	40	herbaceous	450	10.4	470	6	78.3333	3	0.0892155	0.29782		-0.0422125	0.132573			0.0754593		-1.15868		2.46925	0.132561	0.0744609	0.0581002	-0.0619537
61	Liu et al., 2019	31.03	104.1	890	16.3	Field	1	medium	paddy	6	20.1	1.8		0	None	20	herbaceous	450	10.4	470	6	78.3333	3	0.0589509	0.0704588		-0.029859	0.0509621			0.221194		-0.704449		-1.42827	-1.26218	-0.0660198	-1.19616	-0.0677849
61	Liu et al., 2019	31.03	104.1	890	16.3	Field	1	medium	paddy	6	20.1	1.8		0	None	40	herbaceous	450	10.4	470	6	78.3333	3	0.0826035	0.326325		-0.0766962	0.0835504			-0.0753417		-0.607074		-1.60991	-1.32172	-0.136678	-1.18504	-0.127289
61	Liu et al., 2019	31.03	104.1	890	16.3	Field	1	medium	paddy	6	20.1	1.8		150	IN	0	herbaceous	450	10.4	470	6	78.3333	3	0.0200872	0		-0.0369107	-0.158294			0.125528		-1.42058		0.850726	0.642849	0.413256	0.229593	-0.0219927
61	Liu et al., 2019	31.03	104.1	890	16.3	Field	1	medium	paddy	6	20.1	1.8		150	IN	20	herbaceous	450	10.4	470	6	78.3333	3	0.0297778	0.12714		0.0378436	-0.11827			0.0977083		-0.291436		0.542993	0.40664	0.399093	0.00754741	-0.0741296
61	Liu et al., 2019	31.03	104.1	890	16.3	Field	1	medium	paddy	6	20.1	1.8		150	IN	40	herbaceous	450	10.4	470	6	78.3333	3	0.113009	0.287973		0.100721	-0.0648002			0.269209		0.141224		-0.2221	-0.180506	0.391967	-0.572473	-0.0875906
61	Liu et al., 2019	31.03	104.1	890	16.3	Field	1	medium	paddy	6	20.1	1.8		0	None	20	herbaceous	450	10.4	470	6	78.3333	3	0.0327054	0.13018		0.0612999	0.08569			0.099552		-0.145496		0.000962882	-0.108132	4.27324e-05	-0.108174
61	Liu et al., 2019	31.03	104.1	890	16.3	Field	1	medium	paddy	6	20.1	1.8		0	None	40	herbaceous	450	10.4	470	6	78.3333	3	0.0596969	0.22335		-0.0356463	0.12593			0.139258		-0.0847344		-0.150348	-0.0756241	0.0249923	-0.100616
61	Liu et al., 2019	31.03	104.1	890	16.3	Field	1	medium	paddy	6	20.1	1.8		150	IN	0	herbaceous	450	10.4	470	6	78.3333	3	0.0032532	0		-0.206933	0.191839			-0.294569		-0.0274557		0.760627	0.0716679	0.270884	-0.199216
61	Liu et al., 2019	31.03	104.1	890	16.3	Field	1	medium	paddy	6	20.1	1.8		150	IN	20	herbaceous	450	10.4	470	6	78.3333	3	0.0225754	0.122007		0.0104825	0.218339			0.0431801		-0.315825		0.453101	-0.17484	0.270924	-0.445764
61	Liu et al., 2019	31.03	104.1	890	16.3	Field	1	medium	paddy	6	20.1	1.8		150	IN	40	herbaceous	450	10.4	470	6	78.3333	3	0.0575004	0.280968		-0.0438416	0.269325			0.125579		-0.600302		0.762147	-0.305031	0.277352	-0.582383
62	iu et al., 2014	35	114.24			incubation				7.55	6.59	0.76		300	IN	0	herbaceous	500	10.1	639	8.87	72.0406	3			-0.249679						0.30486
62	iu et al., 2014	35	114.24			incubation				7.55	6.59	0.76		0	None	15	herbaceous	500	10.1	639	8.87	72.0406	3			-0.136576						0.0853598
62	iu et al., 2014	35	114.24			incubation				7.55	6.59	0.76		300	IN	15	herbaceous	500	10.1	639	8.87	72.0406	3			-0.13283						0.290154
63	Maestrini et al., 2014	47.28	8.21			incubation		coarse		5.72	25.6	2.93	1.4	0	None	27	herbaceous	450	10.02	344	33.87	9.3	4									-0.012739
63	Maestrini et al., 2014	47.28	8.21			incubation		coarse		5.72	25.6	2.93	1.4	53	IN	0	herbaceous	450	10.02	344	33.87	9.3	4									0.0453686
63	Maestrini et al., 2014	47.28	8.21			incubation		coarse		5.72	25.6	2.93	1.4	53	IN	27	herbaceous	450	10.02	344	33.87	9.3	4									-0.0170217
64	Niu et al., 2017	35	114.24	615	13.9	Field	1	coarse	upland	8.81	7.41	0.85	1.4	0	None	3	herbaceous	450	10.02	450	14.8	30.41	3						-0.0454624	0.187212					0.434286		-0.0598472
64	Niu et al., 2017	35	114.24	615	13.9	Field	1	coarse	upland	8.81	7.41	0.85	1.4	0	None	6	herbaceous	450	10.02	450	14.8	30.41	3						0	0.223144					0.489548		-0.0554598
64	Niu et al., 2017	35	114.24	615	13.9	Field	1	coarse	upland	8.81	7.41	0.85	1.4	0	None	12	herbaceous	450	10.02	450	14.8	30.41	3						0.0219789	0.187212					0.657429		-0.029476
64	Niu et al., 2017	35	114.24	615	13.9	Field	1	coarse	upland	8.81	7.41	0.85	1.4	200	IN	0	herbaceous	450	10.02	450	14.8	30.41	3						0.537143	1.24008					1.75604		0.0485903
64	Niu et al., 2017	35	114.24	615	13.9	Field	1	coarse	upland	8.81	7.41	0.85	1.4	200	IN	3	herbaceous	450	10.02	450	14.8	30.41	3						0.562785	1.30992					1.24522		0.0326486
64	Niu et al., 2017	35	114.24	615	13.9	Field	1	coarse	upland	8.81	7.41	0.85	1.4	200	IN	6	herbaceous	450	10.02	450	14.8	30.41	3						0.367725	1.25696					1.37748		0.0720279
64	Niu et al., 2017	35	114.24	615	13.9	Field	1	coarse	upland	8.81	7.41	0.85	1.4	200	IN	12	herbaceous	450	10.02	450	14.8	30.41	3						0.510826	1.17412					1.32759		0.0123662
64	Niu et al., 2017	35	114.24	615	13.9	Field	1	coarse	upland	8.81	7.41	0.85	1.4	0	None	3	herbaceous	450	10.02	450	14.8	30.41	3						0.046957	-0.329182					0.167054		0.151774
64	Niu et al., 2017	35	114.24	615	13.9	Field	1	coarse	upland	8.81	7.41	0.85	1.4	0	None	6	herbaceous	450	10.02	450	14.8	30.41	3						0.0190482	-0.0892311					0.127833		0.232946
64	Niu et al., 2017	35	114.24	615	13.9	Field	1	coarse	upland	8.81	7.41	0.85	1.4	0	None	12	herbaceous	450	10.02	450	14.8	30.41	3						-0.0194181	-0.130053					0.241162		0.222644
64	Niu et al., 2017	35	114.24	615	13.9	Field	1	coarse	upland	8.81	7.41	0.85	1.4	200	IN	0	herbaceous	450	10.02	450	14.8	30.41	3						0.346042	1.9032					1.0033		0.550567
64	Niu et al., 2017	35	114.24	615	13.9	Field	1	coarse	upland	8.81	7.41	0.85	1.4	200	IN	3	herbaceous	450	10.02	450	14.8	30.41	3						0.238411	1.88485					0.934309		0.476201
64	Niu et al., 2017	35	114.24	615	13.9	Field	1	coarse	upland	8.81	7.41	0.85	1.4	200	IN	6	herbaceous	450	10.02	450	14.8	30.41	3						0.339216	2.02622					0.897942		0.459903
64	Niu et al., 2017	35	114.24	615	13.9	Field	1	coarse	upland	8.81	7.41	0.85	1.4	200	IN	12	herbaceous	450	10.02	450	14.8	30.41	3						0.405465	2.00346					0.986495		0.413454
64	Niu et al., 2017	35	114.24	615	13.9	Field	1	coarse	upland	8.81	7.41	0.85	1.4	0	None	3	herbaceous	450	10.02	450	14.8	30.41	3												0.366751				-0.0437849
64	Niu et al., 2017	35	114.24	615	13.9	Field	1	coarse	upland	8.81	7.41	0.85	1.4	0	None	6	herbaceous	450	10.02	450	14.8	30.41	3												0.401237				-0.0281795
64	Niu et al., 2017	35	114.24	615	13.9	Field	1	coarse	upland	8.81	7.41	0.85	1.4	0	None	12	herbaceous	450	10.02	450	14.8	30.41	3												0.557806				-0.057789
64	Niu et al., 2017	35	114.24	615	13.9	Field	1	coarse	upland	8.81	7.41	0.85	1.4	200	IN	0	herbaceous	450	10.02	450	14.8	30.41	3												1.59926				-0.0139506
64	Niu et al., 2017	35	114.24	615	13.9	Field	1	coarse	upland	8.81	7.41	0.85	1.4	200	IN	3	herbaceous	450	10.02	450	14.8	30.41	3												1.16789				-0.0369336
64	Niu et al., 2017	35	114.24	615	13.9	Field	1	coarse	upland	8.81	7.41	0.85	1.4	200	IN	6	herbaceous	450	10.02	450	14.8	30.41	3												1.26891				-0.0732059
64	Niu et al., 2017	35	114.24	615	13.9	Field	1	coarse	upland	8.81	7.41	0.85	1.4	200	IN	12	herbaceous	450	10.02	450	14.8	30.41	3												1.24732				-0.0734904
65	Oladele et al., 2019	7.2	5.3	1450	25.3	Field	2	coarse	upland	4.95	8.12			30	IN	0	lignocellulosic	375	8.5	511.3	0.3	1704.33	3									0.164504
65	Oladele et al., 2019	7.2	5.3	1450	25.3	Field	2	coarse	upland	4.95	8.12			60	IN	0	lignocellulosic	375	8.5	511.3	0.3	1704.33	3									0.281038
65	Oladele et al., 2019	7.2	5.3	1450	25.3	Field	2	coarse	upland	4.95	8.12			90	IN	0	lignocellulosic	375	8.5	511.3	0.3	1704.33	3									0.208467
65	Oladele et al., 2019	7.2	5.3	1450	25.3	Field	2	coarse	upland	4.95	8.12			0	None	3	lignocellulosic	375	8.5	511.3	0.3	1704.33	3									0.0703165
65	Oladele et al., 2019	7.2	5.3	1450	25.3	Field	2	coarse	upland	4.95	8.12			30	IN	3	lignocellulosic	375	8.5	511.3	0.3	1704.33	3									0.203076
65	Oladele et al., 2019	7.2	5.3	1450	25.3	Field	2	coarse	upland	4.95	8.12			60	IN	3	lignocellulosic	375	8.5	511.3	0.3	1704.33	3									0.219162
65	Oladele et al., 2019	7.2	5.3	1450	25.3	Field	2	coarse	upland	4.95	8.12			90	IN	3	lignocellulosic	375	8.5	511.3	0.3	1704.33	3									0.219162
65	Oladele et al., 2019	7.2	5.3	1450	25.3	Field	2	coarse	upland	4.95	8.12			0	None	6	lignocellulosic	375	8.5	511.3	0.3	1704.33	3									-0.104625
65	Oladele et al., 2019	7.2	5.3	1450	25.3	Field	2	coarse	upland	4.95	8.12			30	IN	6	lignocellulosic	375	8.5	511.3	0.3	1704.33	3									-0.188966
65	Oladele et al., 2019	7.2	5.3	1450	25.3	Field	2	coarse	upland	4.95	8.12			60	IN	6	lignocellulosic	375	8.5	511.3	0.3	1704.33	3									-0.0200676
65	Oladele et al., 2019	7.2	5.3	1450	25.3	Field	2	coarse	upland	4.95	8.12			90	IN	6	lignocellulosic	375	8.5	511.3	0.3	1704.33	3									-0.0828059
65	Oladele et al., 2019	7.2	5.3	1450	25.3	Field	2	coarse	upland	4.95	8.12			0	None	12	lignocellulosic	375	8.5	511.3	0.3	1704.33	3									-0.0900262
65	Oladele et al., 2019	7.2	5.3	1450	25.3	Field	2	coarse	upland	4.95	8.12			30	IN	12	lignocellulosic	375	8.5	511.3	0.3	1704.33	3									-0.0972989
65	Oladele et al., 2019	7.2	5.3	1450	25.3	Field	2	coarse	upland	4.95	8.12			60	IN	12	lignocellulosic	375	8.5	511.3	0.3	1704.33	3									0.0825866
65	Oladele et al., 2019	7.2	5.3	1450	25.3	Field	2	coarse	upland	4.95	8.12			90	IN	12	lignocellulosic	375	8.5	511.3	0.3	1704.33	3									-0.196998
66	Rizhiya et al., 2017	59.58	30.127			incubation		coarse		5.3				0	None	10	wood	550	7.6	2300			3												-0.303555
66	Rizhiya et al., 2017	59.58	30.127			incubation		coarse		5.3				90	IN	0	wood	550	7.6	2300			3												0.669192
66	Rizhiya et al., 2017	59.58	30.127			incubation		coarse		5.3				90	IN	10	wood	550	7.6	2300			3												0.364734
67	Sanchez et al., 2020	38.01	-1.09	275	18	Field	0.33	coarse		8.4	14			0	None		wood	600	11.1				5	-0.00727276	0.458109	-0.0679079			-0.0751799	-0.0392207					-0.104794
67	Sanchez et al., 2020	38.01	-1.09	275	18	Field	0.33	coarse		8.4	14			120	IN		wood	600	11.1				5	-0.0419297	0.203125	-0.190256			-0.039778	3.59942					-0.0496834
67	Sanchez et al., 2020	38.01	-1.09	275	18	Field	0.33	coarse		8.4	14			120	IN		wood	600	11.1				5	-0.0444518	0.591284	-0.243874			-0.118131	3.68503					-0.0604652
67	Sanchez et al., 2020	38.01	-1.09	275	18	Field	0.33	coarse		8.4	14			120	OF		wood	600	11.1				5	-0.0419297	0.126752	0.290717			2.07805	3.4414					0.312872
67	Sanchez et al., 2020	38.01	-1.09	275	18	Field	0.33	coarse		8.4	14			120	OF		wood	600	11.1				5	-0.0469802	0.365644	0.336472			1.30961	3.40376					0.235314
68	Shaukat et al., 2019	40	83.02			pot		medium	paddy	6.51	23.7	2	0.91	70	IN	0	wood		9.55	786	6.4	122.812	3										0.420563		0.643661	0.611282
68	Shaukat et al., 2019	40	83.02			pot		medium	paddy	6.51	23.7	2	0.91	140	IN	0	wood		9.55	786	6.4	122.812	3										0.276232		1.17021	1.07132
68	Shaukat et al., 2019	40	83.02			pot		medium	paddy	6.51	23.7	2	0.91	0	None	20	wood		9.55	786	6.4	122.812	3										0.647584		0.145497	0.244358
68	Shaukat et al., 2019	40	83.02			pot		medium	paddy	6.51	23.7	2	0.91	70	IN	20	wood		9.55	786	6.4	122.812	3										0.752667		0.276283	0.369074
68	Shaukat et al., 2019	40	83.02			pot		medium	paddy	6.51	23.7	2	0.91	140	IN	20	wood		9.55	786	6.4	122.812	3										0.51904		0.809309	0.768339
68	Shaukat et al., 2019	40	83.02			pot		medium	paddy	6.51	23.7	2	0.91	0	None	40	wood		9.55	786	6.4	122.812	3										0.716992		-0.16559	0.0380028
68	Shaukat et al., 2019	40	83.02			pot		medium	paddy	6.51	23.7	2	0.91	70	IN	40	wood		9.55	786	6.4	122.812	3										0.824141		0.19689	0.327052
68	Shaukat et al., 2019	40	83.02			pot		medium	paddy	6.51	23.7	2	0.91	140	IN	40	wood		9.55	786	6.4	122.812	3										0.474047		0.551546	0.539593
69	Sigua et al., 2016	34.29	-79.74			incubation			upland	5.6				100	IN	0							3									-0.0259755
69	Sigua et al., 2016	34.29	-79.74			incubation			upland	5.6				0	None	40	herbaceous	250	6.4	553	4.3	128.605	3									1.02779
69	Sigua et al., 2016	34.29	-79.74			incubation			upland	5.6				100	IN	40	herbaceous	250	6.4	553	4.3	128.605	3									1.11556
69	Sigua et al., 2016	34.29	-79.74			incubation			upland	5.6				0	None	40	herbaceous	500	9.2	844	3.4	248.235	3									-0.331357
69	Sigua et al., 2016	34.29	-79.74			incubation			upland	5.6				100	IN	40	herbaceous	500	9.2	844	3.4	248.235	3									-0.108214
70	Sui et al., 2016	41.5	123.24	500	8.3	Field	2		paddy	6.7	11	1.2	1.31	210	IN	0	herbaceous	450	9.1	670.7	8.1	82.8025	3	-0.118817	-0.0301383	0.0253178		0.0902868				0.904038	0.506485				0.273057		-0.0195446
70	Sui et al., 2016	41.5	123.24	500	8.3	Field	2		paddy	6.7	11	1.2	1.31	210	IN	1.78	herbaceous	450	9.1	670.7	8.1	82.8025	3	-0.0204089	0.0972174	0		0.118658				0.929681	-0.363486				0.308338		-0.0261453
70	Sui et al., 2016	41.5	123.24	500	8.3	Field	2		paddy	6.7	11	1.2	1.31	210	IN	14.8	herbaceous	450	9.1	670.7	8.1	82.8025	3	-0.00460194	0.171888	0.526093		0.173093				1.2462	0.379873				0.320267		-0.0394788
70	Sui et al., 2016	41.5	123.24	500	8.3	Field	2		paddy	6.7	11	1.2	1.31	210	IN	29.6	herbaceous	450	9.1	670.7	8.1	82.8025	3	0.162381	0.427664	0.16508		0.261758				0.852595	0.135766				0.351398		-0.0462128
70	Sui et al., 2016	41.5	123.24	500	8.3	Field	2		paddy	6.7	11	1.2	1.31	0	None	1.78	herbaceous	450	9.1	670.7	8.1	82.8025	3	-0.0213465	0.142811	-0.0800427		0.166448				0.0362973	0.816879				0.0250909		-0.0261453
70	Sui et al., 2016	41.5	123.24	500	8.3	Field	2		paddy	6.7	11	1.2	1.31	0	None	14.8	herbaceous	450	9.1	670.7	8.1	82.8025	3	0.00914083	0.26886	0.0253178		0.261758				-0.0572464	0.479489				0.0286245		-0.0736118
70	Sui et al., 2016	41.5	123.24	500	8.3	Field	2		paddy	6.7	11	1.2	1.31	0	None	29.6	herbaceous	450	9.1	670.7	8.1	82.8025	3	0.0235946	0.2282	-0.108214		0.205669				0.0917821	0.107987				-0.0426385		-0.0805805
71	Jiang et al., 2016	40.6	-104.4			incubation		coarse		7.66	7.9	0.92		80	IN	0	herbaceous	450				33.82	3									0.026784
71	Jiang et al., 2016	40.6	-104.4			incubation		coarse		7.66	7.9	0.92		0	None	400	herbaceous	450				33.82	3									-0.417602
71	Jiang et al., 2016	40.6	-104.4			incubation		coarse		7.66	7.9	0.92		80	IN	400	herbaceous	450				33.82	3									-0.23192
71	Jiang et al., 2016	36.6	-99.6			incubation		medium		7.67	7.9	0.92		80	IN	0	herbaceous	450				33.82	3									-0.0408195
71	Jiang et al., 2016	36.6	-99.6			incubation		medium		7.67	7.9	0.92		0	None	400	herbaceous	450				33.82	3									-0.395895
71	Jiang et al., 2016	36.6	-99.6			incubation		medium		7.67	7.9	0.92		80	IN	400	herbaceous	450				33.82	3									-0.442216
72	Wang et al., 2011	31.32	120.41			incubation		fine	paddy	7.4	27.9	1.9	1.2	0	None	50	lignocellulosic	450	9.1	465.4	6.2	75.0645	4	-0.0132102								0.0840759			-1.45043
72	Wang et al., 2011	31.32	120.41			incubation		fine	paddy	7.4	27.9	1.9	1.2	375	IN	0	lignocellulosic	450	9.1	465.4	6.2	75.0645	4	-0.0333587								0.216182			3.34349
72	Wang et al., 2011	31.32	120.41			incubation		fine	paddy	7.4	27.9	1.9	1.2	375	IN	50	lignocellulosic	450	9.1	465.4	6.2	75.0645	4	-0.0388009								0.198011			2.58078
72	Wang et al., 2011	28.13	113.17			incubation		medium	paddy	7.5	39.2	1.8	0.9	0	None	50	lignocellulosic	450	9.1	465.4	6.2	75.0645	4	0.0140577								-0.0952271			-2.88019
72	Wang et al., 2011	28.13	113.17			incubation		medium	paddy	7.5	39.2	1.8	0.9	375	IN	0	lignocellulosic	450	9.1	465.4	6.2	75.0645	4	-0.0487902								0.0728015			1.07385
72	Wang et al., 2011	28.13	113.17			incubation		medium	paddy	7.5	39.2	1.8	0.9	375	IN	50	lignocellulosic	450	9.1	465.4	6.2	75.0645	4	-0.032704								0.144991			-0.508484
72	Wang et al., 2011	31.32	120.41			incubation		fine	paddy	7.4	27.9	1.9	1.2	0	None	50	lignocellulosic	450	9.1	465.4	6.2	75.0645	4									0.130053			-1.35239
72	Wang et al., 2011	31.32	120.41			incubation		fine	paddy	7.4	27.9	1.9	1.2	375	IN	0	lignocellulosic	450	9.1	465.4	6.2	75.0645	4									0.348307			3.51155
72	Wang et al., 2011	31.32	120.41			incubation		fine	paddy	7.4	27.9	1.9	1.2	375	IN	50	lignocellulosic	450	9.1	465.4	6.2	75.0645	4									0.348307			2.14007
72	Wang et al., 2011	28.13	113.17			incubation		medium	paddy	7.5	39.2	1.8	0.9	0	None	50	lignocellulosic	450	9.1	465.4	6.2	75.0645	4									0.0266682			-2.87878
72	Wang et al., 2011	28.13	113.17			incubation		medium	paddy	7.5	39.2	1.8	0.9	375	IN	0	lignocellulosic	450	9.1	465.4	6.2	75.0645	4									0.217723			1.08719
72	Wang et al., 2011	28.13	113.17			incubation		medium	paddy	7.5	39.2	1.8	0.9	375	IN	50	lignocellulosic	450	9.1	465.4	6.2	75.0645	4									0.320908			-0.423109
73	Troy et al., 2013	53.1	-7.91			pot		coarse		6.9	17.5	2.1	1.1	0	None	18		600	9.6	725	26.7	27.1536	4									0.656702	-0.873123		0.0902056	0.593821
73	Troy et al., 2013	53.1	-7.91			pot		coarse		6.9	17.5	2.1	1.1	0	None	18		600	9.3	970	4.2	230.952	4									0.693736	-1.11695		-0.784851	0.605983
73	Troy et al., 2013	53.1	-7.91			pot		coarse		6.9	17.5	2.1	1.1	170	OF	18		600	9.6	725	26.7	27.1536	4									0.258342	0.143984		0.584955	0.280218
73	Troy et al., 2013	53.1	-7.91			pot		coarse		6.9	17.5	2.1	1.1	170	OF	18		600	9.3	970	4.2	230.952	4									0.375285	0.0909977		0.518725	0.350632
73	Troy et al., 2013	53.1	-7.91			pot		coarse		6.9	17.5	2.1	1.1	170	OF	0							4									0.987949	2.4889		1.70499	1.18491
73	Troy et al., 2013	53.1	-7.91			pot		coarse		6.9	17.5	2.1	1.1	170	OF	18		600	9.6	725	26.7	27.1536	4									1.24629	2.63289		2.28995	1.46513
73	Troy et al., 2013	53.1	-7.91			pot		coarse		6.9	17.5	2.1	1.1	170	OF	18		600	9.3	970	4.2	230.952	4									1.36323	2.5799		2.22372	1.53554
73	Troy et al., 2013	53.1	-7.91			pot		coarse		6.9	17.5	2.1	1.1	170	OF	18		600	9.6	725	26.7	27.1536	4									0.58959	3.50601		2.19974	0.87131
73	Troy et al., 2013	53.1	-7.91			pot		coarse		6.9	17.5	2.1	1.1	170	OF	18		600	9.3	970	4.2	230.952	4									0.669498	3.69685		3.00857	0.929561
74	Huang et al., 2014	35.12	107.4	584	9.1	Field		medium	upland				1.3	0	None	20	herbaceous	400					3	0.00124301				0.0918075							0				-0.0233474
74	Huang et al., 2014	35.12	107.4	584	9.1	Field		medium	upland				1.3	225	IN	0	herbaceous	400					3	-0.00249066				-0.0292704							1.16575				0
74	Huang et al., 2014	35.12	107.4	584	9.1	Field		medium	upland				1.3	225	IN	10	herbaceous	400					3	0.00124301				0.046957							1.13275				-0.0155042
74	Huang et al., 2014	35.12	107.4	584	9.1	Field		medium	upland				1.3	225	IN	20	herbaceous	400					3	0.00496279				0.100541							1.06327				-0.0233474
74	Huang et al., 2014	35.12	107.4	584	9.1	Field		medium	upland				1.3	225	IN	30	herbaceous	400					3	0.00743498				0.175891							0.957113				-0.0392207
75	Wang et al., 2021	28.31	115.09	1650	17.5	Field	0.33		paddy	5.6	27.898	2.85		0	None	40	herbaceous	425	10.3			59	3										-0.165635		-0.13353	-0.165606
75	Wang et al., 2021	28.31	115.09	1650	17.5	Field	0.33		paddy	5.6	27.898	2.85		165	IN	0	herbaceous	425	10.3			59	3										-0.244298		0.154151	-0.24387
75	Wang et al., 2021	28.31	115.09	1650	17.5	Field	0.33		paddy	5.6	27.898	2.85		165	IN	20	herbaceous	425	10.3			59	3										-0.383984		0.117782	-0.383414
75	Wang et al., 2021	28.31	115.09	1650	17.5	Field	0.33		paddy	5.6	27.898	2.85		165	IN	40	herbaceous	425	10.3			59	3										-0.482912		0.348308	-0.481778
75	Wang et al., 2021	28.31	115.09	1650	17.5	Field	0.33		paddy	5.6	27.898	2.85		0	None	40	herbaceous	425	10.3			59	3										-0.424538		-1.30833	-0.424998
75	Wang et al., 2021	28.31	115.09	1650	17.5	Field	0.33		paddy	5.6	27.898	2.85		180	IN	0	herbaceous	425	10.3			59	3										0.136218		0.563469	0.136636
75	Wang et al., 2021	28.31	115.09	1650	17.5	Field	0.33		paddy	5.6	27.898	2.85		180	IN	20	herbaceous	425	10.3			59	3										-0.360874		1.54237	-0.356408
75	Wang et al., 2021	28.31	115.09	1650	17.5	Field	0.33		paddy	5.6	27.898	2.85		180	IN	40	herbaceous	425	10.3			59	3										-0.509211		1.48283	-0.504258
75	Wang et al., 2021	28.31	115.09	1650	17.5	Field	1		paddy	5.6	27.898	2.85		0	None	40	herbaceous	425	10.3			59	3	0.0234844	0.435107			0.0559587					-0.286494		-0.628609	-0.299905	0.109166	-0.412845
75	Wang et al., 2021	28.31	115.09	1650	17.5	Field	1		paddy	5.6	27.898	2.85		345	IN	0	herbaceous	425	10.3			59	3	-0.00396826	0.0969788			0.0457022					0.00833287		0.459532	0.0163619	0.535495	-0.527063
75	Wang et al., 2021	28.31	115.09	1650	17.5	Field	1		paddy	5.6	27.898	2.85		345	IN	20	herbaceous	425	10.3			59	3	0.0157174	0.168988			0.0213531					-0.362545		1.22378	-0.374596	0.564642	-0.950482
75	Wang et al., 2021	28.31	115.09	1650	17.5	Field	1		paddy	5.6	27.898	2.85		345	IN	40	herbaceous	425	10.3			59	3	0.0369333	0.424453			0.0318611					-0.54046		1.18886	-0.510084	0.564642	-1.08401
